# Supplementary material for: Differential splicing choices made by neurons and astrocytes and their importance when investigating signal-dependent alternative splicing in neural cells
Source: Front Mol Neurosci. 2023 Jul 3;16:1214439. doi: 10.3389/fnmol.2023.1214439 (PMC10350517; doi:10.3389/fnmol.2023.1214439)
Supplement: Supplementary file 1 [file Table_1.XLSX]

## Sheet: Figure 1
Fig. 1b: Gfap	Con (NaCl)	KCl	KCl+MK-801		Fig. 1c: cell death	Con (NaCl)	KCl	KCl+MK-801
	8.5827	40.0337	7.99759			5.75319	69.5388	9.80971
	12.8065	55.0312	12.0494			20.8808	66.8152	43.659
	7.30831	31.3947	8.35527			12.2201	75.012	14.7059
	30.3859	61.9089	31.9195			20.6916	52.3519	23.7381
Fig. 1b: NeuN	91.4173	59.9663	92.0024
	92.6917	68.6053	91.6447
	87.1935	44.9688	87.9506
	69.6141	38.0911	68.0805

## Sheet: Figure 2
Fig. S1c (neurons)	Con (NaCl)	KCl	KCl+MK-801		Fig. S1d (neurons) ng/µl	Con (NaCl)	KCl	KCl+MK-801
	5.93813	89.6736	7.01554			31.5	9.1	17.5
	22.3298	90.8941	18.1854			33.7	22.1	50.4
	16.9858	75.0151	43.8592			49.1	17.3	63.1
	19.4641	94.1301	17.3607			73.9	26.3	63.5
						32.1	9.4	15.9
Fig. S1c (astrocytes)	4.58854	4.71256	7.25804			6.5	3.7	7.3
	9.60665	8.22536	12.2289			15.4	7.5	35.9
	8.16928	6.86459	8.44212			10.5	2.9	4.9
	14.5996	15.0948	17.8923			13	4.8	11.3
						35.6	10.1	45.1
					Fig. S1d (astrocytes) ng/µl	7	9.7	10.9
						5.9	6.2	7
						9.6	7	7.2
						16.5	20.2	15.7
						21	19.5	22.8
						6.9	8.7	9.5
						3.9	5.4	6.7
						16.2	12.9	12
						10.7	11.6	12.1
						18.2	17.9	19.4

## Sheet: Figure 3
Fig. 3a	Con (NaCl)	KCl	KCl+MK-801		Fig. 3b	Con (NaCl)	KCl	KCl+MK-801		Fig.3c		Con (NaCl)	KCl	KCl+MK-801		Fig. 3d	Con (NaCl)	KCl	KCl+MK-801
	0.391495	0.251734	0.343967			5.72209	9.58003	6.5953				0.809465	2.33448	0.884292			0.693105	1.36488	0.423978
	0.406685	0.282706	0.405564			23.0612	51.7679	30.6221				0.474471	3.27225	1.78689			0.601143	0.64118	0.755489
	0.237561	0.298084	0.343484			5.27318	6.40099	7.5259				0.970117	5.30307	0.78303			0.631136	0.721636	0.712709
	0.340274	0.295916	0.337995			7.74494	15.2777					0.539048	0.250732	0.57283			0.531418	0.827735	0.727776
	0.226359	0.236252	0.296274			76.0006	66.4676	64.2266				0.270906	0.27079	0.991139			0.622625	0.858769	0.627961
	0.152229	0.201426	0.185602			79.133	79.8681	50.4907				0.948778	2.88264	1.54208			0.174193	0.77528	0.000335
	0.214361	0.189778	0.245479			55.1537	26.74	54.2458				1.38466	1.55184	2.09518			0.677332	1.19599	0.712374
												2.64088	6.59437	2.95568			0.552478	0.593949	0.281999
												2.33053	4.06926	2.80382
												2.27988	3.08706	1.83217

## Sheet: Figure 4a
neuron-specific gene	neuron-specific gene_name	description	expression level in pure neuronal cultures (fpkm)	expression level in pure astrocyte cultures (fpkm)	Control average FPKM from Ding et al.	KCl average FPKM from Ding et al.	KCl vs. Con Log2-fold change	DESeq2 adjusted p-value (Con vs KCl)
ENSMUSG00000046215	Rprml	reprimo-like [Source:MGI Symbol;Acc:MGI:2144486]	23.9183	0.00625683	19.7978	2.05746	-3.45146	4.80373e-05
ENSMUSG00000070570	Slc17a7	solute carrier family 17 (sodium-dependent inorganic phosphate cotransporter), member 7 [Source:MGI Symbol;Acc:MGI:1920211]	128.62	0.0649198	95.0437	9.91515	-3.44255	6.43791e-05
ENSMUSG00000037579	Kcnh3	potassium voltage-gated channel, subfamily H (eag-related), member 3 [Source:MGI Symbol;Acc:MGI:1341723]	26.0766	0.62226	18.8489	2.26978	-3.23403	1.02062e-05
ENSMUSG00000053025	Sv2b	synaptic vesicle glycoprotein 2 b [Source:MGI Symbol;Acc:MGI:1927338]	38.4477	0.0167509	33.4281	4.0478	-3.21929	0.000131369
ENSMUSG00000028785	Hpca	hippocalcin [Source:MGI Symbol;Acc:MGI:1336200]	70.4105	0.226627	49.4651	6.44849	-3.12817	1.95231e-05
ENSMUSG00000032174	Icam5	intercellular adhesion molecule 5, telencephalin [Source:MGI Symbol;Acc:MGI:109430]	29.4284	0.613754	21.9057	2.85868	-3.12119	0.000110836
ENSMUSG00000032936	Camkv	CaM kinase-like vesicle-associated [Source:MGI Symbol;Acc:MGI:2384296]	162.585	0.423267	107.667	14.0544	-3.11479	2.89004e-05
ENSMUSG00000059213	Ddn	dendrin [Source:MGI Symbol;Acc:MGI:108101]	65.9395	0.112014	74.3814	9.88615	-3.09087	2.89004e-05
ENSMUSG00000025128	Bhlhe22	basic helix-loop-helix family, member e22 [Source:MGI Symbol;Acc:MGI:1930001]	66.1599	0.351944	40.8168	5.67237	-3.02899	4.80373e-05
ENSMUSG00000054459	Vsnl1	visinin-like 1 [Source:MGI Symbol;Acc:MGI:1349453]	225.796	0.120118	132.861	18.4352	-3.02239	0.000301283
ENSMUSG00000025889	Snca	synuclein, alpha [Source:MGI Symbol;Acc:MGI:1277151]	325.594	1.14357	144.156	20.19	-3.01721	6.43791e-05
ENSMUSG00000028773	Fabp3	fatty acid binding protein 3, muscle and heart [Source:MGI Symbol;Acc:MGI:95476]	81.6541	0.817188	51.673	7.40691	-2.98846	1.18326e-05
ENSMUSG00000003872	Lin7b	lin-7 homolog B (C. elegans) [Source:MGI Symbol;Acc:MGI:1330858]	42.4403	0.74234	24.5035	3.60194	-2.96044	0.000366378
ENSMUSG00000090071	Cdk5r2	cyclin-dependent kinase 5, regulatory subunit 2 (p39) [Source:MGI Symbol;Acc:MGI:1330828]	75.7754	0.0718964	91.3238	13.2942	-2.95751	3.77741e-05
ENSMUSG00000032532	Cck	cholecystokinin [Source:MGI Symbol;Acc:MGI:88297]	72.4466	0	56.1563	8.61293	-2.87641	0.000205765
ENSMUSG00000030729	Pgm2l1	phosphoglucomutase 2-like 1 [Source:MGI Symbol;Acc:MGI:1918224]	61.6171	0.329027	54.2028	8.31601	-2.86983	0.000152224
ENSMUSG00000035653	Lrfn5	leucine rich repeat and fibronectin type III domain containing 5 [Source:MGI Symbol;Acc:MGI:2144814]	28.0714	0.0130992	21.7028	3.37989	-2.8537	0.000624843
ENSMUSG00000053310	Nrgn	neurogranin [Source:MGI Symbol;Acc:MGI:1927184]	137.201	0.120838	123.956	19.5894	-2.84059	0.000131369
ENSMUSG00000026163	Sphkap	SPHK1 interactor, AKAP domain containing [Source:MGI Symbol;Acc:MGI:1924879]	27.9334	0.141804	18.7703	3.02079	-2.80559	0.000141118
ENSMUSG00000034891	Sncb	synuclein, beta [Source:MGI Symbol;Acc:MGI:1889011]	168.012	1.40334	162.472	26.4521	-2.79242	0.000202285
ENSMUSG00000027500	Stmn2	stathmin-like 2 [Source:MGI Symbol;Acc:MGI:98241]	697.533	36.3459	303.802	49.769	-2.78409	7.87736e-05
ENSMUSG00000063646	Jakmip1	janus kinase and microtubule interacting protein 1 [Source:MGI Symbol;Acc:MGI:1923321]	25.355	0.3098	26.7644	4.49617	-2.74546	4.61521e-05
ENSMUSG00000009376	Met	met proto-oncogene [Source:MGI Symbol;Acc:MGI:96969]	31.1091	2.67219	20.5686	3.45603	-2.74269	4.12439e-06
ENSMUSG00000036760	Kcnk9	potassium channel, subfamily K, member 9 [Source:MGI Symbol;Acc:MGI:3521816]	18.7519	0	19.0515	3.20158	-2.73608	0.000902642
ENSMUSG00000053963	Stum	mechanosensory transduction mediator [Source:MGI Symbol;Acc:MGI:2138735]	39.3593	0.0435486	32.9768	5.65013	-2.71646	0.000940347
ENSMUSG00000018865	Sult4a1	sulfotransferase family 4A, member 1 [Source:MGI Symbol;Acc:MGI:1888971]	103.65	1.92632	95.5234	16.5665	-2.71272	3.28342e-05
ENSMUSG00000050640	Tmem150c	transmembrane protein 150C [Source:MGI Symbol;Acc:MGI:3041258]	30.7593	0.140104	20.5227	3.59193	-2.68638	0.00012664
ENSMUSG00000060371	Caln1	calneuron 1 [Source:MGI Symbol;Acc:MGI:2155987]	47.4016	0.0178654	45.3598	7.98743	-2.67018	0.00104339
ENSMUSG00000022055	Nefl	neurofilament, light polypeptide [Source:MGI Symbol;Acc:MGI:97313]	45.6692	0.0370932	34.2371	6.06331	-2.66893	0.000191246
ENSMUSG00000039706	Ldb2	LIM domain binding 2 [Source:MGI Symbol;Acc:MGI:894670]	37.2114	0.524183	42.2846	7.44548	-2.66689	0.000706819
ENSMUSG00000030707	Coro1a	coronin, actin binding protein 1A [Source:MGI Symbol;Acc:MGI:1345961]	85.0855	2.30712	37.5125	6.75285	-2.66011	3.99719e-05
ENSMUSG00000047842	Diras2	DIRAS family, GTP-binding RAS-like 2 [Source:MGI Symbol;Acc:MGI:1915453]	63.0734	2.12831	43.5966	7.78072	-2.65539	0.000399225
ENSMUSG00000031144	Syp	synaptophysin [Source:MGI Symbol;Acc:MGI:98467]	412.169	6.00058	172.506	31.0661	-2.65516	3.28342e-05
ENSMUSG00000044216	Kcnj4	potassium inwardly-rectifying channel, subfamily J, member 4 [Source:MGI Symbol;Acc:MGI:104743]	26.3135	1.23796	26.0693	4.75261	-2.64189	0.00013716
ENSMUSG00000022099	Dmtn	dematin actin binding protein [Source:MGI Symbol;Acc:MGI:99670]	58.4119	1.06614	38.3034	6.94825	-2.63654	7.91129e-05
ENSMUSG00000042532	Golga7b	golgi autoantigen, golgin subfamily a, 7B [Source:MGI Symbol;Acc:MGI:1918396]	46.5232	0.160711	31.9062	5.87994	-2.62017	2.75617e-05
ENSMUSG00000029757	Dync1i1	dynein cytoplasmic 1 intermediate chain 1 [Source:MGI Symbol;Acc:MGI:107743]	76.538	0.48162	44.4121	8.17506	-2.61487	0.000131369
ENSMUSG00000056596	Trnp1	TMF1-regulated nuclear protein 1 [Source:MGI Symbol;Acc:MGI:1916789]	39.4817	0.490782	30.8041	5.76296	-2.60323	4.27287e-05
ENSMUSG00000056413	Adap1	ArfGAP with dual PH domains 1 [Source:MGI Symbol;Acc:MGI:2442201]	101.402	4.95134	85.6884	16.0312	-2.60004	4.63692e-05
ENSMUSG00000046093	Hpcal4	hippocalcin-like 4 [Source:MGI Symbol;Acc:MGI:2157521]	42.6161	0.38679	35.1119	6.54627	-2.59579	0.000235475
ENSMUSG00000078307	AI593442	expressed sequence AI593442 [Source:MGI Symbol;Acc:MGI:2143099]	17.1956	0.339986	17.975	3.35894	-2.59337	0.000104639
ENSMUSG00000028528	Dnajc6	DnaJ heat shock protein family (Hsp40) member C6 [Source:MGI Symbol;Acc:MGI:1919935]	55.0634	0.188117	30.8573	5.77587	-2.5877	0.000409906
ENSMUSG00000067889	Sptbn2	spectrin beta, non-erythrocytic 2 [Source:MGI Symbol;Acc:MGI:1313261]	104.986	0.336452	105.839	19.9607	-2.58029	0.000104639
ENSMUSG00000047261	Gap43	growth associated protein 43 [Source:MGI Symbol;Acc:MGI:95639]	918.407	12.4093	661.685	125.797	-2.57077	4.80373e-05
ENSMUSG00000040794	C1qtnf4	C1q and tumor necrosis factor related protein 4 [Source:MGI Symbol;Acc:MGI:1914695]	30.2741	0.282265	32.239	6.17095	-2.56968	9.46139e-05
ENSMUSG00000000308	Ckmt1	creatine kinase, mitochondrial 1, ubiquitous [Source:MGI Symbol;Acc:MGI:99441]	71.7823	5.23269	32.7738	6.27809	-2.5631	6.8019e-05
ENSMUSG00000037843	Vstm2l	V-set and transmembrane domain containing 2-like [Source:MGI Symbol;Acc:MGI:2685537]	59.5394	0.194893	59.9954	11.6338	-2.55509	0.000147398
ENSMUSG00000016349	Eef1a2	eukaryotic translation elongation factor 1 alpha 2 [Source:MGI Symbol;Acc:MGI:1096317]	210.986	9.2239	124.222	23.8961	-2.55426	0.00011112
ENSMUSG00000036578	Fxyd7	FXYD domain-containing ion transport regulator 7 [Source:MGI Symbol;Acc:MGI:1889006]	49.2804	0.198623	28.4184	5.45613	-2.55361	0.000246693
ENSMUSG00000037984	Neurod6	neurogenic differentiation 6 [Source:MGI Symbol;Acc:MGI:106593]	142.624	0.0180438	68.0637	13.0822	-2.53543	0.329636
ENSMUSG00000055078	Gabra5	gamma-aminobutyric acid (GABA) A receptor, subunit alpha 5 [Source:MGI Symbol;Acc:MGI:95617]	76.5669	0.982073	50.3981	9.91589	-2.51559	0.000289096
ENSMUSG00000044349	Snhg11	small nucleolar RNA host gene 11 [Source:MGI Symbol;Acc:MGI:2441845]	81.0104	0.728375	31.557	6.20256	-2.51354	0.000151204
ENSMUSG00000061451	Tmem151a	transmembrane protein 151A [Source:MGI Symbol;Acc:MGI:2147713]	34.3596	0.301694	28.4764	5.66046	-2.50587	9.67359e-05
ENSMUSG00000007021	Syngr3	synaptogyrin 3 [Source:MGI Symbol;Acc:MGI:1341881]	170.527	4.8478	100.115	20.1258	-2.49734	4.63692e-05
ENSMUSG00000041708	Mpped1	metallophosphoesterase domain containing 1 [Source:MGI Symbol;Acc:MGI:106316]	137.787	0.632063	81.0203	16.2296	-2.49064	0.000266395
ENSMUSG00000029120	Ppp2r2c	protein phosphatase 2, regulatory subunit B, gamma [Source:MGI Symbol;Acc:MGI:2442660]	132.705	1.7076	93.8788	18.949	-2.48244	0.00010284
ENSMUSG00000036564	Ndrg4	N-myc downstream regulated gene 4 [Source:MGI Symbol;Acc:MGI:2384590]	441.486	7.98031	224.118	45.5668	-2.47887	9.46139e-05
ENSMUSG00000057897	Camk2b	calcium/calmodulin-dependent protein kinase II, beta [Source:MGI Symbol;Acc:MGI:88257]	244.186	7.40349	196.618	39.8688	-2.4768	0.0001726
ENSMUSG00000056222	Spock1	sparc/osteonectin, cwcv and kazal-like domains proteoglycan 1 [Source:MGI Symbol;Acc:MGI:105371]	43.6712	0.208128	33.9117	6.83931	-2.47163	0.00104372
ENSMUSG00000054013	Tmem179	transmembrane protein 179 [Source:MGI Symbol;Acc:MGI:2144891]	35.6621	0.647069	24.965	5.14007	-2.47159	0.000384763
ENSMUSG00000005583	Mef2c	myocyte enhancer factor 2C [Source:MGI Symbol;Acc:MGI:99458]	176.188	2.12872	106.763	21.5938	-2.47153	0.000668731
ENSMUSG00000034825	Nrip3	nuclear receptor interacting protein 3 [Source:MGI Symbol;Acc:MGI:1925843]	25.9206	0.429747	28.4312	5.80811	-2.46377	0.000338109
ENSMUSG00000052572	Dlg2	discs, large homolog 2 (Drosophila) [Source:MGI Symbol;Acc:MGI:1344351]	71.6766	0.143139	51.7726	10.5717	-2.45553	0.00237173
ENSMUSG00000021062	Rab15	RAB15, member RAS oncogene family [Source:MGI Symbol;Acc:MGI:1916865]	43.0084	0.502669	34.3295	7.12677	-2.44657	9.97202e-05
ENSMUSG00000109006	B230209E15Rik	RIKEN cDNA B230209E15 gene [Source:MGI Symbol;Acc:MGI:2442668]	14.1882	0.0223182	26.9827	5.52245	-2.44477	0.00135
ENSMUSG00000045733	Sprn	shadow of prion protein [Source:MGI Symbol;Acc:MGI:3582583]	36.8413	0.103349	18.0434	3.74318	-2.44347	0.00243929
ENSMUSG00000038255	Neurod2	neurogenic differentiation 2 [Source:MGI Symbol;Acc:MGI:107755]	41.8707	0.00251529	27.2197	5.68404	-2.42675	0.00103597
ENSMUSG00000030077	Chl1	cell adhesion molecule L1-like [Source:MGI Symbol;Acc:MGI:1098266]	136.549	8.73215	83.076	17.331	-2.4214	0.000905897
ENSMUSG00000044847	Lsm11	U7 snRNP-specific Sm-like protein LSM11 [Source:MGI Symbol;Acc:MGI:1919540]	24.2758	0.570033	19.4918	4.13902	-2.41327	2.89004e-05
ENSMUSG00000032503	Arpp21	cyclic AMP-regulated phosphoprotein, 21 [Source:MGI Symbol;Acc:MGI:107562]	82.0858	0.374281	42.304	8.99243	-2.40209	0.00100858
ENSMUSG00000035864	Syt1	synaptotagmin I [Source:MGI Symbol;Acc:MGI:99667]	179.626	4.90167	124.903	26.7602	-2.39139	0.000147398
ENSMUSG00000036062	Phf24	PHD finger protein 24 [Source:MGI Symbol;Acc:MGI:2140712]	31.8791	0.106557	20.4565	4.39599	-2.38481	0.00143195
ENSMUSG00000020635	Fkbp1b	FK506 binding protein 1b [Source:MGI Symbol;Acc:MGI:1336205]	59.7389	5.02517	30.0581	6.52349	-2.38406	0.000155839
ENSMUSG00000029878	Dbpht2	DNA binding protein with his-thr domain [Source:MGI Symbol;Acc:MGI:2679513]	19.8308	0.373083	17.2106	3.71353	-2.38191	0.000458122
ENSMUSG00000024261	Syt4	synaptotagmin IV [Source:MGI Symbol;Acc:MGI:101759]	108.572	0.216276	77.4888	16.652	-2.38141	0.00139675
ENSMUSG00000040907	Atp1a3	ATPase, Na+/K+ transporting, alpha 3 polypeptide [Source:MGI Symbol;Acc:MGI:88107]	617.464	1.65674	359.156	77.6383	-2.38135	0.000205765
ENSMUSG00000025092	Hspa12a	heat shock protein 12A [Source:MGI Symbol;Acc:MGI:1920692]	35.8084	1.59462	19.7956	4.28415	-2.37706	0.000257718
ENSMUSG00000032564	Cpne4	copine IV [Source:MGI Symbol;Acc:MGI:1921270]	18.828	0.172294	17.4678	3.82346	-2.36727	0.000409969
ENSMUSG00000075318	Scn2a	sodium channel, voltage-gated, type II, alpha [Source:MGI Symbol;Acc:MGI:98248]	37.0185	1.07502	36.4903	7.9827	-2.35943	0.000867224
ENSMUSG00000027419	Pcsk2	proprotein convertase subtilisin/kexin type 2 [Source:MGI Symbol;Acc:MGI:97512]	30.2263	0.256504	23.4111	5.15614	-2.35871	0.000152224
ENSMUSG00000007207	Stx1a	syntaxin 1A (brain) [Source:MGI Symbol;Acc:MGI:109355]	118.587	3.17578	82.2814	18.1174	-2.35631	0.000152784
ENSMUSG00000038128	Camk4	calcium/calmodulin-dependent protein kinase IV [Source:MGI Symbol;Acc:MGI:88258]	20.1179	1.43367	23.7274	5.18887	-2.35553	0.000491336
ENSMUSG00000004933	Matk	megakaryocyte-associated tyrosine kinase [Source:MGI Symbol;Acc:MGI:99259]	53.151	1.50619	18.3858	4.06952	-2.35482	0.000131369
ENSMUSG00000058624	Gda	guanine deaminase [Source:MGI Symbol;Acc:MGI:95678]	70.2465	0.181329	48.5672	10.7086	-2.35326	0.00116889
ENSMUSG00000035226	Rims4	regulating synaptic membrane exocytosis 4 [Source:MGI Symbol;Acc:MGI:2674366]	26.3293	0.14255	23.1299	5.11484	-2.35119	9.75198e-05
ENSMUSG00000027438	Napb	N-ethylmaleimide sensitive fusion protein attachment protein beta [Source:MGI Symbol;Acc:MGI:104562]	101.154	2.39495	70.6101	15.6364	-2.3504	0.000141118
ENSMUSG00000031391	L1cam	L1 cell adhesion molecule [Source:MGI Symbol;Acc:MGI:96721]	169.674	0.20612	84.1345	18.4653	-2.34858	0.0027456
ENSMUSG00000008153	Clstn3	calsyntenin 3 [Source:MGI Symbol;Acc:MGI:2178323]	94.5798	0.305362	71.275	15.8325	-2.3456	0.000129991
ENSMUSG00000025855	Prkar1b	protein kinase, cAMP dependent regulatory, type I beta [Source:MGI Symbol;Acc:MGI:97759]	246.022	9.18068	140.646	31.3158	-2.34512	0.000126642
ENSMUSG00000042182	Bend6	BEN domain containing 6 [Source:MGI Symbol;Acc:MGI:2444572]	62.694	3.06429	44.7072	9.91637	-2.3432	0.000409906
ENSMUSG00000021301	Hecw1	HECT, C2 and WW domain containing E3 ubiquitin protein ligase 1 [Source:MGI Symbol;Acc:MGI:2444115]	18.0718	0.0158879	18.6109	4.11674	-2.33409	0.00631661
ENSMUSG00000073433	Arhgdig	Rho GDP dissociation inhibitor (GDI) gamma [Source:MGI Symbol;Acc:MGI:108430]	32.2451	2.1061	27.2751	6.15823	-2.32916	0.00010284
ENSMUSG00000056812	St8sia3	ST8 alpha-N-acetyl-neuraminide alpha-2,8-sialyltransferase 3 [Source:MGI Symbol;Acc:MGI:106019]	27.1939	0.00855424	17.1803	3.86508	-2.30788	0.330107
ENSMUSG00000004187	Kifc2	kinesin family member C2 [Source:MGI Symbol;Acc:MGI:109187]	87.5148	6.6957	57.8946	13.2585	-2.30659	9.67359e-05
ENSMUSG00000050896	Rtn4rl2	reticulon 4 receptor-like 2 [Source:MGI Symbol;Acc:MGI:2669796]	30.521	0.284931	39.4235	8.90312	-2.30595	0.00874718
ENSMUSG00000050751	Pgbd5	piggyBac transposable element derived 5 [Source:MGI Symbol;Acc:MGI:2429955]	24.1688	0.180749	19.0731	4.40957	-2.29298	0.000312753
ENSMUSG00000022044	Stmn4	stathmin-like 4 [Source:MGI Symbol;Acc:MGI:1931224]	298.936	3.7348	228.494	53.2945	-2.28135	0.000149721
ENSMUSG00000006435	Neurl1a	neuralized E3 ubiquitin protein ligase 1A [Source:MGI Symbol;Acc:MGI:1334263]	16.2576	0.196548	18.8138	4.38593	-2.27869	0.000128043
ENSMUSG00000041670	Rims1	regulating synaptic membrane exocytosis 1 [Source:MGI Symbol;Acc:MGI:2152971]	21.1026	0.10616	22.3385	5.15441	-2.27729	0.00104339
ENSMUSG00000052981	Ube2ql1	ubiquitin-conjugating enzyme E2Q family-like 1 [Source:MGI Symbol;Acc:MGI:1924230]	100.808	0.968542	88.1341	20.5236	-2.274	0.000455118
ENSMUSG00000045038	Prkce	protein kinase C, epsilon [Source:MGI Symbol;Acc:MGI:97599]	52.3724	5.11822	52.9003	12.2943	-2.27369	0.000344897
ENSMUSG00000039372	2004-03-01	membrane-associated ring finger (C3HC4) 4 [Source:MGI Symbol;Acc:MGI:2683550]	28.4368	2.44568	17.1642	3.98609	-2.27352	0.000176817
ENSMUSG00000063142	Kcnma1	potassium large conductance calcium-activated channel, subfamily M, alpha member 1 [Source:MGI Symbol;Acc:MGI:99923]	13.976	0.106141	16.6561	3.8526	-2.27148	0.00233067
ENSMUSG00000030854	Ptpn5	protein tyrosine phosphatase, non-receptor type 5 [Source:MGI Symbol;Acc:MGI:97807]	74.8568	0.273389	43.4221	10.121	-2.27128	0.000299387
ENSMUSG00000025468	Caly	calcyon neuron-specific vesicular protein [Source:MGI Symbol;Acc:MGI:1915816]	147.667	0.382243	81.4337	19.143	-2.25734	0.00180625
ENSMUSG00000020431	Adcy1	adenylate cyclase 1 [Source:MGI Symbol;Acc:MGI:99677]	58.3841	4.93033	69.1481	16.3008	-2.2567	6.97335e-05
ENSMUSG00000078816	Prkcg	protein kinase C, gamma [Source:MGI Symbol;Acc:MGI:97597]	98.0701	4.0813	44.5872	10.4882	-2.25557	0.000366378
ENSMUSG00000037362	Nov	nephroblastoma overexpressed gene [Source:MGI Symbol;Acc:MGI:109185]	35.8815	3.44988	52.7505	12.5573	-2.2525	0.000458122
ENSMUSG00000038530	Rgs4	regulator of G-protein signaling 4 [Source:MGI Symbol;Acc:MGI:108409]	134.465	3.34979	65.2906	15.4082	-2.25131	0.00127272
ENSMUSG00000053825	Ppfia2	protein tyrosine phosphatase, receptor type, f polypeptide (PTPRF), interacting protein (liprin), alpha 2 [Source:MGI Symbol;Acc:MGI:2443834]	27.3997	0.197559	18.4356	4.36297	-2.24597	0.001743
ENSMUSG00000044288	Cnr1	cannabinoid receptor 1 (brain) [Source:MGI Symbol;Acc:MGI:104615]	46.0697	1.59192	36.2863	8.61932	-2.2425	0.00045175
ENSMUSG00000027273	Snap25	synaptosomal-associated protein 25 [Source:MGI Symbol;Acc:MGI:98331]	134.977	0.438247	82.4599	19.6317	-2.23938	0.000586141
ENSMUSG00000022415	Syngr1	synaptogyrin 1 [Source:MGI Symbol;Acc:MGI:1328323]	114.411	8.00789	88.3626	21.2797	-2.23705	0.000126642
ENSMUSG00000027581	Stmn3	stathmin-like 3 [Source:MGI Symbol;Acc:MGI:1277137]	752.063	10.5429	334.881	81.4759	-2.22831	0.000458122
ENSMUSG00000038065	Mturn	maturin, neural progenitor differentiation regulator homolog (Xenopus) [Source:MGI Symbol;Acc:MGI:1915485]	109.406	9.15069	52.2124	12.6876	-2.21887	7.68084e-05
ENSMUSG00000022421	Nptxr	neuronal pentraxin receptor [Source:MGI Symbol;Acc:MGI:1920590]	111.944	2.58799	96.368	23.2752	-2.21296	0.00196525
ENSMUSG00000044667	Plppr4	phospholipid phosphatase related 4 [Source:MGI Symbol;Acc:MGI:106530]	85.7507	7.37657	69.6586	16.8852	-2.21106	0.00109874
ENSMUSG00000054871	Tmem158	transmembrane protein 158 [Source:MGI Symbol;Acc:MGI:1919559]	49.9405	3.62994	44.1196	10.8204	-2.2082	0.000366378
ENSMUSG00000017740	Slc12a5	solute carrier family 12, member 5 [Source:MGI Symbol;Acc:MGI:1862037]	53.2315	0.412183	35.0246	8.55136	-2.20725	0.00010284
ENSMUSG00000025658	Cnksr2	connector enhancer of kinase suppressor of Ras 2 [Source:MGI Symbol;Acc:MGI:2661175]	26.1021	0.330607	23.587	5.71452	-2.20412	0.00537141
ENSMUSG00000040536	Necab1	N-terminal EF-hand calcium binding protein 1 [Source:MGI Symbol;Acc:MGI:1916602]	51.0039	0.0650916	26.8118	6.52562	-2.18805	0.525713
ENSMUSG00000033615	Cplx1	complexin 1 [Source:MGI Symbol;Acc:MGI:104727]	156.103	0.569978	97.516	24.2282	-2.18405	7.63435e-05
ENSMUSG00000035964	Tmem59l	transmembrane protein 59-like [Source:MGI Symbol;Acc:MGI:1915187]	65.1226	0.582017	38.6002	9.55828	-2.18305	0.0022037
ENSMUSG00000026959	Grin1	glutamate receptor, ionotropic, NMDA1 (zeta 1) [Source:MGI Symbol;Acc:MGI:95819]	76.2777	0.567128	50.2451	12.4493	-2.17657	0.00173026
ENSMUSG00000044071	Fam19a2	family with sequence similarity 19, member A2 [Source:MGI Symbol;Acc:MGI:2143691]	33.604	0.142589	22.6659	5.67539	-2.17563	0.000384763
ENSMUSG00000039809	Gabbr2	gamma-aminobutyric acid (GABA) B receptor, 2 [Source:MGI Symbol;Acc:MGI:2386030]	45.2733	0.510598	44.926	11.1415	-2.17479	0.00144751
ENSMUSG00000016346	Kcnq2	potassium voltage-gated channel, subfamily Q, member 2 [Source:MGI Symbol;Acc:MGI:1309503]	51.2758	0.155169	37.6704	9.40281	-2.1722	0.000365464
ENSMUSG00000028005	Gucy1b3	guanylate cyclase 1, soluble, beta 3 [Source:MGI Symbol;Acc:MGI:1860604]	93.8191	0.763873	50.0966	12.6444	-2.1627	0.000659706
ENSMUSG00000033066	Gas7	growth arrest specific 7 [Source:MGI Symbol;Acc:MGI:1202388]	69.1229	6.28883	75.0846	18.8613	-2.16059	0.000491336
ENSMUSG00000090223	Pcp4	Purkinje cell protein 4 [Source:MGI Symbol;Acc:MGI:97509]	83.7068	5.61291	17.6483	4.57009	-2.1567	0.596769
ENSMUSG00000062380	Tubb3	tubulin, beta 3 class III [Source:MGI Symbol;Acc:MGI:107813]	991.285	13.0893	584.583	149.237	-2.15185	0.000184666
ENSMUSG00000043811	Rtn4r	reticulon 4 receptor [Source:MGI Symbol;Acc:MGI:2136886]	29.901	0.428001	16.0169	4.04109	-2.14774	0.00471238
ENSMUSG00000060780	Lrrtm1	leucine rich repeat transmembrane neuronal 1 [Source:MGI Symbol;Acc:MGI:2389173]	30.6382	0.664699	23.4856	5.9895	-2.14645	0.000122981
ENSMUSG00000049583	Grm5	glutamate receptor, metabotropic 5 [Source:MGI Symbol;Acc:MGI:1351342]	34.9583	0.52542	26.8664	6.81097	-2.14446	0.0011594
ENSMUSG00000028488	Sh3gl2	SH3-domain GRB2-like 2 [Source:MGI Symbol;Acc:MGI:700009]	57.3459	1.13749	33.8356	8.72382	-2.12602	0.000616162
ENSMUSG00000074657	Kif5a	kinesin family member 5A [Source:MGI Symbol;Acc:MGI:109564]	181.786	2.23482	109.856	28.3322	-2.12557	0.000365464
ENSMUSG00000052584	Serp2	stress-associated endoplasmic reticulum protein family member 2 [Source:MGI Symbol;Acc:MGI:1919911]	89.8736	3.68497	59.9205	15.6614	-2.12129	0.000500393
ENSMUSG00000074923	Pak6	p21 protein (Cdc42/Rac)-activated kinase 6 [Source:MGI Symbol;Acc:MGI:2679420]	48.4599	2.9444	46.1418	11.9608	-2.11507	0.000322114
ENSMUSG00000008658	Rbfox1	RNA binding protein, fox-1 homolog (C. elegans) 1 [Source:MGI Symbol;Acc:MGI:1926224]	40.8353	0.0779005	22.5872	5.86299	-2.1133	0.00454618
ENSMUSG00000028937	Acot7	acyl-CoA thioesterase 7 [Source:MGI Symbol;Acc:MGI:1917275]	220.556	11.8912	176.533	46.3089	-2.11022	0.00014599
ENSMUSG00000032735	Ablim3	actin binding LIM protein family, member 3 [Source:MGI Symbol;Acc:MGI:2442582]	18.9884	0.146754	18.3464	4.76155	-2.10982	0.00131154
ENSMUSG00000010086	Rnf112	ring finger protein 112 [Source:MGI Symbol;Acc:MGI:106611]	52.9101	0.290376	16.2925	4.28419	-2.10809	0.000362195
ENSMUSG00000007653	Gabrb2	gamma-aminobutyric acid (GABA) A receptor, subunit beta 2 [Source:MGI Symbol;Acc:MGI:95620]	17.1062	0.340966	18.6077	4.85887	-2.10394	0.000877268
ENSMUSG00000038331	Satb2	special AT-rich sequence binding protein 2 [Source:MGI Symbol;Acc:MGI:2679336]	34.4499	0.917887	17.4983	4.51563	-2.10244	0.0143123
ENSMUSG00000036469	2001-03-01	membrane-associated ring finger (C3HC4) 1 [Source:MGI Symbol;Acc:MGI:1920175]	17.2569	0.328467	16.4159	4.30951	-2.09643	0.000939471
ENSMUSG00000027894	Slc6a17	solute carrier family 6 (neurotransmitter transporter), member 17 [Source:MGI Symbol;Acc:MGI:2442535]	59.5684	2.20559	52.8741	13.9626	-2.09064	0.000205043
ENSMUSG00000050587	Lrrc4c	leucine rich repeat containing 4C [Source:MGI Symbol;Acc:MGI:2442636]	21.7881	1.02806	30.1445	7.95727	-2.08643	0.00146261
ENSMUSG00000082229	Nap1l2	nucleosome assembly protein 1-like 2 [Source:MGI Symbol;Acc:MGI:106654]	31.9414	0.688393	19.7146	5.25848	-2.0856	0.000216787
ENSMUSG00000025576	Rbfox3	RNA binding protein, fox-1 homolog (C. elegans) 3 [Source:MGI Symbol;Acc:MGI:106368]	52.3573	0.459937	46.0051	12.3077	-2.07668	0.000205765
ENSMUSG00000043670	Diras1	DIRAS family, GTP-binding RAS-like 1 [Source:MGI Symbol;Acc:MGI:2183442]	35.4739	0.670735	29.2755	7.96198	-2.06115	0.000399225
ENSMUSG00000022208	Jph4	junctophilin 4 [Source:MGI Symbol;Acc:MGI:2443113]	85.8052	0.821002	73.2556	19.7841	-2.05741	0.000524047
ENSMUSG00000029875	Ccdc184	coiled-coil domain containing 184 [Source:MGI Symbol;Acc:MGI:2146066]	28.7713	1.98507	17.7136	4.8385	-2.05412	0.000514399
ENSMUSG00000071658	Gng3	guanine nucleotide binding protein (G protein), gamma 3 [Source:MGI Symbol;Acc:MGI:102704]	212.468	2.0324	111.303	30.225	-2.04374	0.00287481
ENSMUSG00000061911	Myt1l	myelin transcription factor 1-like [Source:MGI Symbol;Acc:MGI:1100511]	49.3734	0.134938	34.0034	9.23736	-2.04372	0.00222465
ENSMUSG00000041020	Map7d2	MAP7 domain containing 2 [Source:MGI Symbol;Acc:MGI:1917474]	28.1524	1.43277	30.4179	8.38014	-2.03181	0.000338109
ENSMUSG00000022454	Nell2	NEL-like 2 [Source:MGI Symbol;Acc:MGI:1858510]	247.229	10.6135	165.363	45.6003	-2.03074	0.000616162
ENSMUSG00000051951	Xkr4	X-linked Kx blood group related 4 [Source:MGI Symbol;Acc:MGI:3528744]	16.8621	0.394246	19.8695	5.45665	-2.02843	0.00155744
ENSMUSG00000047013	Fbxo41	F-box protein 41 [Source:MGI Symbol;Acc:MGI:1261912]	29.5684	0.785636	21.7905	6.0103	-2.02795	0.000564951
ENSMUSG00000030350	Prmt8	protein arginine N-methyltransferase 8 [Source:MGI Symbol;Acc:MGI:3043083]	47.8311	0.200318	27.0635	7.48517	-2.02793	0.00155744
ENSMUSG00000024524	Gnal	guanine nucleotide binding protein, alpha stimulating, olfactory type [Source:MGI Symbol;Acc:MGI:95774]	67.7827	0.734204	43.2679	11.9828	-2.01801	0.000963842
ENSMUSG00000040640	Erc2	ELKS/RAB6-interacting/CAST family member 2 [Source:MGI Symbol;Acc:MGI:1098749]	39.8557	1.88549	32.2486	8.96577	-2.01546	0.000706819
ENSMUSG00000037872	Ackr1	atypical chemokine receptor 1 (Duffy blood group) [Source:MGI Symbol;Acc:MGI:1097689]	57.9194	1.52531	40.233	11.1253	-2.01438	0.00146261
ENSMUSG00000053192	Mllt11	myeloid/lymphoid or mixed-lineage leukemia; translocated to, 11 [Source:MGI Symbol;Acc:MGI:1929671]	462.043	10.4374	274.825	76.7324	-2.01424	0.000481853
ENSMUSG00000005045	Chd5	chromodomain helicase DNA binding protein 5 [Source:MGI Symbol;Acc:MGI:3036258]	42.0952	0.456953	37.2331	10.3922	-2.01226	0.000312753
ENSMUSG00000032549	Rab6b	RAB6B, member RAS oncogene family [Source:MGI Symbol;Acc:MGI:107283]	189.757	3.9279	129.169	35.9804	-2.00686	0.00120865
ENSMUSG00000034799	Unc13a	unc-13 homolog A (C. elegans) [Source:MGI Symbol;Acc:MGI:3051532]	46.6125	0.770179	39.4947	11.0677	-2.00398	0.00041096
ENSMUSG00000038020	Rapgefl1	Rap guanine nucleotide exchange factor (GEF)-like 1 [Source:MGI Symbol;Acc:MGI:3611446]	36.7576	1.52595	19.2806	5.41724	-2.00052	0.000365464
ENSMUSG00000040125	Gpr26	G protein-coupled receptor 26 [Source:MGI Symbol;Acc:MGI:2441758]	24.4002	0.0795419	19.4831	5.48952	-1.99805	0.000409906
ENSMUSG00000021573	Tppp	tubulin polymerization promoting protein [Source:MGI Symbol;Acc:MGI:1920198]	28.0351	1.31839	20.3423	5.75252	-1.99655	0.000298055
ENSMUSG00000031840	Rab3a	RAB3A, member RAS oncogene family [Source:MGI Symbol;Acc:MGI:97843]	333.329	12.9221	166.086	47.1604	-1.99021	0.000659706
ENSMUSG00000049336	Tenm2	teneurin transmembrane protein 2 [Source:MGI Symbol;Acc:MGI:1345184]	21.3708	0.103418	24.4563	6.83974	-1.98964	0.0102161
ENSMUSG00000037126	Psd	pleckstrin and Sec7 domain containing [Source:MGI Symbol;Acc:MGI:1920978]	157.369	1.24346	104.242	29.6665	-1.98811	0.00033911
ENSMUSG00000022054	Nefm	neurofilament, medium polypeptide [Source:MGI Symbol;Acc:MGI:97314]	20.8753	0.107445	18.395	5.22593	-1.98795	0.00041096
ENSMUSG00000044024	Rell2	RELT-like 2 [Source:MGI Symbol;Acc:MGI:1918044]	48.0138	0.704904	15.92	4.50956	-1.98627	0.000941762
ENSMUSG00000030209	Grin2b	glutamate receptor, ionotropic, NMDA2B (epsilon 2) [Source:MGI Symbol;Acc:MGI:95821]	12.2583	0.11567	27.9258	7.84147	-1.98609	0.00950535
ENSMUSG00000033578	Tmem35a	transmembrane protein 35A [Source:MGI Symbol;Acc:MGI:1914814]	131.7	7.66643	55.5268	15.8301	-1.98463	0.00141027
ENSMUSG00000041263	Rusc1	RUN and SH3 domain containing 1 [Source:MGI Symbol;Acc:MGI:1919546]	37.5362	1.15986	19.1254	5.50502	-1.96742	0.000659706
ENSMUSG00000004113	Cacna1b	calcium channel, voltage-dependent, N type, alpha 1B subunit [Source:MGI Symbol;Acc:MGI:88296]	35.7323	0.187929	24.4867	7.0345	-1.96403	0.000905897
ENSMUSG00000033419	Snap91	synaptosomal-associated protein 91 [Source:MGI Symbol;Acc:MGI:109132]	118.981	2.60205	87.0421	25.0779	-1.96276	0.000848966
ENSMUSG00000048834	Vstm2a	V-set and transmembrane domain containing 2A [Source:MGI Symbol;Acc:MGI:2384826]	24.4615	1.01018	22.5272	6.548	-1.95688	0.00082492
ENSMUSG00000031906	Smpd3	sphingomyelin phosphodiesterase 3, neutral [Source:MGI Symbol;Acc:MGI:1927578]	59.7573	0.694062	42.1125	12.2092	-1.95279	0.00110415
ENSMUSG00000026514	Cnih3	cornichon family AMPA receptor auxiliary protein 3 [Source:MGI Symbol;Acc:MGI:1920228]	34.0791	0.210643	22.8129	6.65935	-1.95072	0.000710556
ENSMUSG00000018012	Rac3	RAS-related C3 botulinum substrate 3 [Source:MGI Symbol;Acc:MGI:2180784]	187.381	17.739	70.1612	20.6215	-1.94908	0.000561414
ENSMUSG00000021194	Chga	chromogranin A [Source:MGI Symbol;Acc:MGI:88394]	69.3415	0.911248	59.1258	17.2973	-1.94788	0.00058443
ENSMUSG00000062296	Trank1	tetratricopeptide repeat and ankyrin repeat containing 1 [Source:MGI Symbol;Acc:MGI:1341834]	27.4216	0.161411	23.1638	6.74998	-1.94425	0.00646682
ENSMUSG00000043388	Tmem130	transmembrane protein 130 [Source:MGI Symbol;Acc:MGI:3607706]	119.425	0.426672	74.6787	21.8391	-1.94329	0.00178791
ENSMUSG00000020589	Fam49a	family with sequence similarity 49, member A [Source:MGI Symbol;Acc:MGI:1261783]	70.3429	4.83823	40.8769	11.992	-1.93573	0.00138512
ENSMUSG00000024897	Apba1	amyloid beta (A4) precursor protein binding, family A, member 1 [Source:MGI Symbol;Acc:MGI:1860297]	64.1232	3.15765	69.9955	20.5621	-1.93439	0.00063156
ENSMUSG00000026825	Dnm1	dynamin 1 [Source:MGI Symbol;Acc:MGI:107384]	120.98	0.831376	74.4636	21.9461	-1.93172	0.000721584
ENSMUSG00000029161	Cgref1	cell growth regulator with EF hand domain 1 [Source:MGI Symbol;Acc:MGI:1915817]	26.3013	1.99134	21.6127	6.39543	-1.92777	0.000941762
ENSMUSG00000048978	Nrsn1	neurensin 1 [Source:MGI Symbol;Acc:MGI:894662]	27.0992	0.288879	23.3711	6.92418	-1.92607	0.000520771
ENSMUSG00000003863	Ppfia3	protein tyrosine phosphatase, receptor type, f polypeptide (PTPRF), interacting protein (liprin), alpha 3 [Source:MGI Symbol;Acc:MGI:1924037]	33.1003	1.13547	36.9283	11.0362	-1.92277	0.000520771
ENSMUSG00000054728	Phactr1	phosphatase and actin regulator 1 [Source:MGI Symbol;Acc:MGI:2659021]	64.5927	5.6069	45.9893	13.6278	-1.921	0.001743
ENSMUSG00000026688	Mgst3	microsomal glutathione S-transferase 3 [Source:MGI Symbol;Acc:MGI:1913697]	91.5161	7.93144	44.9279	13.4051	-1.92051	0.000958184
ENSMUSG00000039431	Mtmr7	myotubularin related protein 7 [Source:MGI Symbol;Acc:MGI:1891693]	22.0027	0.767594	17.9977	5.34994	-1.91974	0.00181137
ENSMUSG00000039661	Dusp26	dual specificity phosphatase 26 (putative) [Source:MGI Symbol;Acc:MGI:1914209]	31.5248	0.145859	16.2624	4.88131	-1.91958	0.00280597
ENSMUSG00000040631	Dok4	docking protein 4 [Source:MGI Symbol;Acc:MGI:2148865]	58.0197	4.15129	17.612	5.27187	-1.91493	0.00113455
ENSMUSG00000021700	Rab3c	RAB3C, member RAS oncogene family [Source:MGI Symbol;Acc:MGI:1914545]	41.0981	0.15843	34.9825	10.4303	-1.90863	0.00359358
ENSMUSG00000049556	Lingo1	leucine rich repeat and Ig domain containing 1 [Source:MGI Symbol;Acc:MGI:1915522]	88.449	4.0405	78.3407	23.4669	-1.90842	0.000338109
ENSMUSG00000030302	Atp2b2	ATPase, Ca++ transporting, plasma membrane 2 [Source:MGI Symbol;Acc:MGI:105368]	31.6316	0.101428	29.6312	8.84497	-1.90749	0.00186971
ENSMUSG00000009394	Syn2	synapsin II [Source:MGI Symbol;Acc:MGI:103020]	85.3368	8.98293	74.8783	22.6152	-1.90405	0.000524047
ENSMUSG00000004961	Syt5	synaptotagmin V [Source:MGI Symbol;Acc:MGI:1926368]	142.191	4.47571	80.1433	24.1696	-1.90377	0.00121829
ENSMUSG00000041773	Enc1	ectodermal-neural cortex 1 [Source:MGI Symbol;Acc:MGI:109610]	238.254	16.4031	151.104	45.476	-1.90358	0.000561414
ENSMUSG00000026764	Kif5c	kinesin family member 5C [Source:MGI Symbol;Acc:MGI:1098269]	168.798	8.21202	127.627	38.4687	-1.90178	0.000501703
ENSMUSG00000022865	Cxadr	coxsackie virus and adenovirus receptor [Source:MGI Symbol;Acc:MGI:1201679]	88.8775	3.78039	78.7477	23.6813	-1.89958	0.00159562
ENSMUSG00000020436	Gabrg2	gamma-aminobutyric acid (GABA) A receptor, subunit gamma 2 [Source:MGI Symbol;Acc:MGI:95623]	45.9251	0.08721	17.8568	5.38951	-1.89613	0.00361919
ENSMUSG00000004110	Cacna1e	calcium channel, voltage-dependent, R type, alpha 1E subunit [Source:MGI Symbol;Acc:MGI:106217]	10.3975	0.476029	18.6268	5.60596	-1.88972	0.00759451
ENSMUSG00000029053	Prkcz	protein kinase C, zeta [Source:MGI Symbol;Acc:MGI:97602]	48.8192	0.707942	40.1618	12.3066	-1.88256	0.000639611
ENSMUSG00000033910	Gucy1a3	guanylate cyclase 1, soluble, alpha 3 [Source:MGI Symbol;Acc:MGI:1926562]	71.9927	0.264185	33.8413	10.2861	-1.88009	0.00926495
ENSMUSG00000027669	Gnb4	guanine nucleotide binding protein (G protein), beta 4 [Source:MGI Symbol;Acc:MGI:104581]	19.8081	0.445447	16.6001	5.11112	-1.8765	0.000491336
ENSMUSG00000029121	Crmp1	collapsin response mediator protein 1 [Source:MGI Symbol;Acc:MGI:107793]	600.86	4.4594	353.958	108.642	-1.87426	0.001093
ENSMUSG00000049281	Scn3b	sodium channel, voltage-gated, type III, beta [Source:MGI Symbol;Acc:MGI:1918882]	62.3088	4.9036	42.9027	13.1707	-1.86959	0.00328156
ENSMUSG00000030683	Sez6l2	seizure related 6 homolog like 2 [Source:MGI Symbol;Acc:MGI:2385295]	85.3639	0.776221	52.9927	16.2126	-1.86904	0.0063624
ENSMUSG00000069227	Gprin1	G protein-regulated inducer of neurite outgrowth 1 [Source:MGI Symbol;Acc:MGI:1349455]	97.2491	1.36644	70.2728	21.7699	-1.86406	0.000750632
ENSMUSG00000020577	Tspan13	tetraspanin 13 [Source:MGI Symbol;Acc:MGI:1913359]	176.106	6.19364	94.704	29.4345	-1.86043	0.000639611
ENSMUSG00000034187	Nsf	N-ethylmaleimide sensitive fusion protein [Source:MGI Symbol;Acc:MGI:104560]	126.416	10.3723	85.5146	26.6133	-1.85751	0.00148178
ENSMUSG00000021719	Rgs7bp	regulator of G-protein signalling 7 binding protein [Source:MGI Symbol;Acc:MGI:106334]	20.5627	0.410335	18.0515	5.58396	-1.85298	0.00766884
ENSMUSG00000037428	Vgf	VGF nerve growth factor inducible [Source:MGI Symbol;Acc:MGI:1343180]	53.4016	1.81557	67.6086	21.0916	-1.85088	0.000453635
ENSMUSG00000003153	Slc2a3	solute carrier family 2 (facilitated glucose transporter), member 3 [Source:MGI Symbol;Acc:MGI:95757]	33.2386	2.93738	25.7401	8.09228	-1.84553	0.000603262
ENSMUSG00000024172	St6gal2	beta galactoside alpha 2,6 sialyltransferase 2 [Source:MGI Symbol;Acc:MGI:2445190]	30.5649	0.291012	15.5955	4.86353	-1.84489	0.00822888
ENSMUSG00000025867	Cplx2	complexin 2 [Source:MGI Symbol;Acc:MGI:104726]	105.281	7.04844	125.806	39.7609	-1.84262	0.00104339
ENSMUSG00000056553	Ptprn2	protein tyrosine phosphatase, receptor type, N polypeptide 2 [Source:MGI Symbol;Acc:MGI:107418]	52.9709	5.18061	26.7018	8.40223	-1.83481	0.00182852
ENSMUSG00000038486	Sv2a	synaptic vesicle glycoprotein 2 a [Source:MGI Symbol;Acc:MGI:1927139]	128.166	5.52007	76.1324	24.1913	-1.83481	0.00061693
ENSMUSG00000044629	Cnrip1	cannabinoid receptor interacting protein 1 [Source:MGI Symbol;Acc:MGI:1917505]	110.779	8.17001	42.8968	13.5553	-1.83459	0.000848484
ENSMUSG00000029608	Rph3a	rabphilin 3A [Source:MGI Symbol;Acc:MGI:102788]	50.2981	0.115839	38.6616	12.2166	-1.8301	0.00206203
ENSMUSG00000024403	Atp6v1g2	ATPase, H+ transporting, lysosomal V1 subunit G2 [Source:MGI Symbol;Acc:MGI:1913487]	123.013	6.65196	60.7007	19.2374	-1.8295	0.00095256
ENSMUSG00000024873	Cnih2	cornichon family AMPA receptor auxiliary protein 2 [Source:MGI Symbol;Acc:MGI:1277225]	289.211	5.43217	181.384	57.9214	-1.82804	0.000895599
ENSMUSG00000025422	Agap2	ArfGAP with GTPase domain, ankyrin repeat and PH domain 2 [Source:MGI Symbol;Acc:MGI:3580016]	128.046	2.74347	93.3952	29.7965	-1.82097	0.000439149
ENSMUSG00000021268	Meg3	maternally expressed 3 [Source:MGI Symbol;Acc:MGI:1202886]	234.451	12.5918	215.156	68.3148	-1.81913	0.00178175
ENSMUSG00000040276	Pacsin1	protein kinase C and casein kinase substrate in neurons 1 [Source:MGI Symbol;Acc:MGI:1345181]	49.6174	2.00889	25.666	8.18415	-1.81826	0.00154217
ENSMUSG00000027221	Chst1	carbohydrate (keratan sulfate Gal-6) sulfotransferase 1 [Source:MGI Symbol;Acc:MGI:1924219]	57.3755	0.983791	34.9866	11.2554	-1.80903	0.000714888
ENSMUSG00000026204	Ptprn	protein tyrosine phosphatase, receptor type, N [Source:MGI Symbol;Acc:MGI:102765]	89.6465	1.0022	60.4941	19.4153	-1.80473	0.00437266
ENSMUSG00000058297	Spock2	sparc/osteonectin, cwcv and kazal-like domains proteoglycan 2 [Source:MGI Symbol;Acc:MGI:1891351]	132.965	0.392562	68.9884	22.2511	-1.80291	0.000798487
ENSMUSG00000006731	B4galnt1	beta-1,4-N-acetyl-galactosaminyl transferase 1 [Source:MGI Symbol;Acc:MGI:1342057]	54.1167	2.22357	28.1865	9.10853	-1.80281	0.000616162
ENSMUSG00000032452	Clstn2	calsyntenin 2 [Source:MGI Symbol;Acc:MGI:1929897]	24.8839	0.383676	16.9604	5.44888	-1.7999	0.00520782
ENSMUSG00000028351	Brinp1	bone morphogenic protein/retinoic acid inducible neural specific 1 [Source:MGI Symbol;Acc:MGI:1928478]	47.6693	2.00595	30.2101	9.78871	-1.79474	0.00575442
ENSMUSG00000028833	Ncdn	neurochondrin [Source:MGI Symbol;Acc:MGI:1347351]	208.352	20.2331	127.558	41.502	-1.79425	0.000706819
ENSMUSG00000037771	Slc32a1	solute carrier family 32 (GABA vesicular transporter), member 1 [Source:MGI Symbol;Acc:MGI:1194488]	49.6747	0.277274	28.888	9.54226	-1.78459	0.00438641
ENSMUSG00000000560	Gabra2	gamma-aminobutyric acid (GABA) A receptor, subunit alpha 2 [Source:MGI Symbol;Acc:MGI:95614]	58.7151	0.420249	36.9187	11.9281	-1.78404	0.0186309
ENSMUSG00000002012	Pnck	pregnancy upregulated non-ubiquitously expressed CaM kinase [Source:MGI Symbol;Acc:MGI:1347357]	106.231	2.03136	24.7118	8.16988	-1.78273	0.0043651
ENSMUSG00000004698	Hdac9	histone deacetylase 9 [Source:MGI Symbol;Acc:MGI:1931221]	21.9273	1.73967	16.0682	5.22594	-1.78161	0.00695612
ENSMUSG00000034336	Ina	internexin neuronal intermediate filament protein, alpha [Source:MGI Symbol;Acc:MGI:96568]	154.044	1.15549	95.3386	31.0546	-1.78091	0.00376894
ENSMUSG00000040867	Begain	brain-enriched guanylate kinase-associated [Source:MGI Symbol;Acc:MGI:3044626]	30.1455	0.755221	25.01	8.21932	-1.77703	0.00192268
ENSMUSG00000058441	Panx2	pannexin 2 [Source:MGI Symbol;Acc:MGI:1890615]	25.7601	0.362636	17.2264	5.66593	-1.77302	0.00140003
ENSMUSG00000079598	Clec2l	C-type lectin domain family 2, member L [Source:MGI Symbol;Acc:MGI:2141402]	28.3623	0.582158	21.9638	7.28299	-1.77052	0.00254201
ENSMUSG00000022577	Ly6h	lymphocyte antigen 6 complex, locus H [Source:MGI Symbol;Acc:MGI:1346030]	129.84	3.53011	88.587	29.5018	-1.76843	0.00155744
ENSMUSG00000062257	Opcml	opioid binding protein/cell adhesion molecule-like [Source:MGI Symbol;Acc:MGI:97397]	33.5442	0.502231	43.1949	14.1561	-1.76795	0.00680426
ENSMUSG00000037217	Syn1	synapsin I [Source:MGI Symbol;Acc:MGI:98460]	154.605	4.38697	90.9689	29.6646	-1.76682	0.0266741
ENSMUSG00000021066	Atl1	atlastin GTPase 1 [Source:MGI Symbol;Acc:MGI:1921241]	20.7452	1.47115	17.7718	5.93035	-1.76063	0.00188481
ENSMUSG00000042388	Dlgap3	discs, large (Drosophila) homolog-associated protein 3 [Source:MGI Symbol;Acc:MGI:3039563]	41.444	0.730427	48.5003	16.2417	-1.7579	0.000920604
ENSMUSG00000024743	Syt7	synaptotagmin VII [Source:MGI Symbol;Acc:MGI:1859545]	26.3635	0.15895	25.8627	8.60979	-1.75436	0.00135558
ENSMUSG00000046449	C77370	expressed sequence C77370 [Source:MGI Symbol;Acc:MGI:2148050]	17.2744	0.308856	16.0156	5.30057	-1.75199	0.0170575
ENSMUSG00000029712	Actl6b	actin-like 6B [Source:MGI Symbol;Acc:MGI:1933548]	55.0927	0.485171	21.4023	7.2199	-1.7481	0.00205714
ENSMUSG00000040037	Negr1	neuronal growth regulator 1 [Source:MGI Symbol;Acc:MGI:2444846]	67.3693	5.37237	56.857	19.2173	-1.73694	0.00210507
ENSMUSG00000005338	Cadm3	cell adhesion molecule 3 [Source:MGI Symbol;Acc:MGI:2137858]	131.277	6.86593	110.523	37.334	-1.73429	0.000791921
ENSMUSG00000020262	Adarb1	adenosine deaminase, RNA-specific, B1 [Source:MGI Symbol;Acc:MGI:891999]	22.7584	1.67096	17.1447	5.82686	-1.72728	0.00151068
ENSMUSG00000007944	Ttc9b	tetratricopeptide repeat domain 9B [Source:MGI Symbol;Acc:MGI:1920282]	38.1	0.472423	30.0863	10.3682	-1.72416	0.00686371
ENSMUSG00000035033	Tbr1	T-box brain gene 1 [Source:MGI Symbol;Acc:MGI:107404]	29.4103	0.062861	18.0048	6.069	-1.72319	0.0509758
ENSMUSG00000001227	Sema6b	sema domain, transmembrane domain (TM), and cytoplasmic domain, (semaphorin) 6B [Source:MGI Symbol;Acc:MGI:1202889]	25.3502	1.11242	34.2827	11.8176	-1.72066	0.00284148
ENSMUSG00000029861	Fam131b	family with sequence similarity 131, member B [Source:MGI Symbol;Acc:MGI:1923406]	37.6691	0.660277	19.1183	6.57909	-1.71723	0.00178958
ENSMUSG00000026259	Ngef	neuronal guanine nucleotide exchange factor [Source:MGI Symbol;Acc:MGI:1858414]	53.5948	4.2297	32.9053	11.2868	-1.71702	0.000720111
ENSMUSG00000051062	Fbll1	fibrillarin-like 1 [Source:MGI Symbol;Acc:MGI:3034689]	23.9421	0.284104	20.1317	6.97803	-1.71514	0.00864092
ENSMUSG00000040118	Cacna2d1	calcium channel, voltage-dependent, alpha2/delta subunit 1 [Source:MGI Symbol;Acc:MGI:88295]	41.1519	4.34065	24.6271	8.42414	-1.70936	0.0065367
ENSMUSG00000079157	Fam155a	family with sequence similarity 155, member A [Source:MGI Symbol;Acc:MGI:2142765]	17.3247	0.325955	21.5732	7.44789	-1.70753	0.00172245
ENSMUSG00000022840	Adcy5	adenylate cyclase 5 [Source:MGI Symbol;Acc:MGI:99673]	25.9998	2.55793	21.9078	7.59681	-1.7014	0.000894694
ENSMUSG00000027834	Serpini1	serine (or cysteine) peptidase inhibitor, clade I, member 1 [Source:MGI Symbol;Acc:MGI:1194506]	53.6411	2.22727	20.8098	7.21228	-1.69907	0.00127272
ENSMUSG00000025558	Dock9	dedicator of cytokinesis 9 [Source:MGI Symbol;Acc:MGI:106321]	34.8644	3.51456	19.788	6.89478	-1.68731	0.00250943
ENSMUSG00000021314	Amph	amphiphysin [Source:MGI Symbol;Acc:MGI:103574]	94.3809	4.49025	56.2394	19.7547	-1.67979	0.00260449
ENSMUSG00000057614	Gnai1	guanine nucleotide binding protein (G protein), alpha inhibiting 1 [Source:MGI Symbol;Acc:MGI:95771]	88.677	7.5587	81.203	28.6739	-1.67568	0.00144751
ENSMUSG00000042078	Svop	SV2 related protein [Source:MGI Symbol;Acc:MGI:1915916]	66.5308	4.22813	39.005	13.9487	-1.6695	0.00625079
ENSMUSG00000096847	Tmem151b	transmembrane protein 151B [Source:MGI Symbol;Acc:MGI:2685169]	23.4759	0.766751	24.7171	8.8749	-1.66207	0.0044576
ENSMUSG00000025777	Gdap1	ganglioside-induced differentiation-associated-protein 1 [Source:MGI Symbol;Acc:MGI:1338002]	56.2386	0.822588	41.0358	14.589	-1.66078	0.00194712
ENSMUSG00000040035	Disp2	dispatched RND tramsporter family member 2 [Source:MGI Symbol;Acc:MGI:2388733]	41.4993	0.828137	24.9883	8.79208	-1.65904	0.0260426
ENSMUSG00000027612	Mmp24	matrix metallopeptidase 24 [Source:MGI Symbol;Acc:MGI:1341867]	47.9892	0.293622	28.8342	10.2835	-1.65844	0.0020689
ENSMUSG00000051703	Tmem198	transmembrane protein 198 [Source:MGI Symbol;Acc:MGI:2443133]	20.7165	1.42345	18.0975	6.52596	-1.65258	0.00344527
ENSMUSG00000042401	Crtac1	cartilage acidic protein 1 [Source:MGI Symbol;Acc:MGI:1920082]	37.2732	0.540826	16.023	5.81291	-1.63946	0.00222465
ENSMUSG00000041141	Pnmal1	PNMA-like 1 [Source:MGI Symbol;Acc:MGI:1918941]	33.0039	1.08275	17.2846	6.30191	-1.63041	0.00254553
ENSMUSG00000009216	Fam163b	family with sequence similarity 163, member B [Source:MGI Symbol;Acc:MGI:1926106]	34.7702	0.0842011	34.8051	12.5719	-1.62912	0.0153145
ENSMUSG00000050822	Slc29a4	solute carrier family 29 (nucleoside transporters), member 4 [Source:MGI Symbol;Acc:MGI:2385330]	70.7577	0.978624	56.2446	20.4556	-1.62303	0.00607961
ENSMUSG00000003500	Impdh1	inosine monophosphate dehydrogenase 1 [Source:MGI Symbol;Acc:MGI:96567]	45.6443	3.04059	30.2886	11.1443	-1.621	0.00307331
ENSMUSG00000029126	Nsg1	neuron specific gene family member 1 [Source:MGI Symbol;Acc:MGI:109149]	340.838	11.4148	172.28	63.641	-1.6184	0.00300088
ENSMUSG00000030747	Dgat2	diacylglycerol O-acyltransferase 2 [Source:MGI Symbol;Acc:MGI:1915050]	21.5611	1.32356	20.3604	7.53999	-1.61306	0.00323338
ENSMUSG00000042066	Tmcc2	transmembrane and coiled-coil domains 2 [Source:MGI Symbol;Acc:MGI:1916125]	44.6158	3.7904	46.489	17.2623	-1.61299	0.00507501
ENSMUSG00000097451	Rian	RNA imprinted and accumulated in nucleus [Source:MGI Symbol;Acc:MGI:1922995]	123.965	7.62903	83.9774	30.8378	-1.61114	0.00694954
ENSMUSG00000043004	Gng2	guanine nucleotide binding protein (G protein), gamma 2 [Source:MGI Symbol;Acc:MGI:102705]	272.115	2.21502	142.101	52.4722	-1.59921	0.0113586
ENSMUSG00000040570	Rundc3b	RUN domain containing 3B [Source:MGI Symbol;Acc:MGI:2685286]	22.1331	0.200069	14.9061	5.55665	-1.59456	0.00353778
ENSMUSG00000054423	Cadps	Ca2+-dependent secretion activator [Source:MGI Symbol;Acc:MGI:1350922]	42.5266	4.42482	31.9185	11.9357	-1.59195	0.00286068
ENSMUSG00000069601	Ank3	ankyrin 3, epithelial [Source:MGI Symbol;Acc:MGI:88026]	35.6668	0.6621	52.4348	19.3083	-1.59181	0.0383845
ENSMUSG00000006651	Aplp1	amyloid beta (A4) precursor-like protein 1 [Source:MGI Symbol;Acc:MGI:88046]	474.536	22.7238	325.824	122.512	-1.59006	0.00273571
ENSMUSG00000050379	2006-09-01	septin 6 [Source:MGI Symbol;Acc:MGI:1888939]	33.7471	1.94414	22.5014	8.4616	-1.58284	0.00386813
ENSMUSG00000061751	Kalrn	kalirin, RhoGEF kinase [Source:MGI Symbol;Acc:MGI:2685385]	14.8977	1.43851	20.2585	7.60791	-1.57919	0.00533884
ENSMUSG00000028832	Stmn1	stathmin 1 [Source:MGI Symbol;Acc:MGI:96739]	564.8	20.673	674.023	255.042	-1.579	0.00278294
ENSMUSG00000038738	Shank1	SH3/ankyrin domain gene 1 [Source:MGI Symbol;Acc:MGI:3613677]	29.6208	0.2481	37.482	13.953	-1.57877	0.0211341
ENSMUSG00000061576	Dpp6	dipeptidylpeptidase 6 [Source:MGI Symbol;Acc:MGI:94921]	58.8453	0.693563	41.3765	15.5066	-1.57872	0.0136648
ENSMUSG00000030000	Add2	adducin 2 (beta) [Source:MGI Symbol;Acc:MGI:87919]	54.1652	0.865884	36.6611	13.8216	-1.57738	0.0054083
ENSMUSG00000051391	Ywhag	tyrosine 3-monooxygenase/tryptophan 5-monooxygenase activation protein, gamma polypeptide [Source:MGI Symbol;Acc:MGI:108109]	531.549	55.8461	401.329	152.537	-1.56648	0.00212118
ENSMUSG00000003934	Efnb3	ephrin B3 [Source:MGI Symbol;Acc:MGI:109196]	120.772	1.10034	80.663	30.7864	-1.56433	0.0017384
ENSMUSG00000038264	Sema7a	sema domain, immunoglobulin domain (Ig), and GPI membrane anchor, (semaphorin) 7A [Source:MGI Symbol;Acc:MGI:1306826]	33.1486	3.40887	18.69	7.16237	-1.55746	0.00222185
ENSMUSG00000030600	Lrfn1	leucine rich repeat and fibronectin type III domain containing 1 [Source:MGI Symbol;Acc:MGI:2136810]	27.9708	1.92014	29.6941	11.4212	-1.55176	0.00221677
ENSMUSG00000045763	Basp1	brain abundant, membrane attached signal protein 1 [Source:MGI Symbol;Acc:MGI:1917600]	634.949	31.0131	619.239	239.242	-1.55041	0.00334996
ENSMUSG00000058589	Anks1b	ankyrin repeat and sterile alpha motif domain containing 1B [Source:MGI Symbol;Acc:MGI:1924781]	26.6386	1.17786	24.2626	9.29756	-1.55039	0.00501917
ENSMUSG00000026797	Stxbp1	syntaxin binding protein 1 [Source:MGI Symbol;Acc:MGI:107363]	260.491	14.6829	154.375	58.7961	-1.55	0.0205101
ENSMUSG00000034818	Celf5	CUGBP, Elav-like family member 5 [Source:MGI Symbol;Acc:MGI:2442333]	100.595	3.35452	57.2727	21.9175	-1.54459	0.0183615
ENSMUSG00000050711	Scg2	secretogranin II [Source:MGI Symbol;Acc:MGI:103033]	122.363	1.255	88.8177	34.0628	-1.5433	0.0114561
ENSMUSG00000038390	Gpr162	G protein-coupled receptor 162 [Source:MGI Symbol;Acc:MGI:1315214]	52.1902	3.54624	40.3328	15.7497	-1.54149	0.0100973
ENSMUSG00000053693	Mast1	microtubule associated serine/threonine kinase 1 [Source:MGI Symbol;Acc:MGI:1861901]	59.055	0.508177	22.5366	8.697	-1.53411	0.016619
ENSMUSG00000025318	Jph3	junctophilin 3 [Source:MGI Symbol;Acc:MGI:1891497]	33.7913	0.525049	30.7882	12.1019	-1.52882	0.00684129
ENSMUSG00000034958	Atcay	ataxia, cerebellar, Cayman type [Source:MGI Symbol;Acc:MGI:2448730]	116.363	1.67496	64.4718	25.2134	-1.52859	0.00364523
ENSMUSG00000072214	2005-09-01	septin 5 [Source:MGI Symbol;Acc:MGI:1195461]	206.696	20.8488	153.29	59.955	-1.52706	0.00376651
ENSMUSG00000045589	Frrs1l	ferric-chelate reductase 1 like [Source:MGI Symbol;Acc:MGI:2442704]	23.6094	1.7211	17.5152	6.82688	-1.52668	0.0101281
ENSMUSG00000052889	Prkcb	protein kinase C, beta [Source:MGI Symbol;Acc:MGI:97596]	58.4228	1.9355	72.8291	28.5719	-1.51606	0.00971858
ENSMUSG00000037990	Sh3rf3	SH3 domain containing ring finger 3 [Source:MGI Symbol;Acc:MGI:2444637]	24.481	1.27906	16.1162	6.33707	-1.51239	0.00493937
ENSMUSG00000046178	Nxph1	neurexophilin 1 [Source:MGI Symbol;Acc:MGI:107492]	33.08	1.05093	15.7102	6.22926	-1.51132	0.00459089
ENSMUSG00000016179	Camk1g	calcium/calmodulin-dependent protein kinase I gamma [Source:MGI Symbol;Acc:MGI:2388073]	33.5322	0.410648	17.0882	6.75437	-1.50807	0.0121749
ENSMUSG00000004366	Sst	somatostatin [Source:MGI Symbol;Acc:MGI:98326]	324.223	0.0600919	256.872	101.855	-1.50666	0.0152083
ENSMUSG00000044433	Camsap3	calmodulin regulated spectrin-associated protein family, member 3 [Source:MGI Symbol;Acc:MGI:1916947]	32.4699	0.610738	18.2372	7.22663	-1.49889	0.010168
ENSMUSG00000094910	D430019H16Rik	RIKEN cDNA D430019H16 gene [Source:MGI Symbol;Acc:MGI:2443127]	78.9019	1.19351	49.5449	19.9185	-1.48735	0.00653044
ENSMUSG00000015981	Stk32c	serine/threonine kinase 32C [Source:MGI Symbol;Acc:MGI:2385336]	29.8761	0.715071	16.4603	6.65773	-1.48603	0.00960261
ENSMUSG00000028546	Elavl4	ELAV (embryonic lethal, abnormal vision, Drosophila)-like 4 (Hu antigen D) [Source:MGI Symbol;Acc:MGI:107427]	34.0209	0.359482	21.8817	8.7473	-1.48191	0.0314406
ENSMUSG00000032589	Bsn	bassoon [Source:MGI Symbol;Acc:MGI:1277955]	15.7502	0.203611	18.2666	7.26551	-1.48179	0.0418305
ENSMUSG00000031137	Fgf13	fibroblast growth factor 13 [Source:MGI Symbol;Acc:MGI:109178]	102.585	2.90704	44.4544	17.7862	-1.48155	0.017745
ENSMUSG00000041362	Shtn1	shootin 1 [Source:MGI Symbol;Acc:MGI:1918903]	48.4808	2.64068	40.912	16.4483	-1.47884	0.0101515
ENSMUSG00000040972	Igsf21	immunoglobulin superfamily, member 21 [Source:MGI Symbol;Acc:MGI:2681842]	21.3128	0.884701	41.7159	16.9108	-1.4769	0.00435358
ENSMUSG00000048240	Gng7	guanine nucleotide binding protein (G protein), gamma 7 [Source:MGI Symbol;Acc:MGI:95787]	81.2984	7.66705	41.0882	16.7717	-1.46357	0.00387542
ENSMUSG00000048078	Tenm4	teneurin transmembrane protein 4 [Source:MGI Symbol;Acc:MGI:2447063]	14.8317	0.602568	14.4339	5.87537	-1.45531	0.0203969
ENSMUSG00000042216	Sgsm1	small G protein signaling modulator 1 [Source:MGI Symbol;Acc:MGI:107320]	24.134	2.13918	14.7028	6.05866	-1.44901	0.00833935
ENSMUSG00000057716	Tmem178b	transmembrane protein 178B [Source:MGI Symbol;Acc:MGI:3647581]	47.3467	1.60303	50.2204	20.6516	-1.44355	0.0195873
ENSMUSG00000052727	Map1b	microtubule-associated protein 1B [Source:MGI Symbol;Acc:MGI:1306778]	194.612	13.0453	266.932	108.962	-1.44196	0.0620632
ENSMUSG00000027560	Dok5	docking protein 5 [Source:MGI Symbol;Acc:MGI:1924079]	62.362	5.04842	38.8652	16.1753	-1.43726	0.00359105
ENSMUSG00000039716	Dock3	dedicator of cyto-kinesis 3 [Source:MGI Symbol;Acc:MGI:2429763]	32.3072	3.16861	22.5921	9.35973	-1.4354	0.010686
ENSMUSG00000048895	Cdk5r1	cyclin-dependent kinase 5, regulatory subunit 1 (p35) [Source:MGI Symbol;Acc:MGI:101764]	119.492	1.66443	96.9434	40.6317	-1.43122	0.00727709
ENSMUSG00000062444	Ap3b2	adaptor-related protein complex 3, beta 2 subunit [Source:MGI Symbol;Acc:MGI:1100869]	80.9575	3.57033	49.9352	20.8956	-1.43107	0.00627452
ENSMUSG00000029168	Dpysl5	dihydropyrimidinase-like 5 [Source:MGI Symbol;Acc:MGI:1929772]	288.795	28.3772	172.221	71.5335	-1.42971	0.0133511
ENSMUSG00000055022	Cntn1	contactin 1 [Source:MGI Symbol;Acc:MGI:105980]	100.152	10.2293	91.4485	38.2233	-1.4274	0.0072013
ENSMUSG00000025020	Slit1	slit homolog 1 (Drosophila) [Source:MGI Symbol;Acc:MGI:1315203]	21.1802	0.2654	19.1726	7.9746	-1.42504	0.0176588
ENSMUSG00000027525	Phactr3	phosphatase and actin regulator 3 [Source:MGI Symbol;Acc:MGI:1921439]	26.2259	0.227929	22.4145	9.4379	-1.42229	0.00453256
ENSMUSG00000044647	Csrnp3	cysteine-serine-rich nuclear protein 3 [Source:MGI Symbol;Acc:MGI:1925021]	19.5627	0.118253	16.5809	6.96655	-1.41408	0.0268636
ENSMUSG00000024501	Dpysl3	dihydropyrimidinase-like 3 [Source:MGI Symbol;Acc:MGI:1349762]	593.16	43.5275	449.19	189.987	-1.41137	0.00784048
ENSMUSG00000022523	Fgf12	fibroblast growth factor 12 [Source:MGI Symbol;Acc:MGI:109183]	38.7133	3.06285	37.9261	15.9918	-1.40915	0.0195873
ENSMUSG00000018411	Mapt	microtubule-associated protein tau [Source:MGI Symbol;Acc:MGI:97180]	401.849	20.1533	281.698	118.793	-1.40821	0.0119599
ENSMUSG00000025237	Parp6	poly (ADP-ribose) polymerase family, member 6 [Source:MGI Symbol;Acc:MGI:1914537]	77.4691	5.14998	40.4393	17.1602	-1.40034	0.0298786
ENSMUSG00000032890	Rims3	regulating synaptic membrane exocytosis 3 [Source:MGI Symbol;Acc:MGI:2443331]	14.9416	0.690172	14.972	6.40645	-1.39445	0.00702057
ENSMUSG00000030401	Rtn2	reticulon 2 (Z-band associated protein) [Source:MGI Symbol;Acc:MGI:107612]	48.0747	3.1342	31.2677	13.4485	-1.39396	0.0094715
ENSMUSG00000020524	Gria1	glutamate receptor, ionotropic, AMPA1 (alpha 1) [Source:MGI Symbol;Acc:MGI:95808]	85.6823	5.64707	62.2641	26.8023	-1.39019	0.00743123
ENSMUSG00000031104	Rab33a	RAB33A, member RAS oncogene family [Source:MGI Symbol;Acc:MGI:109493]	24.4393	0.596403	17.1966	7.49087	-1.38659	0.0563833
ENSMUSG00000026787	Gad2	glutamic acid decarboxylase 2 [Source:MGI Symbol;Acc:MGI:95634]	38.8017	0.120985	24.9639	10.7212	-1.38313	0.0337707
ENSMUSG00000062184	Hs6st2	heparan sulfate 6-O-sulfotransferase 2 [Source:MGI Symbol;Acc:MGI:1354959]	23.4515	0.462143	14.5272	6.25119	-1.38257	0.0376791
ENSMUSG00000024268	Celf4	CUGBP, Elav-like family member 4 [Source:MGI Symbol;Acc:MGI:1932407]	131.605	3.30969	139.483	60.1682	-1.37917	0.0171355
ENSMUSG00000008489	Elavl2	ELAV (embryonic lethal, abnormal vision, Drosophila)-like 2 (Hu antigen B) [Source:MGI Symbol;Acc:MGI:1100887]	31.0092	0.555951	25.0654	10.8786	-1.36691	0.023702
ENSMUSG00000020297	Nsg2	neuron specific gene family member 2 [Source:MGI Symbol;Acc:MGI:1202070]	689.26	42.741	392.637	172.302	-1.36688	0.0103381
ENSMUSG00000030223	Ptpro	protein tyrosine phosphatase, receptor type, O [Source:MGI Symbol;Acc:MGI:1097152]	47.8706	1.00444	27.8034	12.1523	-1.36039	0.016619
ENSMUSG00000031778	Cx3cl1	chemokine (C-X3-C motif) ligand 1 [Source:MGI Symbol;Acc:MGI:1097153]	78.2068	6.08648	70.4348	30.855	-1.35736	0.018793
ENSMUSG00000020331	Hcn2	hyperpolarization-activated, cyclic nucleotide-gated K+ 2 [Source:MGI Symbol;Acc:MGI:1298210]	18.3335	1.24122	16.2718	7.16653	-1.35273	0.0110776
ENSMUSG00000027799	Nbea	neurobeachin [Source:MGI Symbol;Acc:MGI:1347075]	46.7116	4.00453	42.6037	18.8019	-1.34571	0.0167137
ENSMUSG00000028347	Tmeff1	transmembrane protein with EGF-like and two follistatin-like domains 1 [Source:MGI Symbol;Acc:MGI:1926810]	78.8771	2.172	59.3126	26.3714	-1.34235	0.00807507
ENSMUSG00000022211	Carmil3	capping protein regulator and myosin 1 linker 3 [Source:MGI Symbol;Acc:MGI:2448573]	46.7197	1.73527	21.7134	9.63398	-1.34066	0.00876381
ENSMUSG00000072875	Gpr27	G protein-coupled receptor 27 [Source:MGI Symbol;Acc:MGI:1202299]	41.8673	0.604158	25.9665	11.6142	-1.33915	0.0130913
ENSMUSG00000033022	Cdo1	cysteine dioxygenase 1, cytosolic [Source:MGI Symbol;Acc:MGI:105925]	29.522	2.27544	22.7973	10.2415	-1.33565	0.0254484
ENSMUSG00000018474	Chd3	chromodomain helicase DNA binding protein 3 [Source:MGI Symbol;Acc:MGI:1344395]	132.045	11.1248	119.704	53.9212	-1.32826	0.0123479
ENSMUSG00000041642	Kif21b	kinesin family member 21B [Source:MGI Symbol;Acc:MGI:109234]	76.1521	2.88096	61.6898	27.5843	-1.32178	0.0254893
ENSMUSG00000068373	D430041D05Rik	RIKEN cDNA D430041D05 gene [Source:MGI Symbol;Acc:MGI:2181743]	18.8225	0.258227	13.9084	6.2509	-1.3134	0.03381
ENSMUSG00000036699	Zcchc12	zinc finger, CCHC domain containing 12 [Source:MGI Symbol;Acc:MGI:1919943]	95.8787	8.98122	46.7411	21.3524	-1.31142	0.0223094
ENSMUSG00000025272	Tro	trophinin [Source:MGI Symbol;Acc:MGI:1928994]	48.2171	4.8595	31.5762	14.3338	-1.31092	0.0114561
ENSMUSG00000022773	Ypel1	yippee-like 1 (Drosophila) [Source:MGI Symbol;Acc:MGI:1913303]	57.3132	2.45679	18.207	8.32364	-1.3088	0.0298656
ENSMUSG00000002997	Prkar2b	protein kinase, cAMP dependent regulatory, type II beta [Source:MGI Symbol;Acc:MGI:97760]	96.4384	2.66621	55.9104	25.6256	-1.29715	0.0132095
ENSMUSG00000037169	Mycn	v-myc avian myelocytomatosis viral related oncogene, neuroblastoma derived [Source:MGI Symbol;Acc:MGI:97357]	23.3239	0.728986	17.1375	7.85407	-1.29654	0.013474
ENSMUSG00000038244	Mical2	microtubule associated monooxygenase, calponin and LIM domain containing 2 [Source:MGI Symbol;Acc:MGI:2444947]	42.3326	2.18892	21.3299	9.6766	-1.29603	0.0697117
ENSMUSG00000072966	Gprasp2	G protein-coupled receptor associated sorting protein 2 [Source:MGI Symbol;Acc:MGI:2442071]	52.7336	4.92635	22.1049	10.2014	-1.29083	0.0112955
ENSMUSG00000058153	Sez6l	seizure related 6 homolog like [Source:MGI Symbol;Acc:MGI:1935121]	43.254	0.738969	37.5432	17.1805	-1.28645	0.0290166
ENSMUSG00000023033	Scn8a	sodium channel, voltage-gated, type VIII, alpha [Source:MGI Symbol;Acc:MGI:103169]	12.2935	0.8698	17.9738	8.23557	-1.28486	0.0333981
ENSMUSG00000023868	Pde10a	phosphodiesterase 10A [Source:MGI Symbol;Acc:MGI:1345143]	21.7873	1.52566	14.5175	6.68464	-1.28318	0.0326852
ENSMUSG00000053550	Shisa7	shisa family member 7 [Source:MGI Symbol;Acc:MGI:3605641]	22.8094	0.321986	22.0391	10.0866	-1.28102	0.112335
ENSMUSG00000025375	Aatk	apoptosis-associated tyrosine kinase [Source:MGI Symbol;Acc:MGI:1197518]	32.6527	2.33168	24.2603	11.3225	-1.27508	0.0114742
ENSMUSG00000051243	Islr2	immunoglobulin superfamily containing leucine-rich repeat 2 [Source:MGI Symbol;Acc:MGI:2444277]	78.0614	1.50435	33.5454	15.6407	-1.26869	0.0361211
ENSMUSG00000003279	Dlgap1	discs, large (Drosophila) homolog-associated protein 1 [Source:MGI Symbol;Acc:MGI:1346065]	34.1157	2.0698	31.3687	14.6234	-1.26705	0.0170587
ENSMUSG00000021303	Gng4	guanine nucleotide binding protein (G protein), gamma 4 [Source:MGI Symbol;Acc:MGI:102703]	47.74	0.700808	51.6429	24.1782	-1.2649	0.0293821
ENSMUSG00000048814	Lonrf2	LON peptidase N-terminal domain and ring finger 2 [Source:MGI Symbol;Acc:MGI:1920209]	35.8224	0.992057	29.6155	13.7684	-1.26336	0.0527546
ENSMUSG00000036422	Pcdh8	protocadherin 8 [Source:MGI Symbol;Acc:MGI:1306800]	40.1726	1.23205	24.073	11.3637	-1.26124	0.0184551
ENSMUSG00000044628	Rnf208	ring finger protein 208 [Source:MGI Symbol;Acc:MGI:1916096]	83.5114	3.54414	53.001	25.0616	-1.24215	0.0400992
ENSMUSG00000033342	Plppr5	phospholipid phosphatase related 5 [Source:MGI Symbol;Acc:MGI:1923019]	24.5603	0.870431	21.6213	10.2387	-1.24109	0.0539635
ENSMUSG00000050071	Bex1	brain expressed X-linked 1 [Source:MGI Symbol;Acc:MGI:1328321]	70.5852	7.34054	36.7314	17.7317	-1.2402	0.10185
ENSMUSG00000058966	Fam57b	family with sequence similarity 57, member B [Source:MGI Symbol;Acc:MGI:1916202]	69.9842	1.23519	42.9174	20.5201	-1.22894	0.0248738
ENSMUSG00000022623	Shank3	SH3/ankyrin domain gene 3 [Source:MGI Symbol;Acc:MGI:1930016]	21.3765	1.6954	25.7902	12.4043	-1.22397	0.0130512
ENSMUSG00000043419	Chd3os	chromodomain helicase DNA binding protein 3, opposite strand [Source:MGI Symbol;Acc:MGI:1915359]	40.5683	2.88863	22.6425	11.0071	-1.22083	0.036816
ENSMUSG00000028137	Celf3	CUGBP, Elav-like family member 3 [Source:MGI Symbol;Acc:MGI:1926034]	114.099	1.00349	55.1167	26.5013	-1.22014	0.0504218
ENSMUSG00000043857	Mgat5b	mannoside acetylglucosaminyltransferase 5, isoenzyme B [Source:MGI Symbol;Acc:MGI:3606200]	38.0697	0.403894	25.3944	12.3287	-1.21345	0.0165499
ENSMUSG00000036913	Trim67	tripartite motif-containing 67 [Source:MGI Symbol;Acc:MGI:3045323]	31.5938	1.34755	20.5319	10.0489	-1.1874	0.0765718
ENSMUSG00000052135	Foxo6	forkhead box O6 [Source:MGI Symbol;Acc:MGI:2676586]	20.6002	1.13082	15.7004	7.81756	-1.18449	0.0384243
ENSMUSG00000030226	Lmo3	LIM domain only 3 [Source:MGI Symbol;Acc:MGI:102810]	36.923	0.730579	28.0726	13.9665	-1.17448	0.0599335
ENSMUSG00000055629	B4galnt4	beta-1,4-N-acetyl-galactosaminyl transferase 4 [Source:MGI Symbol;Acc:MGI:2652891]	40.5125	1.34902	24.1742	12.0856	-1.17322	0.024332
ENSMUSG00000042155	Klhl23	kelch-like 23 [Source:MGI Symbol;Acc:MGI:2683536]	36.0088	3.68747	26.0843	13.1146	-1.16813	0.0301149
ENSMUSG00000056602	Fry	FRY microtubule binding protein [Source:MGI Symbol;Acc:MGI:2443895]	16.9099	0.789134	16.8865	8.367	-1.16687	0.1147
ENSMUSG00000020312	Shc2	SHC (Src homology 2 domain containing) transforming protein 2 [Source:MGI Symbol;Acc:MGI:106180]	19.5948	0.985383	13.5803	6.88101	-1.16003	0.043688
ENSMUSG00000051146	Camk2n2	calcium/calmodulin-dependent protein kinase II inhibitor 2 [Source:MGI Symbol;Acc:MGI:1920297]	85.7497	5.05882	56.2961	28.5336	-1.15634	0.0292685
ENSMUSG00000038453	Srcin1	SRC kinase signaling inhibitor 1 [Source:MGI Symbol;Acc:MGI:1933179]	45.6237	3.77912	45.0368	22.7511	-1.15331	0.0208841
ENSMUSG00000061080	Lsamp	limbic system-associated membrane protein [Source:MGI Symbol;Acc:MGI:1261760]	39.5066	2.31562	42.8488	21.683	-1.14822	0.0293502
ENSMUSG00000053046	Brsk2	BR serine/threonine kinase 2 [Source:MGI Symbol;Acc:MGI:1923020]	49.398	3.33526	34.6693	17.6443	-1.14625	0.0282401
ENSMUSG00000035835	Plppr3	phospholipid phosphatase related 3 [Source:MGI Symbol;Acc:MGI:2388640]	139.671	2.46852	51.2327	26.0931	-1.14525	0.0292591
ENSMUSG00000031442	Mcf2l	mcf.2 transforming sequence-like [Source:MGI Symbol;Acc:MGI:103263]	53.9543	3.81144	33.0234	16.8231	-1.1433	0.0293317
ENSMUSG00000022619	Mapk8ip2	mitogen-activated protein kinase 8 interacting protein 2 [Source:MGI Symbol;Acc:MGI:1926555]	55.1256	2.61767	44.0682	22.6366	-1.13846	0.0323298
ENSMUSG00000017943	Gdap1l1	ganglioside-induced differentiation-associated protein 1-like 1 [Source:MGI Symbol;Acc:MGI:2385163]	70.7482	6.59687	40.2093	20.6676	-1.13145	0.0403567
ENSMUSG00000043843	Tmem145	transmembrane protein 145 [Source:MGI Symbol;Acc:MGI:3607779]	50.8924	0.745166	21.8623	11.2352	-1.1251	0.0480579
ENSMUSG00000031028	Tub	tubby bipartite transcription factor [Source:MGI Symbol;Acc:MGI:2651573]	73.7318	2.27729	37.428	19.6518	-1.09712	0.0382971
ENSMUSG00000038910	Plcl2	phospholipase C-like 2 [Source:MGI Symbol;Acc:MGI:1352756]	18.3687	0.801003	16.3201	8.60946	-1.09188	0.0502748
ENSMUSG00000019831	Wasf1	WAS protein family, member 1 [Source:MGI Symbol;Acc:MGI:1890563]	120.494	9.14105	71.831	38.0778	-1.07737	0.061208
ENSMUSG00000050321	Neto1	neuropilin (NRP) and tolloid (TLL)-like 1 [Source:MGI Symbol;Acc:MGI:2180216]	21.2636	0.632088	16.51	8.7882	-1.07453	0.121494
ENSMUSG00000036882	Arhgap33	Rho GTPase activating protein 33 [Source:MGI Symbol;Acc:MGI:2673998]	118.31	3.88996	65.7066	34.8922	-1.07359	0.0704592
ENSMUSG00000009418	Nav1	neuron navigator 1 [Source:MGI Symbol;Acc:MGI:2183683]	35.2308	1.6858	40.2437	21.242	-1.0678	0.235441
ENSMUSG00000014592	Camta1	calmodulin binding transcription activator 1 [Source:MGI Symbol;Acc:MGI:2140230]	37.601	2.46385	26.6994	14.3183	-1.06554	0.0604689
ENSMUSG00000036377	C530008M17Rik	RIKEN cDNA C530008M17 gene [Source:MGI Symbol;Acc:MGI:2444817]	52.7785	2.40555	48.3334	26.0681	-1.05611	0.0558696
ENSMUSG00000026890	Lhx6	LIM homeobox protein 6 [Source:MGI Symbol;Acc:MGI:1306803]	32.7047	0.121743	13.4158	7.41735	-1.02494	0.0810515
ENSMUSG00000035566	Pcdh17	protocadherin 17 [Source:MGI Symbol;Acc:MGI:2684924]	12.2278	0.864327	17.5772	9.63468	-1.02395	0.11935
ENSMUSG00000055430	Nap1l5	nucleosome assembly protein 1-like 5 [Source:MGI Symbol;Acc:MGI:1923555]	76.4858	5.45187	49.7469	27.6427	-1.01317	0.0836771
ENSMUSG00000031837	Necab2	N-terminal EF-hand calcium binding protein 2 [Source:MGI Symbol;Acc:MGI:2152211]	19.2083	0.878755	19.5085	10.9751	-1.00572	0.0823128
ENSMUSG00000042834	Nrep	neuronal regeneration related protein [Source:MGI Symbol;Acc:MGI:99444]	416.154	34.679	234.008	131.737	-1.0035	0.0587855
ENSMUSG00000003657	Calb2	calbindin 2 [Source:MGI Symbol;Acc:MGI:101914]	51.3156	4.88503	22.2521	12.6392	-0.991536	0.12987
ENSMUSG00000006575	Rundc3a	RUN domain containing 3A [Source:MGI Symbol;Acc:MGI:1858752]	141.421	12.5044	97.8341	55.9883	-0.98286	0.0811527
ENSMUSG00000041112	Elmo1	engulfment and cell motility 1 [Source:MGI Symbol;Acc:MGI:2153044]	30.3574	3.06658	24.3182	14.018	-0.958263	0.131582
ENSMUSG00000061411	Nol4l	nucleolar protein 4-like [Source:MGI Symbol;Acc:MGI:1918765]	25.1038	2.09679	19.3621	11.1086	-0.955797	0.197393
ENSMUSG00000066392	Nrxn3	neurexin III [Source:MGI Symbol;Acc:MGI:1096389]	17.6107	1.87547	22.168	12.8091	-0.952869	0.164672
ENSMUSG00000073678	Pgap1	post-GPI attachment to proteins 1 [Source:MGI Symbol;Acc:MGI:2443342]	15.7599	1.25224	13.0065	7.56033	-0.945761	0.114875
ENSMUSG00000041923	Nol4	nucleolar protein 4 [Source:MGI Symbol;Acc:MGI:2441684]	31.2928	2.11019	21.7594	12.7123	-0.943975	0.105606
ENSMUSG00000070000	Fcho1	FCH domain only 1 [Source:MGI Symbol;Acc:MGI:1921265]	43.6989	3.4383	19.8991	11.7783	-0.92793	0.091875
ENSMUSG00000049612	Omg	oligodendrocyte myelin glycoprotein [Source:MGI Symbol;Acc:MGI:106586]	27.0733	1.28894	21.2701	12.4094	-0.926319	0.344741
ENSMUSG00000030329	Pianp	PILR alpha associated neural protein [Source:MGI Symbol;Acc:MGI:2441908]	51.9438	2.95485	18.7727	11.1708	-0.904154	0.21904
ENSMUSG00000030268	Bcat1	branched chain aminotransferase 1, cytosolic [Source:MGI Symbol;Acc:MGI:104861]	16.542	1.63633	14.0025	8.43282	-0.902345	0.0981605
ENSMUSG00000062591	Tubb4a	tubulin, beta 4A class IVA [Source:MGI Symbol;Acc:MGI:107848]	234.948	9.41997	155.156	94.4627	-0.893916	0.128352
ENSMUSG00000039735	Fnbp1l	formin binding protein 1-like [Source:MGI Symbol;Acc:MGI:1925642]	99.7465	9.07451	60.2164	36.3436	-0.889854	0.158375
ENSMUSG00000043460	Elfn2	leucine rich repeat and fibronectin type III, extracellular 2 [Source:MGI Symbol;Acc:MGI:3608416]	15.2156	0.214718	14.7027	8.98171	-0.879127	0.105815
ENSMUSG00000004031	Brinp2	bone morphogenic protein/retinoic acid inducible neural-specific 2 [Source:MGI Symbol;Acc:MGI:2443333]	31.7785	2.15031	30.6587	18.8139	-0.876241	0.121175
ENSMUSG00000060882	Kcnd2	potassium voltage-gated channel, Shal-related family, member 2 [Source:MGI Symbol;Acc:MGI:102663]	18.3835	1.67815	15.2027	9.26411	-0.873739	0.216567
ENSMUSG00000063446	Plppr1	phospholipid phosphatase related 1 [Source:MGI Symbol;Acc:MGI:2445015]	15.9229	0.735916	17.363	10.8029	-0.84961	0.158619
ENSMUSG00000070880	Gad1	glutamate decarboxylase 1 [Source:MGI Symbol;Acc:MGI:95632]	181.752	7.70809	70.958	44.4647	-0.848778	0.153675
ENSMUSG00000042763	Maneal	mannosidase, endo-alpha-like [Source:MGI Symbol;Acc:MGI:2684896]	27.5682	2.16341	16.2018	10.1033	-0.841583	0.242714
ENSMUSG00000042750	Bex2	brain expressed X-linked 2 [Source:MGI Symbol;Acc:MGI:1338017]	289.627	13.4577	171.268	108.35	-0.840435	0.186269
ENSMUSG00000031934	Panx1	pannexin 1 [Source:MGI Symbol;Acc:MGI:1860055]	26.3186	1.23008	18.812	11.8818	-0.837447	0.13637
ENSMUSG00000003410	Elavl3	ELAV (embryonic lethal, abnormal vision, Drosophila)-like 3 (Hu antigen C) [Source:MGI Symbol;Acc:MGI:109157]	116.088	2.94217	99.9745	63.3326	-0.826854	0.138551
ENSMUSG00000056895	Hist3h2ba	histone cluster 3, H2ba [Source:MGI Symbol;Acc:MGI:1925553]	65.4459	3.0265	46.3566	29.9271	-0.808723	0.245554
ENSMUSG00000047945	Marcksl1	MARCKS-like 1 [Source:MGI Symbol;Acc:MGI:97143]	630.292	46.6546	494.517	320.841	-0.798756	0.160988
ENSMUSG00000021364	Elovl2	elongation of very long chain fatty acids (FEN1/Elo2, SUR4/Elo3, yeast)-like 2 [Source:MGI Symbol;Acc:MGI:1858960]	13.4361	1.15551	13.7522	8.92326	-0.787766	0.223833
ENSMUSG00000040265	Dnm3	dynamin 3 [Source:MGI Symbol;Acc:MGI:1341299]	27.407	2.33789	17.1962	11.2708	-0.767077	0.269315
ENSMUSG00000041351	Rap1gap	Rap1 GTPase-activating protein [Source:MGI Symbol;Acc:MGI:109338]	47.2097	3.28898	28.8414	19.3036	-0.754646	0.203245
ENSMUSG00000025427	Rnf165	ring finger protein 165 [Source:MGI Symbol;Acc:MGI:2444521]	19.843	0.763816	14.2323	9.43497	-0.740519	0.467043
ENSMUSG00000023473	Celsr3	cadherin, EGF LAG seven-pass G-type receptor 3 [Source:MGI Symbol;Acc:MGI:1858236]	19.9945	0.369318	13.6698	9.19574	-0.733195	0.26928
ENSMUSG00000000861	Bcl11a	B cell CLL/lymphoma 11A (zinc finger protein) [Source:MGI Symbol;Acc:MGI:106190]	34.5917	0.695351	21.6645	14.6922	-0.717638	0.389665
ENSMUSG00000026657	Frmd4a	FERM domain containing 4A [Source:MGI Symbol;Acc:MGI:1919850]	35.4519	3.66572	27.0966	18.7451	-0.695213	0.270702
ENSMUSG00000020723	Cacng4	calcium channel, voltage-dependent, gamma subunit 4 [Source:MGI Symbol;Acc:MGI:1859167]	72.453	7.51675	55.2478	38.1494	-0.690961	0.384737
ENSMUSG00000030307	Slc6a11	solute carrier family 6 (neurotransmitter transporter, GABA), member 11 [Source:MGI Symbol;Acc:MGI:95630]	31.9606	0.474878	61.5804	43.2146	-0.682366	0.235441
ENSMUSG00000064125	Prr36	proline rich 36 [Source:MGI Symbol;Acc:MGI:3605626]	27.0881	0.888907	14.8839	10.3144	-0.674368	0.578684
ENSMUSG00000049804	Armcx4	armadillo repeat containing, X-linked 4 [Source:MGI Symbol;Acc:MGI:2147887]	22.9175	2.37186	18.2067	13.1639	-0.638667	0.285207
ENSMUSG00000036036	Zfp57	zinc finger protein 57 [Source:MGI Symbol;Acc:MGI:99204]	56.3488	2.69198	30.8597	22.2617	-0.635737	0.352747
ENSMUSG00000097545	Mir124a-1hg	Mir124-1 host gene (non-protein coding) [Source:MGI Symbol;Acc:MGI:2442197]	55.2586	1.26824	21.8947	15.7901	-0.628755	0.486101
ENSMUSG00000042978	Sbk1	SH3-binding kinase 1 [Source:MGI Symbol;Acc:MGI:2135937]	119.243	12.4254	91.3055	67.3562	-0.609071	0.316441
ENSMUSG00000023017	Asic1	acid-sensing (proton-gated) ion channel 1 [Source:MGI Symbol;Acc:MGI:1194915]	27.6105	1.70612	24.7579	18.5009	-0.589584	0.357726
ENSMUSG00000037989	Wnk2	WNK lysine deficient protein kinase 2 [Source:MGI Symbol;Acc:MGI:1922857]	22.3928	1.87618	23.4381	17.3658	-0.588345	0.489949
ENSMUSG00000048251	Bcl11b	B cell leukemia/lymphoma 11B [Source:MGI Symbol;Acc:MGI:1929913]	15.4184	0.160414	21.9645	16.5565	-0.570498	0.47025
ENSMUSG00000048385	Scrt1	scratch family zinc finger 1 [Source:MGI Symbol;Acc:MGI:2176606]	21.5187	0.37124	15.442	12.0703	-0.515019	0.529166
ENSMUSG00000067786	Nnat	neuronatin [Source:MGI Symbol;Acc:MGI:104716]	1397.36	109.083	669.663	537.293	-0.492777	0.495587
ENSMUSG00000031285	Dcx	doublecortin [Source:MGI Symbol;Acc:MGI:1277171]	110.346	2.11027	72.3103	57.6985	-0.478146	0.684737
ENSMUSG00000024935	Slc1a1	solute carrier family 1 (neuronal/epithelial high affinity glutamate transporter, system Xag), member 1 [Source:MGI Symbol;Acc:MGI:105083]	36.8959	1.41108	16.1161	13.088	-0.469613	0.516303
ENSMUSG00000025478	Dpysl4	dihydropyrimidinase-like 4 [Source:MGI Symbol;Acc:MGI:1349764]	39.9897	3.91391	22.787	19.8005	-0.379755	0.676321
ENSMUSG00000057706	Mex3b	mex3 RNA binding family member B [Source:MGI Symbol;Acc:MGI:1918252]	15.1979	1.4116	17.2609	15.6408	-0.313191	0.735128
ENSMUSG00000016386	Mpped2	metallophosphoesterase domain containing 2 [Source:MGI Symbol;Acc:MGI:1924265]	32.0129	1.63324	24.0741	22.1954	-0.28548	0.773759
ENSMUSG00000028654	Mycl	v-myc avian myelocytomatosis viral oncogene lung carcinoma derived [Source:MGI Symbol;Acc:MGI:96799]	31.2599	1.28755	13.8473	12.9198	-0.276474	0.798058
ENSMUSG00000032087	Dscaml1	DS cell adhesion molecule like 1 [Source:MGI Symbol;Acc:MGI:2150309]	12.8637	0.689921	11.8773	11.3994	-0.21774	0.871869
ENSMUSG00000030638	Sh3gl3	SH3-domain GRB2-like 3 [Source:MGI Symbol;Acc:MGI:700011]	27.2342	1.3588	19.0624	19.6755	-0.134969	0.930542
ENSMUSG00000004633	Chn2	chimerin 2 [Source:MGI Symbol;Acc:MGI:1917243]	24.7398	1.62326	9.50242	12.8381	0.267773	0.797183
ENSMUSG00000037754	Ppp1r16b	protein phosphatase 1, regulatory (inhibitor) subunit 16B [Source:MGI Symbol;Acc:MGI:2151841]	10.095	0.374341	11.8217	16.9398	0.344932	0.715368
ENSMUSG00000017493	Igfbp4	insulin-like growth factor binding protein 4 [Source:MGI Symbol;Acc:MGI:96439]	17.2981	1.36288	9.16554	15.2363	0.550588	0.533834
ENSMUSG00000061808	Ttr	transthyretin [Source:MGI Symbol;Acc:MGI:98865]	79.3735	1.76391	70.6273	139.453	0.809574	0.281902

## Sheet: Figure 4b
astrocyte-specific gene	astrocyte-specific gene_name	description	expression level in pure neuronal cultures (fpkm)	expression level in pure astrocyte cultures (fpkm)	Control average FPKM from Ding et al.	KCl average FPKM from Ding et al.	KCl vs. Con Log2-fold change	DESeq2 adjusted p-value (Con vs KCl)
ENSMUSG00000041548	Hspb8	heat shock protein 8 [Source:MGI Symbol;Acc:MGI:2135756]	0.302958	440.959	10.3228	70.6422	2.60024	1.71656e-06
ENSMUSG00000071637	Cebpd	CCAAT/enhancer binding protein (C/EBP), delta [Source:MGI Symbol;Acc:MGI:103573]	0.0587941	29.626	3.43411	21.45	2.47087	9.25834e-06
ENSMUSG00000067818	Myl9	myosin, light polypeptide 9, regulatory [Source:MGI Symbol;Acc:MGI:2138915]	0.588938	171.662	19.654	106.143	2.27086	9.25834e-06
ENSMUSG00000023905	Tnfrsf12a	tumor necrosis factor receptor superfamily, member 12a [Source:MGI Symbol;Acc:MGI:1351484]	1.6496	77.4078	6.50634	34.692	2.23942	0.000312753
ENSMUSG00000001025	S100a6	S100 calcium binding protein A6 (calcyclin) [Source:MGI Symbol;Acc:MGI:1339467]	0.507516	294.441	8.19648	41.7773	2.1722	0.000668731
ENSMUSG00000005087	Cd44	CD44 antigen [Source:MGI Symbol;Acc:MGI:88338]	0.257586	42.6134	3.96849	18.5794	2.0678	7.91129e-05
ENSMUSG00000004665	Cnn2	calponin 2 [Source:MGI Symbol;Acc:MGI:105093]	3.69479	104.874	13.1217	61.8282	2.06732	2.89004e-05
ENSMUSG00000035783	Acta2	actin, alpha 2, smooth muscle, aorta [Source:MGI Symbol;Acc:MGI:87909]	0.758199	323.708	86.4652	404.668	2.06515	4.61521e-05
ENSMUSG00000015647	Lama5	laminin, alpha 5 [Source:MGI Symbol;Acc:MGI:105382]	0.263517	26.4347	4.45681	20.2481	2.03164	0.00063935
ENSMUSG00000019997	Ctgf	connective tissue growth factor [Source:MGI Symbol;Acc:MGI:95537]	1.93484	609.122	6.43721	29.3168	2.02361	4.80373e-05
ENSMUSG00000031765	Mt1	metallothionein 1 [Source:MGI Symbol;Acc:MGI:97171]	16.7952	645.565	272.262	1229.22	2.01999	0.000399225
ENSMUSG00000028763	Hspg2	perlecan (heparan sulfate proteoglycan 2) [Source:MGI Symbol;Acc:MGI:96257]	0.146517	10.4842	5.69125	25.1158	2.00006	0.0111292
ENSMUSG00000026822	Lcn2	lipocalin 2 [Source:MGI Symbol;Acc:MGI:96757]	0.307295	100.098	7.49275	33.3505	1.99454	0.000225874
ENSMUSG00000068196	Col8a1	collagen, type VIII, alpha 1 [Source:MGI Symbol;Acc:MGI:88463]	0.541569	48.7583	7.74635	34.3392	1.98687	7.74929e-05
ENSMUSG00000028927	Padi2	peptidyl arginine deiminase, type II [Source:MGI Symbol;Acc:MGI:1338892]	0.118066	22.2909	3.96309	17.4077	1.97489	0.000524047
ENSMUSG00000029484	Anxa3	annexin A3 [Source:MGI Symbol;Acc:MGI:1201378]	1.28761	304.805	6.84142	29.5824	1.93732	0.000173741
ENSMUSG00000069833	Ahnak	AHNAK nucleoprotein (desmoyokin) [Source:MGI Symbol;Acc:MGI:1316648]	0.0338545	35.8153	7.01062	29.2814	1.89776	7.68084e-05
ENSMUSG00000028195	Cyr61	cysteine rich protein 61 [Source:MGI Symbol;Acc:MGI:88613]	1.19056	272.605	25.388	103.387	1.8651	0.00020522
ENSMUSG00000026193	Fn1	fibronectin 1 [Source:MGI Symbol;Acc:MGI:95566]	3.52395	58.343	11.4937	45.7417	1.84883	0.0152231
ENSMUSG00000020932	Gfap	glial fibrillary acidic protein [Source:MGI Symbol;Acc:MGI:95697]	0.382403	883.847	109.699	444.561	1.84726	0.000769123
ENSMUSG00000068220	Lgals1	lectin, galactose binding, soluble 1 [Source:MGI Symbol;Acc:MGI:96777]	7.94216	566.421	36.0351	145.332	1.83102	0.00243485
ENSMUSG00000015090	Ptgds	prostaglandin D2 synthase (brain) [Source:MGI Symbol;Acc:MGI:99261]	1.11333	58.6076	6.54608	26.4229	1.83095	0.0066722
ENSMUSG00000025351	Cd63	CD63 antigen [Source:MGI Symbol;Acc:MGI:99529]	5.09147	259.432	43.5162	173.213	1.80781	0.0125271
ENSMUSG00000024816	Frmd8	FERM domain containing 8 [Source:MGI Symbol;Acc:MGI:1914707]	1.0879	22.8105	5.40661	21.3738	1.8048	0.00173209
ENSMUSG00000067586	S1pr3	sphingosine-1-phosphate receptor 3 [Source:MGI Symbol;Acc:MGI:1339365]	0.979809	148.632	24.6265	95.2321	1.78388	0.000282299
ENSMUSG00000037552	Plekhg2	pleckstrin homology domain containing, family G (with RhoGef domain) member 2 [Source:MGI Symbol;Acc:MGI:2141874]	1.3338	35.5662	5.96927	22.6981	1.77345	0.00248675
ENSMUSG00000026728	Vim	vimentin [Source:MGI Symbol;Acc:MGI:98932]	6.22503	3082.38	243.238	934.017	1.77296	0.000177561
ENSMUSG00000029622	Arpc1b	actin related protein 2/3 complex, subunit 1B [Source:MGI Symbol;Acc:MGI:1343142]	0.310829	24.1495	4.90395	18.8223	1.75898	0.00481538
ENSMUSG00000041736	Tspo	translocator protein [Source:MGI Symbol;Acc:MGI:88222]	0.46443	33.0808	5.30484	20.2322	1.74448	0.0230583
ENSMUSG00000024048	Myl12a	myosin, light chain 12A, regulatory, non-sarcomeric [Source:MGI Symbol;Acc:MGI:1914518]	5.77021	136.503	20.067	74.7045	1.73011	0.000373697
ENSMUSG00000036570	Fxyd1	FXYD domain-containing ion transport regulator 1 [Source:MGI Symbol;Acc:MGI:1889273]	0.78392	54.576	16.2614	61.006	1.72733	0.0112875
ENSMUSG00000058056	Palld	palladin, cytoskeletal associated protein [Source:MGI Symbol;Acc:MGI:1919583]	0.705324	78.2264	11.9314	43.7706	1.71954	0.0018189
ENSMUSG00000014599	Csf1	colony stimulating factor 1 (macrophage) [Source:MGI Symbol;Acc:MGI:1339753]	0.421008	108.242	19.233	70.6765	1.71701	0.000603262
ENSMUSG00000022090	Pdlim2	PDZ and LIM domain 2 [Source:MGI Symbol;Acc:MGI:2384850]	0.0814083	48.7451	5.0172	18.5918	1.71278	0.00391343
ENSMUSG00000042436	Mfap4	microfibrillar-associated protein 4 [Source:MGI Symbol;Acc:MGI:1342276]	0.189395	14.7364	6.30029	23.0708	1.70856	0.000788841
ENSMUSG00000022091	Sorbs3	sorbin and SH3 domain containing 3 [Source:MGI Symbol;Acc:MGI:700013]	0.290037	125.639	10.9225	39.6199	1.70155	0.00160104
ENSMUSG00000035403	Crb2	crumbs family member 2 [Source:MGI Symbol;Acc:MGI:2679260]	0.149881	30.9833	6.5365	23.8896	1.69658	0.00159562
ENSMUSG00000027656	Wisp2	WNT1 inducible signaling pathway protein 2 [Source:MGI Symbol;Acc:MGI:1328326]	0.0952743	197.822	5.495	20.1353	1.6925	0.00468237
ENSMUSG00000021411	Pxdc1	PX domain containing 1 [Source:MGI Symbol;Acc:MGI:1914145]	0.442543	61.6629	4.74863	17.3146	1.68789	0.00352095
ENSMUSG00000038387	Rras	related RAS viral (r-ras) oncogene [Source:MGI Symbol;Acc:MGI:98179]	1.17218	91.3496	12.7227	46.2917	1.68497	0.00533225
ENSMUSG00000025492	Ifitm3	interferon induced transmembrane protein 3 [Source:MGI Symbol;Acc:MGI:1913391]	0.466707	306.257	15.9501	57.4785	1.67861	0.0033391
ENSMUSG00000031207	Msn	moesin [Source:MGI Symbol;Acc:MGI:97167]	0.582802	169.604	20.9995	74.9337	1.6756	0.000962271
ENSMUSG00000023249	Parp3	poly (ADP-ribose) polymerase family, member 3 [Source:MGI Symbol;Acc:MGI:1891258]	0.244689	41.1904	4.88946	17.4935	1.6697	0.00104497
ENSMUSG00000004044	Cavin1	caveolae associated 1 [Source:MGI Symbol;Acc:MGI:1277968]	0.678997	98.583	15.5311	55.6248	1.66662	0.000698025
ENSMUSG00000031375	Bgn	biglycan [Source:MGI Symbol;Acc:MGI:88158]	1.11682	26.2795	12.0844	42.4872	1.6641	0.0168515
ENSMUSG00000037031	Tspan15	tetraspanin 15 [Source:MGI Symbol;Acc:MGI:1917673]	0.704885	54.1279	13.3379	47.4104	1.64931	0.00843851
ENSMUSG00000037306	Man1c1	mannosidase, alpha, class 1C, member 1 [Source:MGI Symbol;Acc:MGI:2446214]	2.26893	57.7855	11.5372	40.7005	1.64882	0.00228001
ENSMUSG00000027907	S100a11	S100 calcium binding protein A11 [Source:MGI Symbol;Acc:MGI:1338798]	2.13743	353.751	62.2825	217.605	1.64513	0.00180293
ENSMUSG00000040152	Thbs1	thrombospondin 1 [Source:MGI Symbol;Acc:MGI:98737]	2.61043	280.238	29.696	103.351	1.64016	0.00159574
ENSMUSG00000028583	Pdpn	podoplanin [Source:MGI Symbol;Acc:MGI:103098]	0.373757	183.612	46.764	163.231	1.63956	0.000560782
ENSMUSG00000017009	Sdc4	syndecan 4 [Source:MGI Symbol;Acc:MGI:1349164]	0.186297	96.687	22.3227	78.073	1.63648	0.00129902
ENSMUSG00000022025	Cnmd	chondromodulin [Source:MGI Symbol;Acc:MGI:1341171]	0.0674631	86.9303	10.7769	37.7725	1.62995	0.0118179
ENSMUSG00000024164	C3	complement component 3 [Source:MGI Symbol;Acc:MGI:88227]	0.114655	215.842	14.817	51.4142	1.62892	0.000540785
ENSMUSG00000030342	Cd9	CD9 antigen [Source:MGI Symbol;Acc:MGI:88348]	2.86824	248.588	36.873	128.028	1.62618	0.000874473
ENSMUSG00000005413	Hmox1	heme oxygenase 1 [Source:MGI Symbol;Acc:MGI:96163]	2.34948	182.129	29.2068	100.58	1.62322	0.00122309
ENSMUSG00000009772	Nuak2	NUAK family, SNF1-like kinase, 2 [Source:MGI Symbol;Acc:MGI:1921387]	1.5668	78.9975	5.53144	19.1874	1.62227	0.00188481
ENSMUSG00000026701	Prdx6	peroxiredoxin 6 [Source:MGI Symbol;Acc:MGI:894320]	14.8326	1379.24	137.072	474.782	1.61789	0.00186971
ENSMUSG00000035873	Pawr	PRKC, apoptosis, WT1, regulator [Source:MGI Symbol;Acc:MGI:2149961]	0.353845	70.4007	9.96064	34.5433	1.61662	0.00387542
ENSMUSG00000075254	Heg1	heart development protein with EGF-like domains 1 [Source:MGI Symbol;Acc:MGI:1924696]	1.03208	125.508	17.4225	59.6936	1.61607	0.00115903
ENSMUSG00000016024	Lbp	lipopolysaccharide binding protein [Source:MGI Symbol;Acc:MGI:1098776]	0.444364	27.3419	5.97676	20.5702	1.61128	0.000962271
ENSMUSG00000022178	Ajuba	ajuba LIM protein [Source:MGI Symbol;Acc:MGI:1341886]	0.120262	34.3098	4.96608	17.119	1.60812	0.00686371
ENSMUSG00000007872	Id3	inhibitor of DNA binding 3 [Source:MGI Symbol;Acc:MGI:96398]	0.482391	192.696	34.3387	117.682	1.5983	0.00577206
ENSMUSG00000032231	Anxa2	annexin A2 [Source:MGI Symbol;Acc:MGI:88246]	0.866012	259.693	19.4524	66.0511	1.59242	0.000863474
ENSMUSG00000045532	C1ql1	complement component 1, q subcomponent-like 1 [Source:MGI Symbol;Acc:MGI:1344400]	0.228151	90.2214	8.70257	29.4896	1.58746	0.0100033
ENSMUSG00000032902	Slc16a1	solute carrier family 16 (monocarboxylic acid transporters), member 1 [Source:MGI Symbol;Acc:MGI:106013]	5.83681	64.4073	14.4343	48.7333	1.58057	0.00350834
ENSMUSG00000007041	Clic1	chloride intracellular channel 1 [Source:MGI Symbol;Acc:MGI:2148924]	0.927382	178.708	16.5372	55.8439	1.58024	0.00237173
ENSMUSG00000029381	Shroom3	shroom family member 3 [Source:MGI Symbol;Acc:MGI:1351655]	0.449058	58.2795	8.67339	28.998	1.58002	0.0017022
ENSMUSG00000003534	Ddr1	discoidin domain receptor family, member 1 [Source:MGI Symbol;Acc:MGI:99216]	13.2735	255.998	41.792	140.777	1.57543	0.00574171
ENSMUSG00000006782	Cnp	2',3'-cyclic nucleotide 3' phosphodiesterase [Source:MGI Symbol;Acc:MGI:88437]	4.01641	48.6845	21.1936	71.5291	1.57254	0.0154492
ENSMUSG00000021390	Ogn	osteoglycin [Source:MGI Symbol;Acc:MGI:109278]	0.242664	144.78	7.55467	24.8982	1.5715	0.0265974
ENSMUSG00000027452	Acss1	acyl-CoA synthetase short-chain family member 1 [Source:MGI Symbol;Acc:MGI:1915988]	1.40184	35.1877	14.8505	49.4306	1.56244	0.00501226
ENSMUSG00000041559	Fmod	fibromodulin [Source:MGI Symbol;Acc:MGI:1328364]	0.356305	306.572	5.9709	19.7092	1.55913	0.00169298
ENSMUSG00000030208	Emp1	epithelial membrane protein 1 [Source:MGI Symbol;Acc:MGI:107941]	0.632782	24.9128	7.2865	23.9474	1.55051	0.00138093
ENSMUSG00000034227	Foxj1	forkhead box J1 [Source:MGI Symbol;Acc:MGI:1347474]	1.4452	171.101	26.1528	86.5974	1.54957	0.0075441
ENSMUSG00000026547	Tagln2	transgelin 2 [Source:MGI Symbol;Acc:MGI:1312985]	1.38918	45.133	10.6666	34.7462	1.54441	0.00510204
ENSMUSG00000021091	Serpina3n	serine (or cysteine) peptidase inhibitor, clade A, member 3N [Source:MGI Symbol;Acc:MGI:105045]	5.21107	172.083	14.3277	46.326	1.53041	0.00214695
ENSMUSG00000001473	Tubb6	tubulin, beta 6 class V [Source:MGI Symbol;Acc:MGI:1915201]	0.357375	31.2687	8.68243	28.2816	1.52752	0.00441827
ENSMUSG00000026042	Col5a2	collagen, type V, alpha 2 [Source:MGI Symbol;Acc:MGI:88458]	2.4719	88.7389	7.05419	22.7939	1.52583	0.00115903
ENSMUSG00000023348	Trip6	thyroid hormone receptor interactor 6 [Source:MGI Symbol;Acc:MGI:1343458]	2.14131	42.2873	6.27793	20.2876	1.51394	0.017681
ENSMUSG00000019539	Rcn3	reticulocalbin 3, EF-hand calcium binding domain [Source:MGI Symbol;Acc:MGI:1277122]	1.16371	30.2237	7.9588	25.6336	1.51211	0.00589853
ENSMUSG00000021453	Gadd45g	growth arrest and DNA-damage-inducible 45 gamma [Source:MGI Symbol;Acc:MGI:1346325]	5.78092	128.823	17.0099	54.5916	1.50231	0.0194114
ENSMUSG00000026880	Stom	stomatin [Source:MGI Symbol;Acc:MGI:95403]	0.627726	64.8103	14.1886	44.8618	1.49791	0.00337097
ENSMUSG00000055799	Tcf7l1	transcription factor 7 like 1 (T cell specific, HMG box) [Source:MGI Symbol;Acc:MGI:1202876]	0.0601861	33.3135	6.32466	19.7865	1.4933	0.0187984
ENSMUSG00000053931	Cnn3	calponin 3, acidic [Source:MGI Symbol;Acc:MGI:1919244]	14.86	1076.89	136.533	431.237	1.4901	0.00141027
ENSMUSG00000029761	Cald1	caldesmon 1 [Source:MGI Symbol;Acc:MGI:88250]	2.93375	122.992	18.8045	58.8505	1.48568	0.00361391
ENSMUSG00000030541	Idh2	isocitrate dehydrogenase 2 (NADP+), mitochondrial [Source:MGI Symbol;Acc:MGI:96414]	12.265	228.922	43.4599	137.254	1.48487	0.00445812
ENSMUSG00000046718	Bst2	bone marrow stromal cell antigen 2 [Source:MGI Symbol;Acc:MGI:1916800]	0.333219	73.2363	5.44663	17.344	1.48331	0.0669005
ENSMUSG00000032060	Cryab	crystallin, alpha B [Source:MGI Symbol;Acc:MGI:88516]	3.56932	301.191	19.1742	60.3664	1.48186	0.00327071
ENSMUSG00000029070	Mxra8	matrix-remodelling associated 8 [Source:MGI Symbol;Acc:MGI:1922011]	0.659884	121.741	8.20485	25.7539	1.48147	0.00260449
ENSMUSG00000051811	Cox6b2	cytochrome c oxidase subunit VIb polypeptide 2 [Source:MGI Symbol;Acc:MGI:3044182]	3.78763	74.5048	12.8778	40.8644	1.47966	0.0504764
ENSMUSG00000023186	Vwa5a	von Willebrand factor A domain containing 5A [Source:MGI Symbol;Acc:MGI:1915026]	1.07632	45.2367	5.80887	18.1744	1.47709	0.00213256
ENSMUSG00000004891	Nes	nestin [Source:MGI Symbol;Acc:MGI:101784]	0.426739	143.096	47.2774	145.349	1.44867	0.0034275
ENSMUSG00000038855	Itpkb	inositol 1,4,5-trisphosphate 3-kinase B [Source:MGI Symbol;Acc:MGI:109235]	0.189014	20.3492	5.51582	16.9374	1.44759	0.00675407
ENSMUSG00000052911	Lamb2	laminin, beta 2 [Source:MGI Symbol;Acc:MGI:99916]	0.167742	92.7929	13.623	41.7526	1.4464	0.00361919
ENSMUSG00000030341	Tnfrsf1a	tumor necrosis factor receptor superfamily, member 1a [Source:MGI Symbol;Acc:MGI:1314884]	0.299218	73.7745	9.17764	28.1091	1.44401	0.0032681
ENSMUSG00000026003	Acadl	acyl-Coenzyme A dehydrogenase, long-chain [Source:MGI Symbol;Acc:MGI:87866]	1.42665	82.2172	22.3502	68.2088	1.4423	0.00315538
ENSMUSG00000044080	S100a1	S100 calcium binding protein A1 [Source:MGI Symbol;Acc:MGI:1338917]	0.405256	122.174	18.1278	55.532	1.44203	0.0109309
ENSMUSG00000041577	Prelp	proline arginine-rich end leucine-rich repeat [Source:MGI Symbol;Acc:MGI:2151110]	0.177454	92.2393	5.10802	15.5025	1.44098	0.00660409
ENSMUSG00000033855	Ston1	stonin 1 [Source:MGI Symbol;Acc:MGI:1924307]	0.144945	24.9928	6.1393	18.5857	1.43836	0.00759451
ENSMUSG00000035413	Tmem98	transmembrane protein 98 [Source:MGI Symbol;Acc:MGI:1923457]	0.276113	82.2457	10.8326	33.1539	1.43699	0.0115325
ENSMUSG00000085795	Zfp703	zinc finger protein 703 [Source:MGI Symbol;Acc:MGI:2662729]	3.66211	77.4443	13.0167	39.3753	1.43582	0.00694954
ENSMUSG00000022790	Igsf11	immunoglobulin superfamily, member 11 [Source:MGI Symbol;Acc:MGI:2388477]	2.11528	68.7691	24.1844	72.7573	1.4259	0.00480426
ENSMUSG00000032431	Crtap	cartilage associated protein [Source:MGI Symbol;Acc:MGI:1891221]	1.07656	20.2689	6.46879	19.5068	1.42432	0.00587833
ENSMUSG00000031596	Slc7a2	solute carrier family 7 (cationic amino acid transporter, y+ system), member 2 [Source:MGI Symbol;Acc:MGI:99828]	0.265633	28.7289	5.35258	16.0626	1.42064	0.00415643
ENSMUSG00000042745	Id1	inhibitor of DNA binding 1 [Source:MGI Symbol;Acc:MGI:96396]	0.353885	89.9952	14.5658	43.7865	1.41825	0.00954319
ENSMUSG00000011884	Gltp	glycolipid transfer protein [Source:MGI Symbol;Acc:MGI:1929253]	1.82388	31.4501	16.903	50.5017	1.41766	0.00615637
ENSMUSG00000070532	Ccdc190	coiled-coil domain containing 190 [Source:MGI Symbol;Acc:MGI:1925715]	0.138282	39.3911	8.70124	25.7634	1.39102	0.0179507
ENSMUSG00000026173	Plcd4	phospholipase C, delta 4 [Source:MGI Symbol;Acc:MGI:107469]	0.231261	47.1858	7.29362	21.45	1.39043	0.00437038
ENSMUSG00000032220	Myo1e	myosin IE [Source:MGI Symbol;Acc:MGI:106621]	0.605895	46.9258	5.90591	17.3138	1.3871	0.0063624
ENSMUSG00000031274	Col4a5	collagen, type IV, alpha 5 [Source:MGI Symbol;Acc:MGI:88456]	0.1166	37.4569	6.557	19.2186	1.38557	0.00453226
ENSMUSG00000031760	Mt3	metallothionein 3 [Source:MGI Symbol;Acc:MGI:97173]	46.0705	2323.06	909.337	2650.75	1.37459	0.0062012
ENSMUSG00000039004	Bmp6	bone morphogenetic protein 6 [Source:MGI Symbol;Acc:MGI:88182]	0.209421	83.1328	18.1824	53.2845	1.37385	0.0124521
ENSMUSG00000039043	Arpin	actin-related protein 2/3 complex inhibitor [Source:MGI Symbol;Acc:MGI:1917670]	1.91526	30.4204	7.02782	20.5097	1.37226	0.0119989
ENSMUSG00000022562	Oplah	5-oxoprolinase (ATP-hydrolysing) [Source:MGI Symbol;Acc:MGI:1922725]	1.58723	37.044	6.09755	17.8556	1.37123	0.0309041
ENSMUSG00000024940	Ltbp3	latent transforming growth factor beta binding protein 3 [Source:MGI Symbol;Acc:MGI:1101355]	1.00816	74.9311	8.19529	23.7754	1.3696	0.0082859
ENSMUSG00000032737	Inppl1	inositol polyphosphate phosphatase-like 1 [Source:MGI Symbol;Acc:MGI:1333787]	1.47791	47.96	9.91873	28.755	1.36682	0.00922361
ENSMUSG00000018593	Sparc	secreted acidic cysteine rich glycoprotein [Source:MGI Symbol;Acc:MGI:98373]	8.1687	2988.56	233.303	675.968	1.36515	0.0034275
ENSMUSG00000020427	Igfbp3	insulin-like growth factor binding protein 3 [Source:MGI Symbol;Acc:MGI:96438]	13.9003	485.41	39.0956	112.24	1.35745	0.00488374
ENSMUSG00000022491	Glycam1	glycosylation dependent cell adhesion molecule 1 [Source:MGI Symbol;Acc:MGI:95759]	0.104725	376.461	7.89812	22.3884	1.35131	0.0639659
ENSMUSG00000002233	Rhoc	ras homolog family member C [Source:MGI Symbol;Acc:MGI:106028]	0.943301	104.634	22.4931	64.7355	1.35011	0.0134617
ENSMUSG00000041734	Kirrel	kin of IRRE like (Drosophila) [Source:MGI Symbol;Acc:MGI:1891396]	1.27606	21.9119	5.4279	15.425	1.34773	0.0123171
ENSMUSG00000024079	Eif2ak2	eukaryotic translation initiation factor 2-alpha kinase 2 [Source:MGI Symbol;Acc:MGI:1353449]	0.205835	19.9045	5.7961	16.4693	1.34343	0.00874718
ENSMUSG00000024132	Eci1	enoyl-Coenzyme A delta isomerase 1 [Source:MGI Symbol;Acc:MGI:94871]	0.671399	30.2448	7.76181	22.253	1.34064	0.0549547
ENSMUSG00000024909	Efemp2	epidermal growth factor-containing fibulin-like extracellular matrix protein 2 [Source:MGI Symbol;Acc:MGI:1891209]	4.40883	94.5289	15.791	44.9945	1.33759	0.00694954
ENSMUSG00000025083	Afap1l2	actin filament associated protein 1-like 2 [Source:MGI Symbol;Acc:MGI:2147658]	0.100384	48.743	10.2678	29.0124	1.33565	0.00796414
ENSMUSG00000027712	Anxa5	annexin A5 [Source:MGI Symbol;Acc:MGI:106008]	5.09746	337.212	45.5454	129.819	1.33531	0.0171567
ENSMUSG00000042613	Pbxip1	pre B cell leukemia transcription factor interacting protein 1 [Source:MGI Symbol;Acc:MGI:2441670]	0.666909	207.137	40.0892	113.845	1.33064	0.0163167
ENSMUSG00000029723	Tsc22d4	TSC22 domain family, member 4 [Source:MGI Symbol;Acc:MGI:1926079]	4.20494	62.6528	17.6833	49.9964	1.32834	0.0110183
ENSMUSG00000020422	Tns3	tensin 3 [Source:MGI Symbol;Acc:MGI:2443012]	0.878649	86.7907	19.8417	55.9768	1.32448	0.00935083
ENSMUSG00000064215	Ifi27	interferon, alpha-inducible protein 27 [Source:MGI Symbol;Acc:MGI:1277180]	5.9266	248.02	8.65429	24.6261	1.32079	0.12331
ENSMUSG00000028465	Tln1	talin 1 [Source:MGI Symbol;Acc:MGI:1099832]	3.77764	53.4414	12.013	33.6287	1.3202	0.00601634
ENSMUSG00000042312	S100a13	S100 calcium binding protein A13 [Source:MGI Symbol;Acc:MGI:109581]	0.20891	66.2807	7.14245	20.1158	1.31731	0.0623599
ENSMUSG00000037815	Ctnna1	catenin (cadherin associated protein), alpha 1 [Source:MGI Symbol;Acc:MGI:88274]	3.71368	192.244	36.6028	102.181	1.31581	0.00779039
ENSMUSG00000024538	Ppic	peptidylprolyl isomerase C [Source:MGI Symbol;Acc:MGI:97751]	0.297951	11.3843	9.08894	25.3148	1.31186	0.0115325
ENSMUSG00000024176	Sox8	SRY (sex determining region Y)-box 8 [Source:MGI Symbol;Acc:MGI:98370]	1.45677	17.8919	16.5388	45.8643	1.30551	0.0094715
ENSMUSG00000051048	P4ha3	procollagen-proline, 2-oxoglutarate 4-dioxygenase (proline 4-hydroxylase), alpha polypeptide III [Source:MGI Symbol;Acc:MGI:2444049]	0.319258	35.7078	13.6383	37.945	1.30454	0.0140663
ENSMUSG00000028868	Wasf2	WAS protein family, member 2 [Source:MGI Symbol;Acc:MGI:1098641]	1.51866	19.7833	6.59296	18.1667	1.30314	0.0164524
ENSMUSG00000076441	Ass1	argininosuccinate synthetase 1 [Source:MGI Symbol;Acc:MGI:88090]	2.97076	40.7303	6.80915	18.9092	1.30255	0.0137872
ENSMUSG00000038816	Ctnnal1	catenin (cadherin associated protein), alpha-like 1 [Source:MGI Symbol;Acc:MGI:1859649]	3.55356	147.009	9.53778	26.3471	1.29713	0.00977499
ENSMUSG00000041556	Fbxo2	F-box protein 2 [Source:MGI Symbol;Acc:MGI:2446216]	3.47235	194.299	39.1722	109.893	1.29638	0.153675
ENSMUSG00000021127	Zfp36l1	zinc finger protein 36, C3H type-like 1 [Source:MGI Symbol;Acc:MGI:107946]	0.16027	64.0748	13.009	35.6481	1.29509	0.0181234
ENSMUSG00000028273	Pdlim5	PDZ and LIM domain 5 [Source:MGI Symbol;Acc:MGI:1927489]	1.548	66.6888	16.8094	46.1723	1.28796	0.00954272
ENSMUSG00000022665	Ccdc80	coiled-coil domain containing 80 [Source:MGI Symbol;Acc:MGI:1915146]	0.498893	95.6252	8.13864	22.3315	1.28615	0.0102379
ENSMUSG00000024900	Cpt1a	carnitine palmitoyltransferase 1a, liver [Source:MGI Symbol;Acc:MGI:1098296]	0.523901	66.5705	16.6569	45.5302	1.28614	0.00822888
ENSMUSG00000028128	F3	coagulation factor III [Source:MGI Symbol;Acc:MGI:88381]	1.49258	96.0007	13.663	37.3747	1.28612	0.0120302
ENSMUSG00000039323	Igfbp2	insulin-like growth factor binding protein 2 [Source:MGI Symbol;Acc:MGI:96437]	18.0833	1022.85	180.035	495.375	1.28205	0.0160395
ENSMUSG00000026879	Gsn	gelsolin [Source:MGI Symbol;Acc:MGI:95851]	1.24406	136.13	18.5315	50.7891	1.27996	0.0129204
ENSMUSG00000040260	Daam2	dishevelled associated activator of morphogenesis 2 [Source:MGI Symbol;Acc:MGI:1923691]	0.404717	44.63	11.6925	31.7731	1.27948	0.0116468
ENSMUSG00000031714	Gab1	growth factor receptor bound protein 2-associated protein 1 [Source:MGI Symbol;Acc:MGI:108088]	2.6924	39.1669	9.93745	26.9317	1.27759	0.0151594
ENSMUSG00000020388	Pdlim4	PDZ and LIM domain 4 [Source:MGI Symbol;Acc:MGI:1353470]	1.77555	51.2798	14.652	40.1225	1.27726	0.025102
ENSMUSG00000040690	Col16a1	collagen, type XVI, alpha 1 [Source:MGI Symbol;Acc:MGI:1095396]	1.03093	12.8476	5.38334	14.6613	1.2738	0.0202163
ENSMUSG00000050953	Gja1	gap junction protein, alpha 1 [Source:MGI Symbol;Acc:MGI:95713]	0.574146	92.7417	77.289	209.875	1.27226	0.0121844
ENSMUSG00000063856	Gpx1	glutathione peroxidase 1 [Source:MGI Symbol;Acc:MGI:104887]	23.9306	269.629	35.8933	97.9626	1.271	0.0326852
ENSMUSG00000002602	Axl	AXL receptor tyrosine kinase [Source:MGI Symbol;Acc:MGI:1347244]	0.0767646	39.1013	13.3618	36.1505	1.27033	0.011359
ENSMUSG00000026433	Rab29	RAB29, member RAS oncogene family [Source:MGI Symbol;Acc:MGI:2385107]	2.34862	101.361	5.91231	16.1206	1.26798	0.0536026
ENSMUSG00000031799	Tpm4	tropomyosin 4 [Source:MGI Symbol;Acc:MGI:2449202]	10.0374	146.638	28.9958	78.2478	1.26739	0.00954272
ENSMUSG00000073802	Cdkn2b	cyclin-dependent kinase inhibitor 2B (p15, inhibits CDK4) [Source:MGI Symbol;Acc:MGI:104737]	0.135414	31.7432	6.08817	16.6443	1.26287	0.110057
ENSMUSG00000002274	Metrn	meteorin, glial cell differentiation regulator [Source:MGI Symbol;Acc:MGI:1917333]	0.956724	331.865	7.71677	21.1656	1.26084	0.245554
ENSMUSG00000028494	Plin2	perilipin 2 [Source:MGI Symbol;Acc:MGI:87920]	1.91872	47.0063	5.50914	14.9193	1.26084	0.0294406
ENSMUSG00000015243	Abca1	ATP-binding cassette, sub-family A (ABC1), member 1 [Source:MGI Symbol;Acc:MGI:99607]	0.483245	98.3616	29.8905	79.9917	1.2597	0.0165499
ENSMUSG00000060591	Ifitm2	interferon induced transmembrane protein 2 [Source:MGI Symbol;Acc:MGI:1933382]	1.26516	183.743	10.5086	28.3827	1.25942	0.0292829
ENSMUSG00000028480	Glipr2	GLI pathogenesis-related 2 [Source:MGI Symbol;Acc:MGI:1917770]	2.93452	52.4204	11.0126	29.6075	1.25816	0.0110632
ENSMUSG00000026421	Csrp1	cysteine and glycine-rich protein 1 [Source:MGI Symbol;Acc:MGI:88549]	1.30132	90.0201	29.3361	78.7382	1.25706	0.0101672
ENSMUSG00000027984	Hadh	hydroxyacyl-Coenzyme A dehydrogenase [Source:MGI Symbol;Acc:MGI:96009]	0.768367	21.9952	8.11001	21.7989	1.25396	0.0149103
ENSMUSG00000020821	Kif1c	kinesin family member 1C [Source:MGI Symbol;Acc:MGI:1098260]	2.99422	52.4959	20.0119	53.7571	1.25344	0.0170398
ENSMUSG00000001761	Smo	smoothened, frizzled class receptor [Source:MGI Symbol;Acc:MGI:108075]	0.836566	38.6761	17.3089	46.6758	1.25339	0.0370441
ENSMUSG00000037725	Ckap2	cytoskeleton associated protein 2 [Source:MGI Symbol;Acc:MGI:1931797]	0.543455	14.1678	6.71988	17.9031	1.25125	0.0197653
ENSMUSG00000029086	Prom1	prominin 1 [Source:MGI Symbol;Acc:MGI:1100886]	0.288306	20.5709	7.25501	19.4373	1.24997	0.0172412
ENSMUSG00000015839	Nfe2l2	nuclear factor, erythroid derived 2, like 2 [Source:MGI Symbol;Acc:MGI:108420]	0.358277	162.644	22.2903	58.8725	1.24472	0.038121
ENSMUSG00000025510	Cd151	CD151 antigen [Source:MGI Symbol;Acc:MGI:1096360]	7.22956	162.414	28.1382	75.515	1.24338	0.0592783
ENSMUSG00000006390	Elovl1	elongation of very long chain fatty acids (FEN1/Elo2, SUR4/Elo3, yeast)-like 1 [Source:MGI Symbol;Acc:MGI:1858959]	0.720108	23.8432	5.74755	15.2732	1.2424	0.0188427
ENSMUSG00000055320	Tead1	TEA domain family member 1 [Source:MGI Symbol;Acc:MGI:101876]	1.66394	26.866	8.74787	22.8648	1.24096	0.128962
ENSMUSG00000008090	Fgfrl1	fibroblast growth factor receptor-like 1 [Source:MGI Symbol;Acc:MGI:2150920]	0.254013	103.113	16.9418	45.0817	1.24078	0.015054
ENSMUSG00000022443	Myh9	myosin, heavy polypeptide 9, non-muscle [Source:MGI Symbol;Acc:MGI:107717]	4.9251	64.4583	21.8158	57.2162	1.22776	0.0130799
ENSMUSG00000028551	Cdkn2c	cyclin-dependent kinase inhibitor 2C (p18, inhibits CDK4) [Source:MGI Symbol;Acc:MGI:105388]	0.0957446	12.7241	6.10659	16.1741	1.22576	0.0509758
ENSMUSG00000020844	Nxn	nucleoredoxin [Source:MGI Symbol;Acc:MGI:109331]	3.51038	39.4704	14.8016	39.144	1.22328	0.0520513
ENSMUSG00000040605	Bace2	beta-site APP-cleaving enzyme 2 [Source:MGI Symbol;Acc:MGI:1860440]	1.19175	46.185	7.11938	18.7066	1.22316	0.0194114
ENSMUSG00000016256	Ctsz	cathepsin Z [Source:MGI Symbol;Acc:MGI:1891190]	2.86265	80.8056	14.461	38.0736	1.21884	0.0529131
ENSMUSG00000021112	Mpp5	membrane protein, palmitoylated 5 (MAGUK p55 subfamily member 5) [Source:MGI Symbol;Acc:MGI:1927339]	2.16088	42.5618	8.46447	22.0794	1.2183	0.0181357
ENSMUSG00000030739	Myh14	myosin, heavy polypeptide 14 [Source:MGI Symbol;Acc:MGI:1919210]	0.23752	20.6673	6.77428	17.7844	1.21803	0.0304191
ENSMUSG00000073418	C4b	complement component 4B (Chido blood group) [Source:MGI Symbol;Acc:MGI:88228]	0.067834	34.7248	8.34656	21.7785	1.21679	0.026035
ENSMUSG00000027878	Notch2	notch 2 [Source:MGI Symbol;Acc:MGI:97364]	0.89225	32.2538	9.25447	23.8556	1.21114	0.0471185
ENSMUSG00000039450	Dcxr	dicarbonyl L-xylulose reductase [Source:MGI Symbol;Acc:MGI:1915130]	0.941136	71.8352	8.68634	22.9036	1.20961	0.143841
ENSMUSG00000000567	Sox9	SRY (sex determining region Y)-box 9 [Source:MGI Symbol;Acc:MGI:98371]	0.718314	66.6937	37.7773	97.207	1.20807	0.0427635
ENSMUSG00000000753	Serpinf1	serine (or cysteine) peptidase inhibitor, clade F, member 1 [Source:MGI Symbol;Acc:MGI:108080]	0.938292	159.579	6.21085	16.0327	1.20754	0.0540665
ENSMUSG00000031119	Gpc4	glypican 4 [Source:MGI Symbol;Acc:MGI:104902]	7.05415	358.649	50.6207	130.693	1.20721	0.0201966
ENSMUSG00000024960	Plcb3	phospholipase C, beta 3 [Source:MGI Symbol;Acc:MGI:104778]	1.14783	35.7068	7.76893	20.1088	1.20443	0.0197189
ENSMUSG00000074457	S100a16	S100 calcium binding protein A16 [Source:MGI Symbol;Acc:MGI:1915110]	0.385447	186.594	45.7764	119.236	1.20182	0.048685
ENSMUSG00000038023	Atp6v0a2	ATPase, H+ transporting, lysosomal V0 subunit A2 [Source:MGI Symbol;Acc:MGI:104855]	6.27983	68.4759	11.5898	30.0077	1.20059	0.0284216
ENSMUSG00000023022	Lima1	LIM domain and actin binding 1 [Source:MGI Symbol;Acc:MGI:1920992]	0.737158	25.6362	10.1212	25.9394	1.19885	0.0309568
ENSMUSG00000002985	Apoe	apolipoprotein E [Source:MGI Symbol;Acc:MGI:88057]	14.0248	4770.01	1270.15	3301.48	1.1983	0.0729353
ENSMUSG00000022323	Rida	reactive intermediate imine deaminase A homolog [Source:MGI Symbol;Acc:MGI:1095401]	4.73982	49.9563	10.1177	26.2465	1.19796	0.0755899
ENSMUSG00000076435	Acsf2	acyl-CoA synthetase family member 2 [Source:MGI Symbol;Acc:MGI:2388287]	0.0524493	14.5761	13.5956	34.7683	1.19357	0.0268298
ENSMUSG00000021760	Gpx8	glutathione peroxidase 8 (putative) [Source:MGI Symbol;Acc:MGI:1916840]	1.10338	130.011	16.749	42.9348	1.18434	0.0323298
ENSMUSG00000042626	Shc1	src homology 2 domain-containing transforming protein C1 [Source:MGI Symbol;Acc:MGI:98296]	1.25361	19.9814	6.41689	16.3858	1.18129	0.0238864
ENSMUSG00000048376	F2r	coagulation factor II (thrombin) receptor [Source:MGI Symbol;Acc:MGI:101802]	4.34795	67.7021	21.5049	54.553	1.18112	0.0223559
ENSMUSG00000029119	Man2b2	mannosidase 2, alpha B2 [Source:MGI Symbol;Acc:MGI:1195262]	0.804028	37.0869	11.8719	30.2001	1.18091	0.017409
ENSMUSG00000030770	Parva	parvin, alpha [Source:MGI Symbol;Acc:MGI:1931144]	5.75197	61.8592	12.5339	31.8355	1.18089	0.017987
ENSMUSG00000029810	Tmem176b	transmembrane protein 176B [Source:MGI Symbol;Acc:MGI:1916348]	8.62924	223.83	22.75	58.3635	1.18079	0.0454675
ENSMUSG00000070436	Serpinh1	serine (or cysteine) peptidase inhibitor, clade H, member 1 [Source:MGI Symbol;Acc:MGI:88283]	0.891901	189.6	57.4788	147.273	1.17835	0.0387684
ENSMUSG00000027882	Stxbp3	syntaxin binding protein 3 [Source:MGI Symbol;Acc:MGI:107362]	1.90647	22.8495	7.11393	18.0506	1.17707	0.026879
ENSMUSG00000037060	Cavin3	caveolae associated 3 [Source:MGI Symbol;Acc:MGI:1923422]	0.774412	27.4555	5.87106	14.9497	1.1746	0.0399457
ENSMUSG00000008540	Mgst1	microsomal glutathione S-transferase 1 [Source:MGI Symbol;Acc:MGI:1913850]	0.632724	130.914	22.2695	56.5796	1.17153	0.0241939
ENSMUSG00000022469	Rapgef3	Rap guanine nucleotide exchange factor (GEF) 3 [Source:MGI Symbol;Acc:MGI:2441741]	1.99956	30.524	6.7363	17.0107	1.17046	0.0323298
ENSMUSG00000024486	Hbegf	heparin-binding EGF-like growth factor [Source:MGI Symbol;Acc:MGI:96070]	5.17747	71.9216	10.0943	25.6212	1.16992	0.0320195
ENSMUSG00000020037	Rfx4	regulatory factor X, 4 (influences HLA class II expression) [Source:MGI Symbol;Acc:MGI:1918387]	0.124683	27.5444	14.2068	35.5363	1.16827	0.0619498
ENSMUSG00000046240	Hepacam	hepatocyte cell adhesion molecule [Source:MGI Symbol;Acc:MGI:1920177]	0.271363	87.4474	36.8497	92.4648	1.16633	0.0266382
ENSMUSG00000030088	Aldh1l1	aldehyde dehydrogenase 1 family, member L1 [Source:MGI Symbol;Acc:MGI:1340024]	0.330979	53.1011	28.2557	71.5414	1.16623	0.0283268
ENSMUSG00000027962	Vcam1	vascular cell adhesion molecule 1 [Source:MGI Symbol;Acc:MGI:98926]	0.155925	31.947	22.0973	55.5624	1.16463	0.0171168
ENSMUSG00000017754	Pltp	phospholipid transfer protein [Source:MGI Symbol;Acc:MGI:103151]	2.13912	196.254	13.0977	32.9959	1.16071	0.0236022
ENSMUSG00000026176	Ctdsp1	CTD (carboxy-terminal domain, RNA polymerase II, polypeptide A) small phosphatase 1 [Source:MGI Symbol;Acc:MGI:2654470]	0.911911	60.9206	15.9412	40.0148	1.15761	0.0235996
ENSMUSG00000069516	Lyz2	lysozyme 2 [Source:MGI Symbol;Acc:MGI:96897]	2.01669	62.2129	9.54866	24.008	1.15734	0.0460843
ENSMUSG00000022037	Clu	clusterin [Source:MGI Symbol;Acc:MGI:88423]	21.4444	1841.12	230.612	576.062	1.15628	0.0182176
ENSMUSG00000053012	Krcc1	lysine-rich coiled-coil 1 [Source:MGI Symbol;Acc:MGI:1889377]	2.46536	44.4855	9.79802	24.4277	1.15366	0.0338882
ENSMUSG00000022816	Fstl1	follistatin-like 1 [Source:MGI Symbol;Acc:MGI:102793]	12.904	219.705	56.1909	140.299	1.1533	0.016532
ENSMUSG00000036949	Slc39a12	solute carrier family 39 (zinc transporter), member 12 [Source:MGI Symbol;Acc:MGI:2139274]	0.204834	91.2354	16.3137	40.7159	1.1512	0.0207854
ENSMUSG00000028223	Decr1	2,4-dienoyl CoA reductase 1, mitochondrial [Source:MGI Symbol;Acc:MGI:1914710]	0.214757	31.3808	6.87936	17.1856	1.14586	0.0470828
ENSMUSG00000022272	Myo10	myosin X [Source:MGI Symbol;Acc:MGI:107716]	0.460012	73.7654	19.5296	48.4241	1.14567	0.0262735
ENSMUSG00000072949	Acot1	acyl-CoA thioesterase 1 [Source:MGI Symbol;Acc:MGI:1349396]	0.904916	21.0468	14.1787	35.4975	1.14319	0.0810178
ENSMUSG00000027803	Wwtr1	WW domain containing transcription regulator 1 [Source:MGI Symbol;Acc:MGI:1917649]	0.241814	34.4675	13.2468	32.6716	1.13989	0.0277889
ENSMUSG00000034714	Ttyh2	tweety family member 2 [Source:MGI Symbol;Acc:MGI:2157091]	0.301221	17.7373	8.48362	20.9515	1.1395	0.0266741
ENSMUSG00000041895	Wipi1	WD repeat domain, phosphoinositide interacting 1 [Source:MGI Symbol;Acc:MGI:1261864]	1.97283	21.2817	13.4074	32.9811	1.13314	0.0242616
ENSMUSG00000030701	Plekhb1	pleckstrin homology domain containing, family B (evectins) member 1 [Source:MGI Symbol;Acc:MGI:1351469]	2.0397	121.945	12.276	30.3654	1.12933	0.0506105
ENSMUSG00000058325	Dock1	dedicator of cytokinesis 1 [Source:MGI Symbol;Acc:MGI:2429765]	0.157677	16.012	6.08629	14.8824	1.12876	0.0362881
ENSMUSG00000024827	Gldc	glycine decarboxylase [Source:MGI Symbol;Acc:MGI:1341155]	0.217956	65.9764	14.4577	35.5635	1.12781	0.0288569
ENSMUSG00000020044	Timp3	tissue inhibitor of metalloproteinase 3 [Source:MGI Symbol;Acc:MGI:98754]	3.01922	430.784	19.11	46.7466	1.12656	0.0258311
ENSMUSG00000073982	Rhog	ras homolog family member G [Source:MGI Symbol;Acc:MGI:1928370]	1.00392	42.7199	8.7976	21.4901	1.12498	0.0459715
ENSMUSG00000018217	Pmp22	peripheral myelin protein 22 [Source:MGI Symbol;Acc:MGI:97631]	0.573384	83.8451	20.4335	49.8788	1.12279	0.0308672
ENSMUSG00000052310	Slc39a1	solute carrier family 39 (zinc transporter), member 1 [Source:MGI Symbol;Acc:MGI:1353474]	8.92816	115.802	37.5035	92.1092	1.12253	0.0405753
ENSMUSG00000017765	Slc12a4	solute carrier family 12, member 4 [Source:MGI Symbol;Acc:MGI:1309465]	2.20834	65.5114	9.03454	22.2483	1.12056	0.0830075
ENSMUSG00000026185	Igfbp5	insulin-like growth factor binding protein 5 [Source:MGI Symbol;Acc:MGI:96440]	13.7276	907.603	147.164	356.892	1.12033	0.0499692
ENSMUSG00000039263	Npepl1	aminopeptidase-like 1 [Source:MGI Symbol;Acc:MGI:2448523]	0.548065	20.5517	6.64948	16.332	1.11914	0.0748099
ENSMUSG00000074637	Sox2	SRY (sex determining region Y)-box 2 [Source:MGI Symbol;Acc:MGI:98364]	7.05274	150.992	75.3002	184.575	1.11811	0.0537532
ENSMUSG00000028228	Cpne3	copine III [Source:MGI Symbol;Acc:MGI:1917818]	1.09464	17.378	6.79487	16.4201	1.11272	0.0453259
ENSMUSG00000060802	B2m	beta-2 microglobulin [Source:MGI Symbol;Acc:MGI:88127]	6.97461	787.857	88.9879	215.045	1.11219	0.0397653
ENSMUSG00000000957	Mmp14	matrix metallopeptidase 14 (membrane-inserted) [Source:MGI Symbol;Acc:MGI:101900]	0.588667	41.0071	21.2084	51.2792	1.11017	0.0299333
ENSMUSG00000049521	Cdc42ep1	CDC42 effector protein (Rho GTPase binding) 1 [Source:MGI Symbol;Acc:MGI:1929763]	0.138122	58.0991	9.83421	23.754	1.1093	0.0384614
ENSMUSG00000050288	Fzd2	frizzled class receptor 2 [Source:MGI Symbol;Acc:MGI:1888513]	0.160315	17.73	7.80084	18.9737	1.1081	0.0582558
ENSMUSG00000031024	St5	suppression of tumorigenicity 5 [Source:MGI Symbol;Acc:MGI:108517]	2.03436	49.7311	7.35351	17.6753	1.10603	0.05257
ENSMUSG00000021823	Vcl	vinculin [Source:MGI Symbol;Acc:MGI:98927]	5.68226	62.5819	8.0248	19.3502	1.10268	0.0281222
ENSMUSG00000030849	Fgfr2	fibroblast growth factor receptor 2 [Source:MGI Symbol;Acc:MGI:95523]	3.08553	77.0376	17.1171	41.2151	1.10136	0.0350241
ENSMUSG00000091586	Cyp4f17	cytochrome P450, family 4, subfamily f, polypeptide 17 [Source:MGI Symbol;Acc:MGI:3646233]	0.525804	15.8803	6.39936	15.4294	1.10003	0.0688751
ENSMUSG00000034109	Golim4	golgi integral membrane protein 4 [Source:MGI Symbol;Acc:MGI:1920374]	0.965248	17.9406	7.36578	17.5751	1.09069	0.0382765
ENSMUSG00000034471	Caskin2	CASK-interacting protein 2 [Source:MGI Symbol;Acc:MGI:2157062]	0.108774	18.6256	5.98521	14.3219	1.09037	0.0340958
ENSMUSG00000024411	Aqp4	aquaporin 4 [Source:MGI Symbol;Acc:MGI:107387]	0.0949453	88.2518	59.9849	142.78	1.08815	0.0353153
ENSMUSG00000025666	Tmem47	transmembrane protein 47 [Source:MGI Symbol;Acc:MGI:2177570]	12.4194	230.744	35.0555	83.2295	1.0861	0.0419588
ENSMUSG00000053110	Yap1	yes-associated protein 1 [Source:MGI Symbol;Acc:MGI:103262]	0.789761	28.6514	6.98103	16.6853	1.08396	0.0450465
ENSMUSG00000020591	Ntsr2	neurotensin receptor 2 [Source:MGI Symbol;Acc:MGI:108018]	0.446237	30.441	7.1565	17.059	1.08324	0.0518948
ENSMUSG00000029413	Naaa	N-acylethanolamine acid amidase [Source:MGI Symbol;Acc:MGI:1914361]	0.924098	56.8351	16.5002	39.3153	1.08167	0.0487619
ENSMUSG00000038776	Ephx1	epoxide hydrolase 1, microsomal [Source:MGI Symbol;Acc:MGI:95405]	1.75838	358.014	57.872	137.654	1.07451	0.0523167
ENSMUSG00000050912	Tmem123	transmembrane protein 123 [Source:MGI Symbol;Acc:MGI:1919179]	1.24622	27.0374	8.18634	19.3524	1.07403	0.0374071
ENSMUSG00000061838	Suclg2	succinate-Coenzyme A ligase, GDP-forming, beta subunit [Source:MGI Symbol;Acc:MGI:1306824]	0.49872	33.0305	9.97392	23.5479	1.06846	0.0400939
ENSMUSG00000024812	Tjp2	tight junction protein 2 [Source:MGI Symbol;Acc:MGI:1341872]	0.720966	26.8114	16.4669	38.8478	1.06732	0.0452534
ENSMUSG00000058135	Gstm1	glutathione S-transferase, mu 1 [Source:MGI Symbol;Acc:MGI:95860]	7.5869	2303.65	244.712	568.768	1.06369	0.11055
ENSMUSG00000029781	Fkbp9	FK506 binding protein 9 [Source:MGI Symbol;Acc:MGI:1350921]	2.80035	117.259	34.034	80.4031	1.06367	0.0591974
ENSMUSG00000026932	Nacc2	nucleus accumbens associated 2, BEN and BTB (POZ) domain containing [Source:MGI Symbol;Acc:MGI:1915241]	5.40996	137.807	28.8884	68.0693	1.0625	0.0509758
ENSMUSG00000028015	Ctso	cathepsin O [Source:MGI Symbol;Acc:MGI:2139628]	0.627349	31.8983	6.35418	14.9177	1.05641	0.0676331
ENSMUSG00000039646	Vasn	vasorin [Source:MGI Symbol;Acc:MGI:2177651]	0.325384	38.5141	7.14666	16.6012	1.05206	0.0549547
ENSMUSG00000020733	Slc9a3r1	solute carrier family 9 (sodium/hydrogen exchanger), member 3 regulator 1 [Source:MGI Symbol;Acc:MGI:1349482]	0.309458	51.504	31.9164	74.6258	1.04947	0.0745634
ENSMUSG00000016534	Lamp2	lysosomal-associated membrane protein 2 [Source:MGI Symbol;Acc:MGI:96748]	8.77359	157.86	35.5292	82.6976	1.04936	0.0405753
ENSMUSG00000048332	Lhfp	lipoma HMGIC fusion partner [Source:MGI Symbol;Acc:MGI:1920048]	5.75169	80.7008	13.0861	30.5326	1.04833	0.07135
ENSMUSG00000052397	Ezr	ezrin [Source:MGI Symbol;Acc:MGI:98931]	2.41862	175.357	57.0491	132.726	1.04791	0.0370597
ENSMUSG00000026600	Soat1	sterol O-acyltransferase 1 [Source:MGI Symbol;Acc:MGI:104665]	1.44047	16.6571	8.53091	19.7449	1.04577	0.0446273
ENSMUSG00000022678	Nde1	nudE neurodevelopment protein 1 [Source:MGI Symbol;Acc:MGI:1914453]	0.343052	43.0183	15.2378	35.3765	1.04488	0.0464794
ENSMUSG00000053062	Jam2	junction adhesion molecule 2 [Source:MGI Symbol;Acc:MGI:1933820]	0.4361	92.0626	26.145	60.246	1.0441	0.0597297
ENSMUSG00000068523	Gng5	guanine nucleotide binding protein (G protein), gamma 5 [Source:MGI Symbol;Acc:MGI:109164]	1.48925	29.4905	10.0141	23.0461	1.03265	0.0555776
ENSMUSG00000030111	A2m	alpha-2-macroglobulin [Source:MGI Symbol;Acc:MGI:2449119]	0.523158	431.409	16.1471	37.0374	1.03079	0.0401069
ENSMUSG00000038388	Mpp6	membrane protein, palmitoylated 6 (MAGUK p55 subfamily member 6) [Source:MGI Symbol;Acc:MGI:1927340]	6.63961	80.9444	17.7193	40.7236	1.03078	0.0490583
ENSMUSG00000019872	Smpdl3a	sphingomyelin phosphodiesterase, acid-like 3A [Source:MGI Symbol;Acc:MGI:1931437]	1.41247	95.1918	13.84	31.8272	1.03016	0.05613
ENSMUSG00000026385	Dbi	diazepam binding inhibitor [Source:MGI Symbol;Acc:MGI:94865]	20.2152	2664.1	638.656	1461.63	1.02531	0.0466912
ENSMUSG00000064036	Mro	maestro [Source:MGI Symbol;Acc:MGI:2152817]	0.886552	17.9567	8.55893	19.5288	1.02203	0.0590837
ENSMUSG00000090122	Kcne1l	potassium voltage-gated channel, Isk-related family, member 1-like, pseudogene [Source:MGI Symbol;Acc:MGI:1913490]	0.140074	22.2901	11.5813	26.4874	1.02059	0.0759299
ENSMUSG00000013076	Amotl1	angiomotin-like 1 [Source:MGI Symbol;Acc:MGI:1922973]	1.66231	31.4641	8.91916	20.3138	1.01982	0.0459403
ENSMUSG00000034573	Ptpn13	protein tyrosine phosphatase, non-receptor type 13 [Source:MGI Symbol;Acc:MGI:103293]	0.747165	24.3015	7.85616	17.8158	1.01508	0.0464798
ENSMUSG00000045817	Zfp36l2	zinc finger protein 36, C3H type-like 2 [Source:MGI Symbol;Acc:MGI:107945]	0.324269	19.8753	11.8694	26.8075	1.0146	0.0736338
ENSMUSG00000039168	Dap	death-associated protein [Source:MGI Symbol;Acc:MGI:1918190]	2.40031	38.0274	7.9551	17.9764	1.01374	0.084764
ENSMUSG00000019359	Gdpd2	glycerophosphodiester phosphodiesterase domain containing 2 [Source:MGI Symbol;Acc:MGI:1918834]	0.628176	54.3027	7.04917	15.907	1.0116	0.0725401
ENSMUSG00000061517	Sox21	SRY (sex determining region Y)-box 21 [Source:MGI Symbol;Acc:MGI:2654070]	0.0570236	30.7897	12.3068	28.0194	1.00913	0.120958
ENSMUSG00000044986	Tst	thiosulfate sulfurtransferase, mitochondrial [Source:MGI Symbol;Acc:MGI:98852]	2.63844	183.366	21.2107	48.4073	1.00653	0.184674
ENSMUSG00000024998	Plce1	phospholipase C, epsilon 1 [Source:MGI Symbol;Acc:MGI:1921305]	0.618429	36.2271	7.70055	17.2613	0.99853	0.0506175
ENSMUSG00000040848	Sft2d2	SFT2 domain containing 2 [Source:MGI Symbol;Acc:MGI:1917362]	0.667948	28.6785	6.37297	14.341	0.996836	0.0875495
ENSMUSG00000030538	Cib1	calcium and integrin binding 1 (calmyrin) [Source:MGI Symbol;Acc:MGI:1344418]	5.2027	73.27	14.0392	31.7428	0.990937	0.256736
ENSMUSG00000020423	Btg2	B cell translocation gene 2, anti-proliferative [Source:MGI Symbol;Acc:MGI:108384]	1.98459	31.3737	10.7266	23.9536	0.987129	0.0725321
ENSMUSG00000053646	Plxnb1	plexin B1 [Source:MGI Symbol;Acc:MGI:2154238]	6.08232	65.7709	25.8408	57.5024	0.984803	0.0690613
ENSMUSG00000040997	Abhd4	abhydrolase domain containing 4 [Source:MGI Symbol;Acc:MGI:1915938]	5.2029	235.464	61.6627	136.896	0.983506	0.0520513
ENSMUSG00000020009	Ifngr1	interferon gamma receptor 1 [Source:MGI Symbol;Acc:MGI:107655]	2.12995	25.2294	7.01576	15.5943	0.981972	0.0775388
ENSMUSG00000024140	Epas1	endothelial PAS domain protein 1 [Source:MGI Symbol;Acc:MGI:109169]	0.118796	38.1549	7.53015	16.6128	0.979838	0.0843959
ENSMUSG00000032667	Pon2	paraoxonase 2 [Source:MGI Symbol;Acc:MGI:106687]	0.310246	78.9235	14.4732	32.1295	0.978707	0.0758563
ENSMUSG00000035805	Mlc1	megalencephalic leukoencephalopathy with subcortical cysts 1 homolog (human) [Source:MGI Symbol;Acc:MGI:2157910]	0.505839	552.077	98.4588	219.899	0.977716	0.173702
ENSMUSG00000013698	Pea15a	phosphoprotein enriched in astrocytes 15A [Source:MGI Symbol;Acc:MGI:104799]	147.343	3909.13	459.227	1018.67	0.977084	0.0583215
ENSMUSG00000055538	Zcchc24	zinc finger, CCHC domain containing 24 [Source:MGI Symbol;Acc:MGI:1919168]	0.128063	97.2231	32.1442	70.9524	0.974733	0.056841
ENSMUSG00000030029	Lrig1	leucine-rich repeats and immunoglobulin-like domains 1 [Source:MGI Symbol;Acc:MGI:107935]	2.09319	46.7572	21.2014	46.9061	0.974157	0.0712944
ENSMUSG00000027007	Ssfa2	sperm specific antigen 2 [Source:MGI Symbol;Acc:MGI:1917849]	2.55493	37.6689	8.83741	19.4902	0.970439	0.0631601
ENSMUSG00000032348	Gsta4	glutathione S-transferase, alpha 4 [Source:MGI Symbol;Acc:MGI:1309515]	12.2037	141.724	48.6658	107.478	0.963113	0.152879
ENSMUSG00000019803	Nr2e1	nuclear receptor subfamily 2, group E, member 1 [Source:MGI Symbol;Acc:MGI:1100526]	0.934304	38.9197	11.9253	25.9408	0.963049	0.115596
ENSMUSG00000061232	H2-K1	histocompatibility 2, K1, K region [Source:MGI Symbol;Acc:MGI:95904]	3.99835	139.253	16.5086	36.3405	0.960592	0.105861
ENSMUSG00000033420	Antxr1	anthrax toxin receptor 1 [Source:MGI Symbol;Acc:MGI:1916788]	1.18248	15.6266	7.36471	15.943	0.954	0.107072
ENSMUSG00000042082	Arsb	arylsulfatase B [Source:MGI Symbol;Acc:MGI:88075]	4.01741	44.9177	7.29645	15.7748	0.952679	0.111085
ENSMUSG00000052957	Gas1	growth arrest specific 1 [Source:MGI Symbol;Acc:MGI:95655]	0.869616	76.2177	10.9626	23.8975	0.951673	0.0905606
ENSMUSG00000031990	Jam3	junction adhesion molecule 3 [Source:MGI Symbol;Acc:MGI:1933825]	7.74185	96.3139	11.4965	25.0713	0.948184	0.117764
ENSMUSG00000026923	Notch1	notch 1 [Source:MGI Symbol;Acc:MGI:97363]	0.0952436	32.9988	10.6429	22.8037	0.946554	0.17751
ENSMUSG00000015305	Sash1	SAM and SH3 domain containing 1 [Source:MGI Symbol;Acc:MGI:1917347]	1.49924	28.3789	12.7796	27.4005	0.93635	0.079742
ENSMUSG00000030934	Oat	ornithine aminotransferase [Source:MGI Symbol;Acc:MGI:97394]	26.3883	470.842	57.2224	122.873	0.927818	0.107159
ENSMUSG00000020432	Tcn2	transcobalamin 2 [Source:MGI Symbol;Acc:MGI:98534]	0.544882	43.3934	8.16847	17.4212	0.924254	0.100337
ENSMUSG00000024782	Ak3	adenylate kinase 3 [Source:MGI Symbol;Acc:MGI:1860835]	8.24319	113.544	38.953	83.2508	0.923774	0.0815232
ENSMUSG00000065979	Cpped1	calcineurin-like phosphoesterase domain containing 1 [Source:MGI Symbol;Acc:MGI:2443300]	3.09087	36.8662	9.90017	21.1249	0.9183	0.113536
ENSMUSG00000027447	Cst3	cystatin C [Source:MGI Symbol;Acc:MGI:102519]	208.314	7895.09	635.78	1362.39	0.917814	0.213245
ENSMUSG00000019055	Plod1	procollagen-lysine, 2-oxoglutarate 5-dioxygenase 1 [Source:MGI Symbol;Acc:MGI:99907]	0.833892	17.125	7.60192	16.1883	0.916916	0.127711
ENSMUSG00000021417	Eci2	enoyl-Coenzyme A delta isomerase 2 [Source:MGI Symbol;Acc:MGI:1346064]	2.35787	31.8193	12.9252	27.4683	0.914825	0.0954443
ENSMUSG00000062078	Qk	quaking [Source:MGI Symbol;Acc:MGI:97837]	7.47597	109.137	88.1479	184.553	0.91146	0.173604
ENSMUSG00000024654	Asrgl1	asparaginase like 1 [Source:MGI Symbol;Acc:MGI:1913764]	5.12291	116.033	52.9465	112.141	0.909	0.115956
ENSMUSG00000064373	Selenop	selenoprotein P [Source:MGI Symbol;Acc:MGI:894288]	0.558032	37.164	17.5364	36.8159	0.905418	0.100337
ENSMUSG00000038587	Akap12	A kinase (PRKA) anchor protein (gravin) 12 [Source:MGI Symbol;Acc:MGI:1932576]	3.94392	49.6302	18.2551	38.3051	0.904857	0.0965983
ENSMUSG00000031665	Sall1	sal-like 1 (Drosophila) [Source:MGI Symbol;Acc:MGI:1889585]	0.745478	22.6739	9.15954	18.9988	0.901568	0.247646
ENSMUSG00000026466	Tor1aip1	torsin A interacting protein 1 [Source:MGI Symbol;Acc:MGI:3582693]	2.49573	26.7837	8.17691	16.9861	0.897445	0.164904
ENSMUSG00000022261	Sdc2	syndecan 2 [Source:MGI Symbol;Acc:MGI:1349165]	10.3213	125.079	17.6713	36.8571	0.892405	0.0896361
ENSMUSG00000008734	Gprc5b	G protein-coupled receptor, family C, group 5, member B [Source:MGI Symbol;Acc:MGI:1927596]	3.51319	85.1532	30.045	62.836	0.889938	0.138844
ENSMUSG00000054252	Fgfr3	fibroblast growth factor receptor 3 [Source:MGI Symbol;Acc:MGI:95524]	1.25779	53.007	14.8549	31.0285	0.889365	0.130513
ENSMUSG00000001700	Gramd3	GRAM domain containing 3 [Source:MGI Symbol;Acc:MGI:1914815]	0.135655	20.0785	6.63787	13.8249	0.888706	0.114965
ENSMUSG00000022122	Ednrb	endothelin receptor type B [Source:MGI Symbol;Acc:MGI:102720]	0.457733	90.7882	81.7061	169.281	0.887441	0.104707
ENSMUSG00000039830	Olig2	oligodendrocyte transcription factor 2 [Source:MGI Symbol;Acc:MGI:1355331]	0.0547152	39.8869	45.3149	94.4604	0.885653	0.120746
ENSMUSG00000027087	Itgav	integrin alpha V [Source:MGI Symbol;Acc:MGI:96608]	1.3383	30.9143	8.65608	17.9065	0.884281	0.105007
ENSMUSG00000031232	Magt1	magnesium transporter 1 [Source:MGI Symbol;Acc:MGI:1914325]	1.32144	19.2236	11.8521	24.5208	0.881529	0.1147
ENSMUSG00000019818	Cd164	CD164 antigen [Source:MGI Symbol;Acc:MGI:1859568]	7.68338	93.1141	19.6017	40.4582	0.880375	0.105444
ENSMUSG00000056515	Rab31	RAB31, member RAS oncogene family [Source:MGI Symbol;Acc:MGI:1914603]	14.4505	346.92	62.4886	129.516	0.876742	0.126026
ENSMUSG00000044708	Kcnj10	potassium inwardly-rectifying channel, subfamily J, member 10 [Source:MGI Symbol;Acc:MGI:1194504]	0.31103	396.73	37.9829	77.7543	0.87312	0.134344
ENSMUSG00000025283	Sat1	spermidine/spermine N1-acetyl transferase 1 [Source:MGI Symbol;Acc:MGI:98233]	5.511	88.8049	14.1482	29.3415	0.873	0.253437
ENSMUSG00000001864	Aif1l	allograft inflammatory factor 1-like [Source:MGI Symbol;Acc:MGI:1919598]	0.562828	26.6741	9.38885	19.3426	0.872217	0.124133
ENSMUSG00000025978	Rftn2	raftlin family member 2 [Source:MGI Symbol;Acc:MGI:1921263]	0.136025	23.5452	6.64666	13.6549	0.871767	0.122496
ENSMUSG00000073411	H2-D1	histocompatibility 2, D region locus 1 [Source:MGI Symbol;Acc:MGI:95896]	21.1334	259.137	47.3719	98.1871	0.870867	0.198081
ENSMUSG00000029669	Tspan12	tetraspanin 12 [Source:MGI Symbol;Acc:MGI:1889818]	1.61149	34.6757	15.8135	32.6019	0.86881	0.168558
ENSMUSG00000003623	Crot	carnitine O-octanoyltransferase [Source:MGI Symbol;Acc:MGI:1921364]	2.31672	33.2473	12.7978	26.3893	0.865982	0.17751
ENSMUSG00000022136	Dnajc3	DnaJ heat shock protein family (Hsp40) member C3 [Source:MGI Symbol;Acc:MGI:107373]	4.64003	50.6468	13.3494	27.3243	0.863177	0.112091
ENSMUSG00000036402	Gng12	guanine nucleotide binding protein (G protein), gamma 12 [Source:MGI Symbol;Acc:MGI:1336171]	2.43327	39.7393	24.9757	50.9179	0.862707	0.112556
ENSMUSG00000025809	Itgb1	integrin beta 1 (fibronectin receptor beta) [Source:MGI Symbol;Acc:MGI:96610]	12.2534	181.038	49.2347	100.053	0.853137	0.104181
ENSMUSG00000033577	Myo6	myosin VI [Source:MGI Symbol;Acc:MGI:104785]	1.23296	35.4902	16.5236	33.4048	0.852393	0.130727
ENSMUSG00000032374	Plod2	procollagen lysine, 2-oxoglutarate 5-dioxygenase 2 [Source:MGI Symbol;Acc:MGI:1347007]	2.97684	40.9968	9.43573	18.94	0.840431	0.13579
ENSMUSG00000041801	Phlda3	pleckstrin homology like domain, family A, member 3 [Source:MGI Symbol;Acc:MGI:1351485]	7.08971	94.9262	16.1711	32.8559	0.840104	0.29567
ENSMUSG00000027253	Lrp4	low density lipoprotein receptor-related protein 4 [Source:MGI Symbol;Acc:MGI:2442252]	0.0431642	37.3979	9.57902	19.1986	0.83655	0.144253
ENSMUSG00000027168	Pax6	paired box 6 [Source:MGI Symbol;Acc:MGI:97490]	0.645553	18.3959	7.02969	14.0744	0.832901	0.143902
ENSMUSG00000028211	Trp53inp1	transformation related protein 53 inducible nuclear protein 1 [Source:MGI Symbol;Acc:MGI:1926609]	2.99452	34.8958	11.3193	22.5215	0.827606	0.135219
ENSMUSG00000021133	Susd6	sushi domain containing 6 [Source:MGI Symbol;Acc:MGI:2444661]	5.37875	85.5041	13.5599	26.7562	0.813131	0.136209
ENSMUSG00000049154	Fam183b	family with sequence similarity 183, member B [Source:MGI Symbol;Acc:MGI:1922679]	2.00396	50.4982	9.06049	17.8893	0.805101	0.318898
ENSMUSG00000024892	Pcx	pyruvate carboxylase [Source:MGI Symbol;Acc:MGI:97520]	5.64742	115.991	18.0503	35.6325	0.805071	0.204731
ENSMUSG00000047557	Lxn	latexin [Source:MGI Symbol;Acc:MGI:107633]	15.8396	329.57	45.8167	89.5959	0.801453	0.150755
ENSMUSG00000030894	Tpp1	tripeptidyl peptidase I [Source:MGI Symbol;Acc:MGI:1336194]	3.44419	53.1532	17.55	33.9505	0.793824	0.230503
ENSMUSG00000029178	Klf3	Kruppel-like factor 3 (basic) [Source:MGI Symbol;Acc:MGI:1342773]	2.21859	26.9403	8.6918	16.7793	0.792071	0.245174
ENSMUSG00000007097	Atp1a2	ATPase, Na+/K+ transporting, alpha 2 polypeptide [Source:MGI Symbol;Acc:MGI:88106]	0.408652	103.744	80.0724	155.591	0.783276	0.220774
ENSMUSG00000010064	Slc38a3	solute carrier family 38, member 3 [Source:MGI Symbol;Acc:MGI:1923507]	0.315766	46.5582	41.0244	79.2159	0.781177	0.152879
ENSMUSG00000005360	Slc1a3	solute carrier family 1 (glial high affinity glutamate transporter), member 3 [Source:MGI Symbol;Acc:MGI:99917]	2.2932	333.794	310.215	596.887	0.77569	0.150903
ENSMUSG00000020019	Ntn4	netrin 4 [Source:MGI Symbol;Acc:MGI:1888978]	1.09585	77.0482	6.99494	13.4866	0.772387	0.206906
ENSMUSG00000007891	Ctsd	cathepsin D [Source:MGI Symbol;Acc:MGI:88562]	50.1204	589.145	65.1176	125.648	0.772004	0.220225
ENSMUSG00000035274	Tpbg	trophoblast glycoprotein [Source:MGI Symbol;Acc:MGI:1341264]	2.50957	28.888	8.43394	16.107	0.770278	0.206003
ENSMUSG00000031610	Scrg1	scrapie responsive gene 1 [Source:MGI Symbol;Acc:MGI:1328308]	0.715004	72.4958	9.65726	18.498	0.770243	0.320166
ENSMUSG00000027111	Itga6	integrin alpha 6 [Source:MGI Symbol;Acc:MGI:96605]	2.23916	32.09	21.5236	40.9437	0.762226	0.175048
ENSMUSG00000033720	Sfxn5	sideroflexin 5 [Source:MGI Symbol;Acc:MGI:2137681]	4.98186	103.512	49.2844	93.441	0.752293	0.209802
ENSMUSG00000023913	Pla2g7	phospholipase A2, group VII (platelet-activating factor acetylhydrolase, plasma) [Source:MGI Symbol;Acc:MGI:1351327]	1.3285	347.114	51.6314	97.262	0.747412	0.19545
ENSMUSG00000004892	Bcan	brevican [Source:MGI Symbol;Acc:MGI:1096385]	0.800762	51.9177	104.654	197.339	0.737687	0.301802
ENSMUSG00000021010	Npas3	neuronal PAS domain protein 3 [Source:MGI Symbol;Acc:MGI:1351610]	1.19398	13.7186	11.8063	21.9161	0.730169	0.230215
ENSMUSG00000035095	Fam167a	family with sequence similarity 167, member A [Source:MGI Symbol;Acc:MGI:3606565]	0.923024	20.4756	11.9713	22.1812	0.729766	0.259768
ENSMUSG00000053398	Phgdh	3-phosphoglycerate dehydrogenase [Source:MGI Symbol;Acc:MGI:1355330]	2.21657	63.7391	78.1748	146.051	0.72218	0.301118
ENSMUSG00000037206	Islr	immunoglobulin superfamily containing leucine-rich repeat [Source:MGI Symbol;Acc:MGI:1349645]	0.826782	237.995	41.2299	76.6049	0.716735	0.275315
ENSMUSG00000022817	Itgb5	integrin beta 5 [Source:MGI Symbol;Acc:MGI:96614]	0.698642	107.824	26.446	49.0322	0.713714	0.282114
ENSMUSG00000070348	Ccnd1	cyclin D1 [Source:MGI Symbol;Acc:MGI:88313]	0.720247	129.762	13.7046	25.304	0.709959	0.245051
ENSMUSG00000028645	Slc2a1	solute carrier family 2 (facilitated glucose transporter), member 1 [Source:MGI Symbol;Acc:MGI:95755]	5.19634	59.0084	14.8541	27.411	0.702537	0.383201
ENSMUSG00000008035	Mid1ip1	Mid1 interacting protein 1 (gastrulation specific G12-like (zebrafish)) [Source:MGI Symbol;Acc:MGI:1915291]	10.6161	139.894	41.4978	76.1697	0.688904	0.505456
ENSMUSG00000029570	Lfng	LFNG O-fucosylpeptide 3-beta-N-acetylglucosaminyltransferase [Source:MGI Symbol;Acc:MGI:1095413]	0.0692812	55.7569	18.5863	33.7557	0.683235	0.332791
ENSMUSG00000020052	Ascl1	achaete-scute family bHLH transcription factor 1 [Source:MGI Symbol;Acc:MGI:96919]	1.47565	18.8238	18.4042	33.1168	0.681338	0.254833
ENSMUSG00000000184	Ccnd2	cyclin D2 [Source:MGI Symbol;Acc:MGI:88314]	4.32431	123.734	76.6295	137.652	0.675005	0.239634
ENSMUSG00000028517	Plpp3	phospholipid phosphatase 3 [Source:MGI Symbol;Acc:MGI:1915166]	2.58593	249.698	100.666	180.035	0.670381	0.246371
ENSMUSG00000024033	Rsph1	radial spoke head 1 homolog (Chlamydomonas) [Source:MGI Symbol;Acc:MGI:1194909]	4.09797	61.6773	24.2116	43.3475	0.663192	0.378848
ENSMUSG00000067279	Ppp1r3c	protein phosphatase 1, regulatory (inhibitor) subunit 3C [Source:MGI Symbol;Acc:MGI:1858229]	1.21772	13.4602	12.9723	23.0607	0.659722	0.292849
ENSMUSG00000059970	Hspa2	heat shock protein 2 [Source:MGI Symbol;Acc:MGI:96243]	2.48006	38.0524	20.0794	35.624	0.646807	0.446281
ENSMUSG00000022018	Rgcc	regulator of cell cycle [Source:MGI Symbol;Acc:MGI:1913464]	1.08543	20.3784	22.7215	40.1159	0.643045	0.41704
ENSMUSG00000026679	Enkur	enkurin, TRPC channel interacting protein [Source:MGI Symbol;Acc:MGI:1918483]	2.35619	42.8559	7.98338	13.783	0.625807	0.426632
ENSMUSG00000032281	Acsbg1	acyl-CoA synthetase bubblegum family member 1 [Source:MGI Symbol;Acc:MGI:2385656]	0.480943	113.189	43.6829	76.346	0.624985	0.436621
ENSMUSG00000004902	Slc25a18	solute carrier family 25 (mitochondrial carrier), member 18 [Source:MGI Symbol;Acc:MGI:1919053]	0.404094	256.261	25.6931	43.6909	0.590838	0.38933
ENSMUSG00000060961	Slc4a4	solute carrier family 4 (anion exchanger), member 4 [Source:MGI Symbol;Acc:MGI:1927555]	1.27295	54.794	27.4711	45.6656	0.571671	0.41325
ENSMUSG00000025911	Adhfe1	alcohol dehydrogenase, iron containing, 1 [Source:MGI Symbol;Acc:MGI:1923437]	0.0570815	16.729	7.7926	12.926	0.562133	0.412861
ENSMUSG00000028655	Mfsd2a	major facilitator superfamily domain containing 2A [Source:MGI Symbol;Acc:MGI:1923824]	0.777465	86.0916	20.0638	33.0843	0.546907	0.440119
ENSMUSG00000045092	S1pr1	sphingosine-1-phosphate receptor 1 [Source:MGI Symbol;Acc:MGI:1096355]	0.200352	43.2677	41.8761	67.8251	0.532327	0.445366
ENSMUSG00000020538	Srebf1	sterol regulatory element binding transcription factor 1 [Source:MGI Symbol;Acc:MGI:107606]	2.23113	115.675	48.9291	77.9165	0.497371	0.508982
ENSMUSG00000021750	Fam107a	family with sequence similarity 107, member A [Source:MGI Symbol;Acc:MGI:3041256]	0.27803	10.588	18.6404	29.5453	0.493821	0.499877
ENSMUSG00000022505	Emp2	epithelial membrane protein 2 [Source:MGI Symbol;Acc:MGI:1098726]	1.2511	41.1478	23.2913	36.7976	0.487842	0.503744
ENSMUSG00000046160	Olig1	oligodendrocyte transcription factor 1 [Source:MGI Symbol;Acc:MGI:1355334]	0.231785	204.267	102.672	155.494	0.423751	0.595106
ENSMUSG00000037071	Scd1	stearoyl-Coenzyme A desaturase 1 [Source:MGI Symbol;Acc:MGI:98239]	3.27174	80.2916	77.9209	114.926	0.383315	0.666712
ENSMUSG00000038156	Spon1	spondin 1, (f-spondin) extracellular matrix protein [Source:MGI Symbol;Acc:MGI:2385287]	3.55078	59.7869	19.715	28.7968	0.373554	0.652139
ENSMUSG00000004035	Gstm7	glutathione S-transferase, mu 7 [Source:MGI Symbol;Acc:MGI:1915562]	1.9943	34.6162	8.71791	12.6608	0.365349	0.713066
ENSMUSG00000026473	Glul	glutamate-ammonia ligase (glutamine synthetase) [Source:MGI Symbol;Acc:MGI:95739]	34.3817	468.824	288.31	402.61	0.304758	0.773559
ENSMUSG00000017390	Aldoc	aldolase C, fructose-bisphosphate [Source:MGI Symbol;Acc:MGI:101863]	3.96691	605.28	146.548	202.704	0.283022	0.841603
ENSMUSG00000030235	Slco1c1	solute carrier organic anion transporter family, member 1c1 [Source:MGI Symbol;Acc:MGI:1889679]	0.226268	13.1199	31.318	41.1188	0.223008	0.836728
ENSMUSG00000022899	Slc15a2	solute carrier family 15 (H+/peptide transporter), member 2 [Source:MGI Symbol;Acc:MGI:1890457]	0.134113	37.9795	13.0493	16.6371	0.178637	0.883357
ENSMUSG00000030605	Mfge8	milk fat globule-EGF factor 8 protein [Source:MGI Symbol;Acc:MGI:102768]	2.82617	67.5679	132.545	160.514	0.103687	0.936904
ENSMUSG00000019874	Fabp7	fatty acid binding protein 7, brain [Source:MGI Symbol;Acc:MGI:101916]	9.27474	888.542	680.89	828.545	0.0951648	0.96345
ENSMUSG00000026730	Pter	phosphotriesterase related [Source:MGI Symbol;Acc:MGI:107372]	0.0349133	18.242	12.0527	13.9354	0.047471	0.976745
ENSMUSG00000029231	Pdgfra	platelet derived growth factor receptor, alpha polypeptide [Source:MGI Symbol;Acc:MGI:97530]	0.100334	24.2102	34.7045	40.2477	0.0445839	0.975095
ENSMUSG00000006205	Htra1	HtrA serine peptidase 1 [Source:MGI Symbol;Acc:MGI:1929076]	1.59671	29.6157	15.5602	16.868	-0.0579826	0.969943

## Sheet: Figure 4c
gene_name	description	chromosome	strand	exonStart_0base	exonEnd	upstreamES.x	upstreamEE	downstreamES	downstreamEE.x	KCl vs Con (Ding data) p-value	KCl vs Con (Ding data) adjusted p-value (FDR)	KCl vs Con (Ding data) inclusion level difference	Astrocyte vs. Neuron p-value	Astrocyte vs. Neuron adjusted p-value (FDR)	Astrocyte vs. Neuron inclusion level difference
Pdlim7	PDZ and LIM domain 7 [Source:MGI Symbol;Acc:MGI:1914649]	13	-	55507863	55507880	55507487	55507624	55508779	55508810	1.91558e-12	8.82779e-10	0.617	0	0	0.856
Osbpl6	oxysterol binding protein-like 6 [Source:MGI Symbol;Acc:MGI:2139014]	2	+	76555889	76555982	76555013	76555117	76560185	76560260	1.37773e-07	1.79861e-05	0.6	0	0	0.874
Dock4	dedicator of cytokinesis 4 [Source:MGI Symbol;Acc:MGI:1918006]	12	+	40794596	40794623	40790075	40790161	40794767	40794863	1.97416e-08	3.26146e-06	0.58	0	0	1
Mfsd6	major facilitator superfamily domain containing 6 [Source:MGI Symbol;Acc:MGI:1922925]	1	-	52658698	52658723	52656526	52658545	52660806	52661087	2.64227e-07	3.2224e-05	0.571	0	0	0.916
Trim9	tripartite motif-containing 9 [Source:MGI Symbol;Acc:MGI:2137354]	12	-	70252019	70252043	70251010	70251260	70252442	70252484	0.000496276	0.0255611	0.556	0	0	0.995
Ptprk	protein tyrosine phosphatase, receptor type, K [Source:MGI Symbol;Acc:MGI:103310]	10	+	28562106	28562142	28560150	28560165	28566494	28566679	7.20579e-12	2.96913e-09	0.552	0	0	0.912
Bbs9	Bardet-Biedl syndrome 9 (human) [Source:MGI Symbol;Acc:MGI:2442833]	9	+	22648019	22648034	22645963	22646068	22655224	22655365	1.36684e-06	0.000139569	0.552	0	0	1
Gnas	GNAS (guanine nucleotide binding protein, alpha stimulating) complex locus [Source:MGI Symbol;Acc:MGI:95777]	2	+	174328107	174328131	174327756	174327941	174334211	174334284	1.07259e-09	2.57304e-07	0.551	0	0	0.825
Ank2	ankyrin 2, brain [Source:MGI Symbol;Acc:MGI:88025]	3	-	127052225	127052249	127048181	127048280	127052687	127052873	8.10463e-15	5.35578e-12	0.55	0	0	0.88
Adgrl2	adhesion G protein-coupled receptor L2 [Source:MGI Symbol;Acc:MGI:2139714]	3	-	148821279	148821408	148817092	148817928	148822954	148823051	1.70181e-06	0.000170786	0.546	0	0	0.875
Asph	aspartate-beta-hydroxylase [Source:MGI Symbol;Acc:MGI:1914186]	4	-	9637658	9637703	9635900	9635969	9639197	9639347	9.99201e-16	7.60783e-13	0.544	0	0	0.966
Vti1a	vesicle transport through interaction with t-SNAREs 1A [Source:MGI Symbol;Acc:MGI:1855699]	19	+	55387188	55387209	55380941	55381019	55391783	55391868	0	0	0.539	0	0	0.889
Ccser2	coiled-coil serine rich 2 [Source:MGI Symbol;Acc:MGI:101859]	14	-	36885750	36885790	36879095	36879762	36890341	36890426	3.5545e-08	5.50853e-06	0.528	0	0	0.99
Ehbp1	EH domain binding protein 1 [Source:MGI Symbol;Acc:MGI:2667252]	11	-	22062779	22062887	22059136	22059261	22068358	22068506	1.11022e-16	9.48401e-14	0.526	0	0	0.908
Agfg2	ArfGAP with FG repeats 2 [Source:MGI Symbol;Acc:MGI:2443267]	5	-	137660161	137660194	137655607	137655728	137661363	137661489	6.23191e-09	1.15485e-06	0.526	0	0	0.746
Clec16a	C-type lectin domain family 16, member A [Source:MGI Symbol;Acc:MGI:1921624]	16	+	10572917	10572923	10571493	10571599	10573299	10573423	6.53021e-08	9.49021e-06	0.525	0	0	0.967
Aftph	aftiphilin [Source:MGI Symbol;Acc:MGI:1923012]	11	-	20696750	20696831	20692464	20692588	20698312	20698373	3.55222e-05	0.00253904	0.524	0	0	0.72
Nrcam	neuronal cell adhesion molecule [Source:MGI Symbol;Acc:MGI:104750]	12	+	44578144	44578180	44576603	44576780	44590107	44590239	1.03685e-09	2.52186e-07	0.52	0	0	0.943
Nrcam	neuronal cell adhesion molecule [Source:MGI Symbol;Acc:MGI:104750]	12	+	44566839	44566869	44566287	44566412	44568543	44568645	1.51516e-09	3.42368e-07	0.52	0	0	0.943
Mon2	MON2 homolog, regulator of endosome to Golgi trafficking [Source:MGI Symbol;Acc:MGI:1914324]	10	-	123023085	123023088	123022833	123022944	123023909	123024011	1.55946e-10	4.70848e-08	0.518	0	0	0.917
Dock9	dedicator of cytokinesis 9 [Source:MGI Symbol;Acc:MGI:106321]	14	-	121544575	121544583	121542505	121543625	121545965	121546104	2.25506e-06	0.00021818	0.518	0	0	0.989
Dtnb	dystrobrevin, beta [Source:MGI Symbol;Acc:MGI:1203728]	12	+	3754095	3754116	3751810	3751907	3772586	3772746	6.0738e-10	1.58753e-07	0.515	0	0	0.759
Atp2b4	ATPase, Ca++ transporting, plasma membrane 4 [Source:MGI Symbol;Acc:MGI:88111]	1	-	133711641	133711822	133706310	133706996	133715053	133715230	0	0	0.514	0	0	0.85
Daam1	dishevelled associated activator of morphogenesis 1 [Source:MGI Symbol;Acc:MGI:1914596]	12	+	71958746	71958773	71952451	71952559	71959805	71959912	4.88465e-06	0.000433114	0.514	0	0	0.968
Bin1	bridging integrator 1 [Source:MGI Symbol;Acc:MGI:108092]	18	+	32414944	32415037	32414182	32414290	32419842	32419928	0	0	0.512	0	0	0.941
Iqsec2	IQ motif and Sec7 domain 2 [Source:MGI Symbol;Acc:MGI:3528396]	X	+	152222282	152222332	152221646	152221820	152222921	152225236	3.84999e-10	1.05532e-07	0.511	0	0	0.779
Kif1b	kinesin family member 1B [Source:MGI Symbol;Acc:MGI:108426]	4	-	149265344	149265362	149263614	149263690	149266251	149266317	1.56541e-14	9.79055e-12	0.51	0	0	0.982
Erc1	ELKS/RAB6-interacting/CAST family member 1 [Source:MGI Symbol;Acc:MGI:2151013]	6	-	119734080	119734092	119722172	119722308	119743287	119743481	4.9037e-08	7.33962e-06	0.51	0	0	0.938
Abi2	abl-interactor 2 [Source:MGI Symbol;Acc:MGI:106913]	1	+	60450169	60450253	60448077	60448202	60453603	60453762	9.64451e-13	4.62725e-10	0.509	0	0	0.977
Erc1	ELKS/RAB6-interacting/CAST family member 1 [Source:MGI Symbol;Acc:MGI:2151013]	6	-	119618845	119618912	119594784	119594973	119620310	119620409	2.65036e-09	5.49267e-07	0.509	0	0	0.976
Ocrl	OCRL, inositol polyphosphate-5-phosphatase [Source:MGI Symbol;Acc:MGI:109589]	X	+	47956209	47956233	47948124	47948360	47960452	47960569	8.06336e-07	8.77053e-05	0.509	0	0	0.934
Ank2	ankyrin 2, brain [Source:MGI Symbol;Acc:MGI:88025]	3	-	126963382	126963481	126962250	126962405	126964937	126965162	0	0	0.508	0	0	0.921
Pls3	plastin 3 (T-isoform) [Source:MGI Symbol;Acc:MGI:104807]	X	-	75799716	75799743	75799394	75799490	75800501	75800644	2.22045e-16	1.85164e-13	0.505	0	0	0.965
Camta2	calmodulin binding transcription activator 2 [Source:MGI Symbol;Acc:MGI:2135957]	11	-	70670890	70670911	70670548	70670736	70671007	70671079	1.17107e-09	2.79018e-07	0.504	0	0	0.981
Dnm3	dynamin 3 [Source:MGI Symbol;Acc:MGI:1341299]	1	-	162045385	162045397	162019827	162019992	162084032	162084144	4.18971e-08	6.35239e-06	0.504	0	0	0.887
Arfgap1	ADP-ribosylation factor GTPase activating protein 1 [Source:MGI Symbol;Acc:MGI:2183559]	2	+	180978411	180978441	180977319	180977352	180979170	180979227	5.55112e-16	4.41869e-13	0.502	0	0	0.988
Ipo11	importin 11 [Source:MGI Symbol;Acc:MGI:2442377]	13	-	106857498	106857525	106857228	106857308	106860860	106860937	1.32301e-07	1.742e-05	0.501	0	0	0.826
Ehbp1	EH domain binding protein 1 [Source:MGI Symbol;Acc:MGI:2667252]	11	-	22151787	22151892	22151066	22151189	22169034	22169174	1.12044e-05	0.000910493	0.5	0	0	0.973
Myo5a	myosin VA [Source:MGI Symbol;Acc:MGI:105976]	9	+	75187521	75187530	75185894	75186122	75189899	75190000	1.8307e-05	0.00142169	0.5	0	0	1
6430548M08Rik	RIKEN cDNA 6430548M08 gene [Source:MGI Symbol;Acc:MGI:2443793]	8	+	120157467	120157497	120156296	120156374	120159958	120160039	0	0	0.499	0	0	0.793
Rubcn	RUN domain and cysteine-rich domain containing, Beclin 1-interacting protein [Source:MGI Symbol;Acc:MGI:1915160]	16	-	32841536	32841581	32838237	32838353	32842997	32843531	1.67116e-07	2.12839e-05	0.499	0	0	0.978
Eif4g1	eukaryotic translation initiation factor 4, gamma 1 [Source:MGI Symbol;Acc:MGI:2384784]	16	+	20674785	20674806	20674227	20674314	20675343	20675520	1.11022e-16	9.48401e-14	0.497	0	0	0.989
Vps8	VPS8 CORVET complex subunit [Source:MGI Symbol;Acc:MGI:2146407]	16	+	21451355	21451361	21448348	21448403	21456228	21456353	5.13963e-08	7.66001e-06	0.497	0	0	0.757
Etl4	enhancer trap locus 4 [Source:MGI Symbol;Acc:MGI:95454]	2	+	20759546	20759651	20743458	20744291	20760214	20760264	2.47028e-07	3.03576e-05	0.497	4.21885e-15	1.21422e-13	0.749
Inpp4a	inositol polyphosphate-4-phosphatase, type I [Source:MGI Symbol;Acc:MGI:1931123]	1	+	37374271	37374289	37372310	37372419	37377577	37377761	5.94123e-07	6.66941e-05	0.496	0	0	0.939
Sh3glb2	SH3-domain GRB2-like endophilin B2 [Source:MGI Symbol;Acc:MGI:2385131]	2	-	30349225	30349237	30348554	30348617	30350287	30350380	2.8555e-10	8.00087e-08	0.495	0	0	0.987
Nfasc	neurofascin [Source:MGI Symbol;Acc:MGI:104753]	1	-	132637863	132637881	132636985	132637091	132642677	132642858	2.54574e-13	1.36861e-10	0.494	0	0	0.959
Afdn	afadin, adherens junction formation factor [Source:MGI Symbol;Acc:MGI:1314653]	17	+	13825942	13825987	13823290	13823458	13828928	13829023	9.04833e-10	2.24758e-07	0.493	0	0	0.954
Camsap2	calmodulin regulated spectrin-associated protein family, member 2 [Source:MGI Symbol;Acc:MGI:1922434]	1	-	136297283	136297316	136293279	136293421	136297741	136297825	2.45045e-11	9.13028e-09	0.491	0	0	0.979
Dctn1	dynactin 1 [Source:MGI Symbol;Acc:MGI:107745]	6	+	83197318	83197333	83195940	83196107	83197490	83197624	5.88259e-11	1.9437e-08	0.489	0	0	0.979
Wdr35	WD repeat domain 35 [Source:MGI Symbol;Acc:MGI:1921932]	12	+	8995639	8995672	8989904	8990090	8996068	8996129	2.86892e-07	3.47231e-05	0.489	0	0	0.962
Nrcam	neuronal cell adhesion molecule [Source:MGI Symbol;Acc:MGI:104750]	12	+	44535056	44535074	44532582	44532659	44537250	44537356	2.62389e-10	7.47147e-08	0.488	0	0	0.752
Ptprf	protein tyrosine phosphatase, receptor type, F [Source:MGI Symbol;Acc:MGI:102695]	4	-	118227818	118227845	118226453	118226571	118230694	118230888	0	0	0.485	0	0	0.993
Apbb1	amyloid beta (A4) precursor protein-binding, family B, member 1 [Source:MGI Symbol;Acc:MGI:107765]	7	-	105565945	105565951	105565532	105565647	105566050	105566178	2.90171e-06	0.000273934	0.485	0	0	0.971
Trappc9	trafficking protein particle complex 9 [Source:MGI Symbol;Acc:MGI:1923760]	15	-	73042176	73042203	73031521	73031643	73050594	73050723	8.39929e-08	1.18888e-05	0.484	0	0	0.686
Kif2a	kinesin family member 2A [Source:MGI Symbol;Acc:MGI:108390]	13	-	106969703	106969817	106968637	106968788	106974494	106974562	7.13345e-07	7.85667e-05	0.484	0	0	0.938
Mcf2l	mcf.2 transforming sequence-like [Source:MGI Symbol;Acc:MGI:103263]	8	+	13013914	13014007	13013534	13013650	13017346	13017439	9.9568e-05	0.00638694	0.483	0	0	0.929
Clasp2	CLIP associating protein 2 [Source:MGI Symbol;Acc:MGI:1923749]	9	+	113878749	113878773	113876243	113876350	113879941	113880186	1.44329e-15	1.07553e-12	0.482	0	0	0.954
Fbxo25	F-box protein 25 [Source:MGI Symbol;Acc:MGI:1914072]	8	+	13938921	13938948	13935145	13935289	13939562	13940521	4.50226e-07	5.17007e-05	0.482	0	0	0.968
Mef2d	myocyte enhancer factor 2D [Source:MGI Symbol;Acc:MGI:99533]	3	+	88161780	88161801	88161190	88161381	88162957	88163087	3.61281e-06	0.000329519	0.482	0	0	0.935
Atp2b4	ATPase, Ca++ transporting, plasma membrane 4 [Source:MGI Symbol;Acc:MGI:88111]	1	-	133711631	133711822	133702673	133706996	133715053	133715230	0	0	0.48	0	0	0.843
Ptprd	protein tyrosine phosphatase, receptor type, D [Source:MGI Symbol;Acc:MGI:97812]	4	-	76135544	76135556	76133062	76133332	76136810	76136921	0.000105769	0.00674763	0.48	0	0	0.991
Camk2g	calcium/calmodulin-dependent protein kinase II gamma [Source:MGI Symbol;Acc:MGI:88259]	14	-	20747818	20747851	20744603	20744648	20755658	20755702	3.39323e-06	0.000312749	0.479	0	0	0.943
Tbc1d24	TBC1 domain family, member 24 [Source:MGI Symbol;Acc:MGI:2443456]	17	-	24184380	24184398	24183693	24183852	24185203	24186201	3.08191e-05	0.00224014	0.479	0	0	0.781
Clasp2	CLIP associating protein 2 [Source:MGI Symbol;Acc:MGI:1923749]	9	+	113858580	113858604	113854172	113854346	113862185	113862287	1.78315e-10	5.24815e-08	0.478	0	0	0.928
Abi2	abl-interactor 2 [Source:MGI Symbol;Acc:MGI:106913]	1	+	60438941	60438959	60437055	60437232	60443984	60444082	0	0	0.476	0	0	0.977
Arhgap23	Rho GTPase activating protein 23 [Source:MGI Symbol;Acc:MGI:3697726]	11	+	97491643	97491666	97491133	97491230	97493050	97493082	1.57943e-06	0.000159879	0.476	0	0	0.97
Ap1b1	adaptor protein complex AP-1, beta 1 subunit [Source:MGI Symbol;Acc:MGI:1096368]	11	+	5033241	5033262	5032417	5032619	5033686	5033842	2.18492e-13	1.1957e-10	0.475	0	0	0.95
Shank3	SH3/ankyrin domain gene 3 [Source:MGI Symbol;Acc:MGI:1930016]	15	+	89538014	89538038	89533373	89533454	89543099	89543230	0.000298046	0.0164649	0.475	0	0	0.887
Mast2	microtubule associated serine/threonine kinase 2 [Source:MGI Symbol;Acc:MGI:894676]	4	-	116333412	116333433	116330390	116330469	116337421	116337497	8.09397e-09	1.46125e-06	0.471	0	0	0.981
Atp8a1	ATPase, aminophospholipid transporter (APLT), class I, type 8A, member 1 [Source:MGI Symbol;Acc:MGI:1330848]	5	-	67756649	67756694	67751012	67751085	67761113	67761202	1.78053e-06	0.000178175	0.471	0	0	0.953
Ubr4	ubiquitin protein ligase E3 component n-recognin 4 [Source:MGI Symbol;Acc:MGI:1916366]	4	+	139432481	139432514	139431544	139431761	139433619	139433683	7.91556e-12	3.22366e-09	0.469	0	0	0.906
Rab11fip3	RAB11 family interacting protein 3 (class II) [Source:MGI Symbol;Acc:MGI:2444431]	17	-	26011996	26012131	26008854	26008890	26013773	26013917	2.15043e-07	2.68031e-05	0.469	0	0	0.719
Wdr7	WD repeat domain 7 [Source:MGI Symbol;Acc:MGI:1860197]	18	+	63791795	63791891	63779868	63779957	63794224	63794343	6.32083e-08	9.2242e-06	0.467	0	0	0.972
Pdlim7	PDZ and LIM domain 7 [Source:MGI Symbol;Acc:MGI:1914649]	13	-	55507863	55507880	55507487	55507624	55508207	55508326	0	0	0.466	0	0	0.941
Unc13b	unc-13 homolog B (C. elegans) [Source:MGI Symbol;Acc:MGI:1342278]	4	+	43260992	43261049	43259461	43259609	43261681	43261774	9.32779e-10	2.30068e-07	0.465	0	0	0.973
Asap1	ArfGAP with SH3 domain, ankyrin repeat and PH domain1 [Source:MGI Symbol;Acc:MGI:1342335]	15	-	64153843	64153852	64152829	64152930	64158917	64159004	0.000544593	0.0276432	0.465	0	0	0.911
Ap2a1	adaptor-related protein complex 2, alpha 1 subunit [Source:MGI Symbol;Acc:MGI:101921]	7	-	44903461	44903527	44903143	44903200	44903740	44903901	1.81676e-09	4.00189e-07	0.464	0	0	0.777
Sorbs2	sorbin and SH3 domain containing 2 [Source:MGI Symbol;Acc:MGI:1924574]	8	+	45794977	45796558	45792780	45792968	45799709	45799798	0	0	0.463	0	0	0.984
Picalm	phosphatidylinositol binding clathrin assembly protein [Source:MGI Symbol;Acc:MGI:2385902]	7	+	90182218	90182368	90177499	90177603	90189149	90189257	0	0	0.463	0	0	0.882
Lrrfip1	leucine rich repeat (in FLII) interacting protein 1 [Source:MGI Symbol;Acc:MGI:1342770]	1	+	91093559	91093637	91068562	91068649	91100576	91100612	1.07307e-11	4.27084e-09	0.463	0	0	0.853
Snx21	sorting nexin family member 21 [Source:MGI Symbol;Acc:MGI:1917729]	2	+	164791557	164791568	164786697	164786855	164791712	164792487	2.28157e-09	4.84302e-07	0.463	0	0	0.948
Tenm3	teneurin transmembrane protein 3 [Source:MGI Symbol;Acc:MGI:1345183]	8	-	48287132	48287153	48278957	48279190	48287790	48288040	4.5972e-08	6.94019e-06	0.462	0	0	0.987
Afdn	afadin, adherens junction formation factor [Source:MGI Symbol;Acc:MGI:1314653]	17	+	13890962	13890998	13888529	13888977	13896087	13896222	1.11022e-16	9.48401e-14	0.461	0	0	0.914
Mtcl1	microtubule crosslinking factor 1 [Source:MGI Symbol;Acc:MGI:1915867]	17	-	66340483	66340540	66336985	66338154	66342825	66344365	1.15519e-10	3.58047e-08	0.461	0	0	0.92
Emc1	ER membrane protein complex subunit 1 [Source:MGI Symbol;Acc:MGI:2443696]	4	+	139364330	139364339	139363656	139363779	139365194	139365394	8.463e-07	9.12025e-05	0.459	0	0	0.959
Map6	microtubule-associated protein 6 [Source:MGI Symbol;Acc:MGI:1201690]	7	+	99317471	99317668	99315688	99315902	99335984	99337137	9.09644e-05	0.00592181	0.458	0	0	0.902
Lrrfip1	leucine rich repeat (in FLII) interacting protein 1 [Source:MGI Symbol;Acc:MGI:1342770]	1	+	91110354	91110447	91107297	91107390	91112155	91112297	6.46594e-13	3.18962e-10	0.454	0	0	0.97
Camk2d	calcium/calmodulin-dependent protein kinase II, delta [Source:MGI Symbol;Acc:MGI:1341265]	3	+	126808207	126808249	126801723	126801761	126810638	126810687	1.39189e-09	3.18625e-07	0.454	0	0	0.976
Ccdc85a	coiled-coil domain containing 85A [Source:MGI Symbol;Acc:MGI:2445069]	11	-	28392853	28392952	28388843	28388948	28396045	28396165	0.000460252	0.0239167	0.454	0	0	0.458
Dctn1	dynactin 1 [Source:MGI Symbol;Acc:MGI:107745]	6	+	83187763	83187784	83183298	83183333	83189076	83189268	0	0	0.452	0	0	0.985
Nfasc	neurofascin [Source:MGI Symbol;Acc:MGI:104753]	1	-	132607002	132607047	132605483	132605585	132608382	132608507	5.24025e-13	2.65992e-10	0.452	0	0	0.736
Neo1	neogenin [Source:MGI Symbol;Acc:MGI:1097159]	9	-	58902082	58902115	58899164	58899233	58902913	58903108	1.85786e-09	4.06687e-07	0.452	0	0	0.935
Atp2b1	ATPase, Ca++ transporting, plasma membrane 1 [Source:MGI Symbol;Acc:MGI:104653]	10	+	99019277	99019431	99018714	99018897	99022807	99023455	2.04267e-05	0.00155866	0.451	0	0	0.951
Fez2	fasciculation and elongation protein zeta 2 (zygin II) [Source:MGI Symbol;Acc:MGI:2675856]	17	-	78386990	78387071	78384743	78384819	78400629	78400898	0	0	0.449	0	0	0.816
Myo9a	myosin IXa [Source:MGI Symbol;Acc:MGI:107735]	9	+	59912536	59912590	59910583	59910707	59921722	59921925	9.34718e-07	9.95063e-05	0.449	0	0	0.855
Adam22	a disintegrin and metallopeptidase domain 22 [Source:MGI Symbol;Acc:MGI:1340046]	5	-	8095072	8095180	8092730	8092831	8111894	8111985	0.000136603	0.00839364	0.449	0	0	0.967
Lman2l	lectin, mannose-binding 2-like [Source:MGI Symbol;Acc:MGI:2443010]	1	-	36429422	36429455	36428299	36428461	36438749	36438832	1.07011e-08	1.88339e-06	0.444	0	0	0.978
Tpd52	tumor protein D52 [Source:MGI Symbol;Acc:MGI:107749]	3	-	8936438	8936480	8934991	8935040	8944610	8944712	3.45106e-06	0.000316952	0.444	0	0	0.978
Cask	calcium/calmodulin-dependent serine protein kinase (MAGUK family) [Source:MGI Symbol;Acc:MGI:1309489]	X	-	13596685	13596703	13586843	13586965	13600356	13600456	1.03695e-13	6.15561e-11	0.442	0	0	0.994
Slc37a4	solute carrier family 37 (glucose-6-phosphate transporter), member 4 [Source:MGI Symbol;Acc:MGI:1316650]	9	+	44401706	44401769	44401420	44401534	44402072	44402211	2.8233e-08	4.43423e-06	0.442	0	0	0.97
Exoc7	exocyst complex component 7 [Source:MGI Symbol;Acc:MGI:1859270]	11	-	116293274	116293313	116292571	116292584	116293971	116294038	1.19732e-07	1.6067e-05	0.442	0	0	0.941
Asap1	ArfGAP with SH3 domain, ankyrin repeat and PH domain1 [Source:MGI Symbol;Acc:MGI:1342335]	15	-	64153843	64153852	64152829	64152930	64158881	64159004	0.000549838	0.0278691	0.441	0	0	0.981
Fat1	FAT atypical cadherin 1 [Source:MGI Symbol;Acc:MGI:109168]	8	+	45047649	45047709	45045030	45045168	45049841	45049877	6.70319e-12	2.82859e-09	0.439	0	0	0.99
Dync1i2	dynein cytoplasmic 1 intermediate chain 2 [Source:MGI Symbol;Acc:MGI:107750]	2	+	71233648	71233708	71228599	71228690	71235914	71236030	1.11022e-16	9.48401e-14	0.438	0	0	0.993
Sh3glb2	SH3-domain GRB2-like endophilin B2 [Source:MGI Symbol;Acc:MGI:2385131]	2	-	30346058	30346073	30345698	30345939	30346352	30346453	2.7426e-08	4.32688e-06	0.438	0	0	0.798
Clta	clathrin, light polypeptide (Lca) [Source:MGI Symbol;Acc:MGI:894297]	4	+	44030214	44030268	44025448	44025560	44032400	44032846	0	0	0.437	0	0	0.954
Git1	G protein-coupled receptor kinase-interactor 1 [Source:MGI Symbol;Acc:MGI:1927140]	11	+	77502828	77502855	77501071	77501114	77503017	77503115	3.65051e-11	1.29147e-08	0.437	0	0	0.917
Slc38a10	solute carrier family 38, member 10 [Source:MGI Symbol;Acc:MGI:1919305]	11	-	120108466	120108490	120106433	120106610	120109431	120109536	0.000252156	0.0142214	0.437	0	0	0.948
Ank2	ankyrin 2, brain [Source:MGI Symbol;Acc:MGI:88025]	3	-	126941609	126947807	126940071	126940146	126950734	126950756	1.18239e-13	6.78884e-11	0.436	0	0	0.757
Pus7	pseudouridylate synthase 7 [Source:MGI Symbol;Acc:MGI:1925947]	5	-	23763333	23763351	23762362	23762474	23768767	23768912	1.19457e-10	3.67007e-08	0.435	0	0	0.955
Fry	FRY microtubule binding protein [Source:MGI Symbol;Acc:MGI:2443895]	5	+	150488960	150488978	150481492	150481576	150491077	150491188	1.93496e-05	0.00148945	0.434	0	0	0.82
Mical3	microtubule associated monooxygenase, calponin and LIM domain containing 3 [Source:MGI Symbol;Acc:MGI:2442733]	6	-	120969354	120969492	120962754	120962865	120973402	120973647	2.69004e-05	0.00200956	0.433	3.57692e-11	8.6131e-10	0.758
Sec24c	Sec24 related gene family, member C (S. cerevisiae) [Source:MGI Symbol;Acc:MGI:1919746]	14	+	20685211	20685280	20683884	20684021	20686508	20686620	1.19937e-11	4.66743e-09	0.432	0	0	0.929
Lrrfip1	leucine rich repeat (in FLII) interacting protein 1 [Source:MGI Symbol;Acc:MGI:1342770]	1	+	91108579	91108672	91107297	91107390	91112155	91112297	2.1983e-08	3.56449e-06	0.432	0	0	0.978
Apbb2	amyloid beta (A4) precursor protein-binding, family B, member 2 [Source:MGI Symbol;Acc:MGI:108405]	5	-	66392272	66392335	66391771	66391857	66400075	66400281	1.68996e-06	0.000170084	0.432	0	0	0.63
Mon2	MON2 homolog, regulator of endosome to Golgi trafficking [Source:MGI Symbol;Acc:MGI:1914324]	10	-	123009912	123009930	123009502	123009631	123010493	123010637	9.641e-06	0.000792644	0.432	0	0	0.814
Ergic3	ERGIC and golgi 3 [Source:MGI Symbol;Acc:MGI:1913616]	2	+	156015376	156015391	156011348	156011406	156015988	156016020	0	0	0.431	0	0	0.954
Gdpd5	glycerophosphodiester phosphodiesterase domain containing 5 [Source:MGI Symbol;Acc:MGI:2686926]	7	+	99456996	99457011	99456451	99456534	99458773	99458886	1.31384e-09	3.06774e-07	0.431	0	0	0.83
Abi2	abl-interactor 2 [Source:MGI Symbol;Acc:MGI:106913]	1	+	60450070	60450253	60448077	60448202	60453603	60453762	5.68321e-09	1.06586e-06	0.43	0	0	0.97
Zfyve27	zinc finger, FYVE domain containing 27 [Source:MGI Symbol;Acc:MGI:1919602]	19	+	42185619	42185640	42184117	42184189	42185804	42185949	1.66818e-07	2.12839e-05	0.43	0	0	0.939
Atp2c1	ATPase, Ca++-sequestering [Source:MGI Symbol;Acc:MGI:1889008]	9	-	105493542	105493554	105469106	105470147	105494414	105494597	7.26585e-10	1.84405e-07	0.428	0	0	0.783
Gapvd1	GTPase activating protein and VPS9 domains 1 [Source:MGI Symbol;Acc:MGI:1913941]	2	-	34722937	34723018	34720567	34720728	34725042	34725232	1.55542e-13	8.78663e-11	0.427	0	0	0.661
Epb41l1	erythrocyte membrane protein band 4.1 like 1 [Source:MGI Symbol;Acc:MGI:103010]	2	+	156511784	156511820	156510735	156510881	156514027	156514210	7.63265e-07	8.35394e-05	0.427	0	0	0.96
Epb41l3	erythrocyte membrane protein band 4.1 like 3 [Source:MGI Symbol;Acc:MGI:103008]	17	+	69273881	69273917	69270610	69270664	69274703	69274895	1.11022e-16	9.48401e-14	0.425	0	0	0.902
Camsap1	calmodulin regulated spectrin-associated protein 1 [Source:MGI Symbol;Acc:MGI:3036242]	2	-	25955259	25955292	25952677	25952819	25956246	25956327	8.03833e-05	0.00531197	0.425	0	0	0.959
Adgrl2	adhesion G protein-coupled receptor L2 [Source:MGI Symbol;Acc:MGI:2139714]	3	-	148860426	148860438	148858732	148859533	148865599	148865709	1.29649e-06	0.000133948	0.422	0	0	0.942
Eif4g3	eukaryotic translation initiation factor 4 gamma, 3 [Source:MGI Symbol;Acc:MGI:1923935]	4	+	138095908	138095929	138082892	138082988	138096751	138096931	1.90017e-05	0.00146869	0.422	0	0	0.871
Kifap3	kinesin-associated protein 3 [Source:MGI Symbol;Acc:MGI:107566]	1	+	163912071	163912137	163888205	163888305	163915724	163917109	1.76535e-07	2.23211e-05	0.421	0	0	0.698
Atp2b1	ATPase, Ca++ transporting, plasma membrane 1 [Source:MGI Symbol;Acc:MGI:104653]	10	+	99019277	99019364	99018714	99018897	99022807	99023569	1.10931e-06	0.000117025	0.419	0	0	0.922
Afap1	actin filament associated protein 1 [Source:MGI Symbol;Acc:MGI:1917542]	5	+	35987054	35987321	35984187	35984306	35989553	35989668	1.77493e-08	2.97441e-06	0.418	0	0	0.919
Pum2	pumilio RNA-binding family member 2 [Source:MGI Symbol;Acc:MGI:1931751]	12	+	8700148	8700222	8699063	8699188	8705932	8706041	2.43782e-05	0.00184013	0.418	9.46104e-11	2.22847e-09	0.689
Plekha5	pleckstrin homology domain containing, family A member 5 [Source:MGI Symbol;Acc:MGI:1923802]	6	+	140537005	140537023	140536647	140536763	140543719	140544187	0.000492243	0.0254282	0.418	0	0	0.695
Myo18a	myosin XVIIIA [Source:MGI Symbol;Acc:MGI:2667185]	11	+	77815855	77815999	77777292	77778314	77817618	77817706	0	0	0.417	0	0	0.895
Ppfibp1	PTPRF interacting protein, binding protein 1 (liprin beta 1) [Source:MGI Symbol;Acc:MGI:1914783]	6	+	146996808	146996901	146996389	146996482	146998166	146998281	5.44009e-15	3.73596e-12	0.417	0	0	0.939
Mars	methionine-tRNA synthetase [Source:MGI Symbol;Acc:MGI:1345633]	10	-	127296716	127296740	127296540	127296633	127296872	127296944	4.44057e-07	5.14988e-05	0.416	0	0	0.854
Sft2d1	SFT2 domain containing 1 [Source:MGI Symbol;Acc:MGI:1918689]	17	+	8317849	8317871	8311138	8311285	8318843	8318930	7.58934e-05	0.00504382	0.414	0	0	0.907
Trim9	tripartite motif-containing 9 [Source:MGI Symbol;Acc:MGI:2137354]	12	-	70267233	70267263	70255037	70255226	70268061	70268200	4.07504e-05	0.00287171	0.413	3.77043e-12	9.47152e-11	0.786
Slain1	SLAIN motif family, member 1 [Source:MGI Symbol;Acc:MGI:2145578]	14	+	103684233	103684383	103656932	103657072	103685668	103685818	0.000361959	0.0195939	0.413	0	0	0.902
Cstf2	cleavage stimulation factor, 3' pre-RNA subunit 2 [Source:MGI Symbol;Acc:MGI:1343054]	X	+	134072414	134072474	134069844	134069907	134073213	134073277	2.64834e-05	0.0019862	0.412	0	0	0.87
Atp6v0a1	ATPase, H+ transporting, lysosomal V0 subunit A1 [Source:MGI Symbol;Acc:MGI:103286]	11	+	101049458	101049476	101048417	101048525	101055025	101055143	4.14303e-11	1.4226e-08	0.41	0	0	0.956
Ptprk	protein tyrosine phosphatase, receptor type, K [Source:MGI Symbol;Acc:MGI:103310]	10	+	28570173	28570191	28569896	28569973	28573367	28573404	6.57345e-05	0.00442747	0.41	0	0	0.718
Nckap1	NCK-associated protein 1 [Source:MGI Symbol;Acc:MGI:1355333]	2	-	80571212	80571230	80570118	80570229	80580857	80581380	0	0	0.409	0	0	0.65
Dip2a	disco interacting protein 2 homolog A [Source:MGI Symbol;Acc:MGI:2385920]	10	-	76271375	76271405	76270395	76270457	76272532	76272703	3.8568e-10	1.05532e-07	0.408	0	0	0.702
Epha5	Eph receptor A5 [Source:MGI Symbol;Acc:MGI:99654]	5	-	84117560	84117626	84107988	84108056	84142277	84142383	0.000423456	0.022269	0.408	0	0	0.676
Rpn2	ribophorin II [Source:MGI Symbol;Acc:MGI:98085]	2	+	157323222	157323270	157321742	157321872	157325710	157325735	3.33067e-15	2.38068e-12	0.407	0	0	0.959
Nsmf	NMDA receptor synaptonuclear signaling and neuronal migration factor [Source:MGI Symbol;Acc:MGI:1861755]	2	+	25057964	25057970	25057100	25057176	25058252	25058321	2.3619e-09	4.98333e-07	0.407	0	0	0.776
Madd	MAP-kinase activating death domain [Source:MGI Symbol;Acc:MGI:2444672]	2	-	91140808	91140817	91140556	91140626	91142755	91142862	4.45027e-06	0.000396607	0.405	0	0	0.629
Vps13d	vacuolar protein sorting 13D [Source:MGI Symbol;Acc:MGI:2448530]	4	-	145103613	145103688	145099964	145100070	145105798	145105921	0.000121636	0.00760744	0.405	0	0	0.839
Mef2a	myocyte enhancer factor 2A [Source:MGI Symbol;Acc:MGI:99532]	7	-	67244520	67244544	67240313	67240440	67251656	67251742	5.37622e-08	7.94501e-06	0.404	0	0	0.937
Atp11b	ATPase, class VI, type 11B [Source:MGI Symbol;Acc:MGI:1923545]	3	+	35843570	35843696	35838720	35839214	35849433	35849564	2.47492e-06	0.000238136	0.403	0	0	0.932
Slmap	sarcolemma associated protein [Source:MGI Symbol;Acc:MGI:1933549]	14	-	26429787	26429910	26428241	26428316	26438678	26438738	3.93868e-07	4.66042e-05	0.402	0	0	0.796
Camk2g	calcium/calmodulin-dependent protein kinase II gamma [Source:MGI Symbol;Acc:MGI:88259]	14	-	20747818	20747851	20745791	20745860	20755658	20755702	4.04121e-14	2.44033e-11	0.4	0	0	0.929
Mink1	misshapen-like kinase 1 (zebrafish) [Source:MGI Symbol;Acc:MGI:1355329]	11	+	70609407	70609431	70609165	70609254	70609553	70609717	8.03691e-09	1.45847e-06	0.398	0	0	0.834
Ptprf	protein tyrosine phosphatase, receptor type, F [Source:MGI Symbol;Acc:MGI:102695]	4	-	118218011	118218044	118217091	118217189	118220492	118220608	2.57905e-13	1.36861e-10	0.397	0	0	0.865
Dlg1	discs, large homolog 1 (Drosophila) [Source:MGI Symbol;Acc:MGI:107231]	16	+	31854652	31854688	31853842	31853884	31856440	31856491	1.02989e-09	2.52186e-07	0.396	0	0	0.971
Nfasc	neurofascin [Source:MGI Symbol;Acc:MGI:104753]	1	-	132588073	132588310	132576285	132576417	132595483	132595657	1.11022e-16	9.48401e-14	0.393	0	0	0.993
Nrxn2	neurexin II [Source:MGI Symbol;Acc:MGI:1096362]	19	+	6463823	6463847	6454978	6455280	6472257	6472419	2.7837e-11	1.00511e-08	0.393	0.0184031	0.198127	0.516
Sipa1l2	signal-induced proliferation-associated 1 like 2 [Source:MGI Symbol;Acc:MGI:2676970]	8	-	125423192	125423246	125422578	125422702	125433177	125433309	1.12895e-10	3.53039e-08	0.393	0	0	0.952
Dock3	dedicator of cyto-kinesis 3 [Source:MGI Symbol;Acc:MGI:2429763]	9	-	106941497	106941524	106941282	106941378	106943906	106943992	8.26588e-08	1.17685e-05	0.393	0	0	0.751
Vav2	vav 2 oncogene [Source:MGI Symbol;Acc:MGI:102718]	2	-	27300429	27300444	27299373	27299472	27302007	27302110	0.000628545	0.0311374	0.393	0	0	0.967
Ptprf	protein tyrosine phosphatase, receptor type, F [Source:MGI Symbol;Acc:MGI:102695]	4	-	118252075	118252093	118248898	118249009	118257488	118257677	2.22045e-15	1.62019e-12	0.39	0	0	0.85
Mink1	misshapen-like kinase 1 (zebrafish) [Source:MGI Symbol;Acc:MGI:1355329]	11	+	70606630	70606717	70605949	70606164	70606919	70607079	1.09018e-10	3.43986e-08	0.389	0	0	0.786
Cpeb4	cytoplasmic polyadenylation element binding protein 4 [Source:MGI Symbol;Acc:MGI:1914829]	11	+	31918800	31918824	31908824	31908875	31920408	31920582	3.51841e-05	0.00252518	0.388	0	0	0.933
Ptprd	protein tyrosine phosphatase, receptor type, D [Source:MGI Symbol;Acc:MGI:97812]	4	-	76138555	76138573	76136810	76136921	76140513	76140702	0.00026369	0.0147768	0.388	0	0	0.845
Arhgef7	Rho guanine nucleotide exchange factor (GEF7) [Source:MGI Symbol;Acc:MGI:1860493]	8	+	11824504	11824681	11821959	11822049	11831492	11831592	1.77468e-09	3.93394e-07	0.385	0	0	0.922
Camk2d	calcium/calmodulin-dependent protein kinase II, delta [Source:MGI Symbol;Acc:MGI:1341265]	3	+	126805856	126805916	126801723	126801761	126810638	126810687	1.37915e-08	2.35626e-06	0.385	0	0	0.981
Pxk	PX domain containing serine/threonine kinase [Source:MGI Symbol;Acc:MGI:1289230]	14	+	8159998	8160031	8155282	8155345	8163934	8165111	1.31655e-07	1.74151e-05	0.383	0	0	0.968
Arhgef11	Rho guanine nucleotide exchange factor (GEF) 11 [Source:MGI Symbol;Acc:MGI:2441869]	3	+	87695397	87695517	87688778	87688850	87697344	87697390	9.79667e-07	0.000103975	0.383	0	0	0.749
Faim	Fas apoptotic inhibitory molecule [Source:MGI Symbol;Acc:MGI:1344387]	9	+	98990914	98990971	98986373	98986512	98992100	98992233	8.19349e-09	1.47164e-06	0.381	0	0	0.997
Synj1	synaptojanin 1 [Source:MGI Symbol;Acc:MGI:1354961]	16	-	90971563	90971587	90969182	90969374	90973909	90974066	2.30779e-05	0.00174952	0.381	0	0	0.942
R3hdm1	R3H domain containing 1 [Source:MGI Symbol;Acc:MGI:2448514]	1	+	128162768	128162858	128153188	128153399	128167892	128168007	3.17405e-08	4.94079e-06	0.38	0	0	0.725
Ralgapa1	Ral GTPase activating protein, alpha subunit 1 [Source:MGI Symbol;Acc:MGI:1931050]	12	-	55735033	55735174	55722773	55722941	55738210	55738372	3.08288e-05	0.00224014	0.38	0	0	0.941
Kif1a	kinesin family member 1A [Source:MGI Symbol;Acc:MGI:108391]	1	-	93026831	93026855	93025620	93025735	93036845	93036951	3.43189e-09	6.98829e-07	0.379	0	0	0.707
Hs6st2	heparan sulfate 6-O-sulfotransferase 2 [Source:MGI Symbol;Acc:MGI:1354959]	X	-	51428657	51428744	51387211	51390361	51679889	51680408	9.01245e-05	0.00588903	0.379	1	1	-0.083
Cltb	clathrin, light polypeptide (Lcb) [Source:MGI Symbol;Acc:MGI:1921575]	13	-	54597025	54597079	54593584	54594042	54598721	54598833	0	0	0.377	0	0	0.801
Fryl	FRY like transcription coactivator [Source:MGI Symbol;Acc:MGI:1919563]	5	-	73024770	73024788	73023887	73023998	73027315	73027384	4.46894e-07	5.16568e-05	0.377	0	0	0.952
Ssr1	signal sequence receptor, alpha [Source:MGI Symbol;Acc:MGI:105082]	13	-	37983094	37983109	37979742	37979806	37983392	37983486	0	0	0.376	0	0	0.965
Sidt2	SID1 transmembrane family, member 2 [Source:MGI Symbol;Acc:MGI:2446134]	9	-	45947540	45947552	45946983	45947055	45947835	45947888	7.43849e-15	5.01011e-12	0.375	0	0	0.809
Pam	peptidylglycine alpha-amidating monooxygenase [Source:MGI Symbol;Acc:MGI:97475]	1	-	97864202	97864520	97853102	97853232	97884125	97884197	8.33149e-09	1.48879e-06	0.375	0	0	0.679
Nav1	neuron navigator 1 [Source:MGI Symbol;Acc:MGI:2183683]	1	-	135463914	135463938	135463721	135463799	135464705	135464758	5.15182e-06	0.000451093	0.375	5.0115e-09	1.06503e-07	0.84
Oxr1	oxidation resistance 1 [Source:MGI Symbol;Acc:MGI:2179326]	15	+	41848669	41848750	41825889	41826052	41850458	41850584	9.40279e-05	0.00609739	0.375	0	0	0.78
Med24	mediator complex subunit 24 [Source:MGI Symbol;Acc:MGI:1344385]	11	-	98717708	98717765	98716413	98716525	98717909	98718142	2.68319e-12	1.18957e-09	0.374	0	0	0.828
Atp9b	ATPase, class II, type 9B [Source:MGI Symbol;Acc:MGI:1354757]	18	-	80736811	80736844	80734140	80736149	80738652	80738856	4.14028e-08	6.30475e-06	0.374	0	0	0.849
Gripap1	GRIP1 associated protein 1 [Source:MGI Symbol;Acc:MGI:1859616]	X	+	7803593	7803686	7803322	7803400	7804359	7804494	3.08678e-08	4.82641e-06	0.373	0	0	0.936
Eef1d	eukaryotic translation elongation factor 1 delta (guanine nucleotide exchange protein) [Source:MGI Symbol;Acc:MGI:1913906]	15	-	75902678	75903818	75901131	75901255	75909244	75909340	0	0	0.371	0	0	0.767
Dnajc13	DnaJ heat shock protein family (Hsp40) member C13 [Source:MGI Symbol;Acc:MGI:2676368]	9	-	104153267	104153376	104152095	104152423	104156813	104156913	2.18003e-12	9.78891e-10	0.371	0	0	0.836
Slc25a25	solute carrier family 25 (mitochondrial carrier, phosphate carrier), member 25 [Source:MGI Symbol;Acc:MGI:1915913]	2	-	32420655	32420691	32420304	32420416	32421302	32421390	4.78886e-11	1.61274e-08	0.371	0	0	0.582
Nup54	nucleoporin 54 [Source:MGI Symbol;Acc:MGI:1920460]	5	-	92434221	92434383	92431038	92431122	92435003	92435123	7.25105e-06	0.000611954	0.371	0	0	0.899
Vav2	vav 2 oncogene [Source:MGI Symbol;Acc:MGI:102718]	2	-	27284838	27284853	27283308	27283418	27285632	27285765	3.03454e-05	0.00221883	0.371	0	0	0.977
Gopc	golgi associated PDZ and coiled-coil motif containing [Source:MGI Symbol;Acc:MGI:2149946]	10	-	52357341	52357365	52354571	52354747	52358772	52358937	5.31437e-08	7.88689e-06	0.369	0	0	0.698
Mycbp2	MYC binding protein 2 [Source:MGI Symbol;Acc:MGI:2179432]	14	-	103177255	103177330	103174765	103174990	103182353	103182494	0.000118182	0.00744465	0.368	0	0	0.853
Kalrn	kalirin, RhoGEF kinase [Source:MGI Symbol;Acc:MGI:2685385]	16	-	34049829	34049922	34039878	34040009	34053559	34053664	0.00018393	0.0109186	0.368	0	0	0.751
Eif4g3	eukaryotic translation initiation factor 4 gamma, 3 [Source:MGI Symbol;Acc:MGI:1923935]	4	+	138095908	138095929	138087532	138087565	138096751	138096931	1.38141e-07	1.79861e-05	0.367	0	0	0.972
Kif1a	kinesin family member 1A [Source:MGI Symbol;Acc:MGI:108391]	1	-	93065551	93065578	93064148	93064282	93066046	93066189	0	0	0.366	0	0	0.594
Myo9a	myosin IXa [Source:MGI Symbol;Acc:MGI:107735]	9	+	59790035	59790092	59788414	59788514	59801913	59802011	1.28612e-05	0.0010379	0.366	0.00163366	0.0210979	0.414
Fnbp1l	formin binding protein 1-like [Source:MGI Symbol;Acc:MGI:1925642]	3	-	122556411	122556570	122549155	122549265	122557902	122558106	8.16159e-11	2.62309e-08	0.363	0	0	0.801
Tnik	TRAF2 and NCK interacting kinase [Source:MGI Symbol;Acc:MGI:1916264]	3	+	28625198	28625222	28623010	28623108	28630430	28630615	1.16824e-06	0.000121775	0.361	0	0	0.922
Asap2	ArfGAP with SH3 domain, ankyrin repeat and PH domain 2 [Source:MGI Symbol;Acc:MGI:2685438]	12	+	21214361	21214370	21213138	21213225	21217974	21218078	0.000409146	0.0216138	0.361	0	0	1
Myo18a	myosin XVIIIA [Source:MGI Symbol;Acc:MGI:2667185]	11	+	77815855	77815891	77777315	77778314	77817618	77817706	1.90049e-08	3.15464e-06	0.36	0	0	0.912
Mff	mitochondrial fission factor [Source:MGI Symbol;Acc:MGI:1922984]	1	+	82741817	82741976	82735469	82735507	82750519	82750604	1.34212e-06	0.000137445	0.359	0	0	0.699
Fry	FRY microtubule binding protein [Source:MGI Symbol;Acc:MGI:2443895]	5	+	150461388	150461397	150457744	150457915	150466243	150466441	5.22632e-09	9.89441e-07	0.358	9.12782e-11	2.15166e-09	0.748
Cers6	ceramide synthase 6 [Source:MGI Symbol;Acc:MGI:2442564]	2	+	69105742	69105766	69105002	69105159	69108441	69108644	1.7062e-05	0.00133687	0.358	0	0	0.904
Enah	enabled homolog (Drosophila) [Source:MGI Symbol;Acc:MGI:108360]	1	-	181931173	181931185	181930677	181930762	181956393	181956571	0	0	0.357	0	0	0.905
Rtn4	reticulon 4 [Source:MGI Symbol;Acc:MGI:1915835]	11	+	29705534	29705591	29692946	29693693	29733632	29733840	2.06151e-08	3.38979e-06	0.357	0	0	0.698
Pip5k1c	phosphatidylinositol-4-phosphate 5-kinase, type 1 gamma [Source:MGI Symbol;Acc:MGI:1298224]	10	+	81315878	81315956	81314991	81315118	81317765	81319973	0.000794859	0.0379797	0.357	0	0	0.857
Rapgef1	Rap guanine nucleotide exchange factor (GEF) 1 [Source:MGI Symbol;Acc:MGI:104580]	2	+	29710155	29710308	29707197	29707400	29722223	29722309	2.19931e-06	0.000213375	0.356	0	0	0.964
Syngap1	synaptic Ras GTPase activating protein 1 homolog (rat) [Source:MGI Symbol;Acc:MGI:3039785]	17	+	26961068	26961110	26960342	26960521	26961435	26962498	8.87272e-05	0.00580856	0.356	0	0	0.717
Frmd4a	FERM domain containing 4A [Source:MGI Symbol;Acc:MGI:1919850]	2	+	4607998	4608070	4605969	4606066	4610966	4614043	0.000137483	0.00840519	0.356	0	0	0.862
R3hdm2	R3H domain containing 2 [Source:MGI Symbol;Acc:MGI:1919000]	10	+	127481692	127481755	127476519	127476698	127483975	127484218	3.7616e-09	7.57163e-07	0.354	0	0	0.753
Mapk8ip3	mitogen-activated protein kinase 8 interacting protein 3 [Source:MGI Symbol;Acc:MGI:1353598]	17	-	24908410	24908428	24907328	24907386	24909149	24909161	1.04229e-06	0.000110288	0.354	0	0	0.873
Ddhd1	DDHD domain containing 1 [Source:MGI Symbol;Acc:MGI:2150302]	14	-	45628853	45628874	45620711	45620840	45629579	45629753	8.88031e-06	0.000737024	0.354	0	0	0.897
Cyld	CYLD lysine 63 deubiquitinase [Source:MGI Symbol;Acc:MGI:1921506]	8	+	88718289	88718298	88709890	88709996	88719297	88719396	6.82002e-07	7.559e-05	0.351	0	0	0.464
Tenm4	teneurin transmembrane protein 4 [Source:MGI Symbol;Acc:MGI:2447063]	7	+	96805104	96805131	96797319	96797505	96811832	96811979	0.000236846	0.0135102	0.351	1	1	0.655
Srcin1	SRC kinase signaling inhibitor 1 [Source:MGI Symbol;Acc:MGI:1933179]	11	-	97542533	97542557	97537043	97537239	97551676	97551978	3.17014e-05	0.00229403	0.35	2.76987e-09	5.94076e-08	0.638
Ogdh	oxoglutarate (alpha-ketoglutarate) dehydrogenase (lipoamide) [Source:MGI Symbol;Acc:MGI:1098267]	11	+	6324877	6324922	6316764	6316855	6334532	6334648	0.000519764	0.0266689	0.35	0	0	0.751
Itsn1	intersectin 1 (SH3 domain protein 1A) [Source:MGI Symbol;Acc:MGI:1338069]	16	+	91842627	91842642	91841488	91841610	91848721	91848969	1.12421e-12	5.32086e-10	0.349	0	0	0.797
Clasp1	CLIP associating protein 1 [Source:MGI Symbol;Acc:MGI:1923957]	1	+	118523320	118523347	118521826	118521934	118525296	118525455	2.13288e-06	0.000208084	0.349	0	0	0.967
Col4a3bp	collagen, type IV, alpha 3 (Goodpasture antigen) binding protein [Source:MGI Symbol;Acc:MGI:1915268]	13	+	96616993	96617071	96616456	96616549	96624694	96624790	6.75708e-06	0.000577651	0.349	0	0	0.659
St7	suppression of tumorigenicity 7 [Source:MGI Symbol;Acc:MGI:1927450]	6	+	17850356	17850425	17848003	17848079	17852257	17852412	4.79171e-05	0.00332326	0.349	0	0	0.706
Tpd52	tumor protein D52 [Source:MGI Symbol;Acc:MGI:107749]	3	-	8943550	8943577	8934991	8935040	8944610	8944712	6.65715e-10	1.72711e-07	0.348	0	0	0.952
Sbf2	SET binding factor 2 [Source:MGI Symbol;Acc:MGI:1921831]	7	-	110341289	110341364	110339889	110340074	110348854	110348995	4.01883e-07	4.72334e-05	0.348	0	0	0.963
Tbc1d9b	TBC1 domain family, member 9B [Source:MGI Symbol;Acc:MGI:1924045]	11	+	50164161	50164212	50163824	50163896	50168168	50168225	2.83023e-05	0.00208686	0.348	0	0	0.77
Smap1	small ArfGAP 1 [Source:MGI Symbol;Acc:MGI:2138261]	1	-	23871437	23871518	23866216	23866297	23876373	23876449	0	0	0.347	0	0	0.87
Homer1	homer scaffolding protein 1 [Source:MGI Symbol;Acc:MGI:1347345]	13	+	93386344	93386380	93355939	93356079	93387523	93387680	2.08775e-08	3.41688e-06	0.344	0	0	0.894
Tenm4	teneurin transmembrane protein 4 [Source:MGI Symbol;Acc:MGI:2447063]	7	+	96854716	96854737	96852332	96852582	96863449	96863682	2.33567e-05	0.00176683	0.344	1	1	0.5
Fbxo16	F-box protein 16 [Source:MGI Symbol;Acc:MGI:1354706]	14	+	65320104	65320140	65303099	65303202	65321233	65323973	0.000164909	0.00995823	0.344	0	0	0.789
Anxa7	annexin A7 [Source:MGI Symbol;Acc:MGI:88031]	14	-	20467457	20467523	20464843	20464946	20467870	20467935	6.49155e-09	1.19663e-06	0.343	0	0	0.832
Vav2	vav 2 oncogene [Source:MGI Symbol;Acc:MGI:102718]	2	-	27268150	27268237	27267229	27267384	27268898	27269022	3.45693e-06	0.000316952	0.343	0	0	0.95
Atg16l1	autophagy related 16-like 1 (S. cerevisiae) [Source:MGI Symbol;Acc:MGI:1924290]	1	+	87775080	87775128	87774812	87774869	87775756	87775859	0.000113626	0.00719643	0.343	0	0	0.705
Erc2	ELKS/RAB6-interacting/CAST family member 2 [Source:MGI Symbol;Acc:MGI:1098749]	14	+	28046474	28046486	28040342	28040536	28080131	28080267	0.000275364	0.0153573	0.343	0	0	0.927
Ank2	ankyrin 2, brain [Source:MGI Symbol;Acc:MGI:88025]	3	-	126979255	126979267	126976844	126976932	126981799	126981944	6.8669e-07	7.58695e-05	0.342	4.78506e-14	1.31818e-12	0.37
Lrch2	leucine-rich repeats and calponin homology (CH) domain containing 2 [Source:MGI Symbol;Acc:MGI:2147870]	X	-	147498287	147498365	147496766	147496832	147503383	147503470	0.000710662	0.0347144	0.339	0	0	0.895
Ripor2	RHO family interacting cell polarization regulator 2 [Source:MGI Symbol;Acc:MGI:2444879]	13	+	24696470	24696596	24695572	24695702	24701061	24701730	0.000181447	0.0108262	0.338	0	0	0.609
Clip1	CAP-GLY domain containing linker protein 1 [Source:MGI Symbol;Acc:MGI:1928401]	5	-	123581591	123581597	123579999	123580124	123582719	123582769	8.41831e-08	1.18888e-05	0.337	0	0	0.915
Meaf6	MYST/Esa1-associated factor 6 [Source:MGI Symbol;Acc:MGI:1917338]	4	+	125107516	125107546	125102838	125103031	125108322	125108356	3.77143e-08	5.76814e-06	0.335	0	0	0.934
Epb41l3	erythrocyte membrane protein band 4.1 like 3 [Source:MGI Symbol;Acc:MGI:103008]	17	+	69283884	69284007	69274703	69274895	69284538	69284916	1.16872e-08	2.03648e-06	0.334	0	0	0.663
Bin1	bridging integrator 1 [Source:MGI Symbol;Acc:MGI:108092]	18	+	32426223	32426352	32424819	32424967	32431670	32431742	7.64999e-08	1.10261e-05	0.333	0.000192168	0.00284302	0.153
Fchsd2	FCH and double SH3 domains 2 [Source:MGI Symbol;Acc:MGI:2448475]	7	+	101246301	101246373	101244120	101244216	101250444	101250561	1.59399e-10	4.77163e-08	0.33	0	0	0.729
Rapgef1	Rap guanine nucleotide exchange factor (GEF) 1 [Source:MGI Symbol;Acc:MGI:104580]	2	+	29719592	29719850	29707197	29707400	29722223	29722309	5.52048e-08	8.12391e-06	0.33	0	0	0.952
Clasp1	CLIP associating protein 1 [Source:MGI Symbol;Acc:MGI:1923957]	1	+	118565142	118565259	118561010	118561117	118570848	118570999	1.10915e-07	1.50569e-05	0.33	0	0	0.614
Kif21b	kinesin family member 21B [Source:MGI Symbol;Acc:MGI:109234]	1	+	136173471	136173651	136172802	136173002	136174036	136177998	4.3016e-05	0.00300717	0.33	0	0	0.827
Tnrc6a	trinucleotide repeat containing 6a [Source:MGI Symbol;Acc:MGI:2385292]	7	+	123180248	123180395	123179716	123179859	123180539	123180677	5.33906e-13	2.67136e-10	0.329	0	0	0.848
Nrxn1	neurexin I [Source:MGI Symbol;Acc:MGI:1096391]	17	-	90991366	90991378	90704065	90704367	90992114	90992144	0.000129207	0.00796715	0.328	0.0100442	0.113684	0.37
Cnnm3	cyclin M3 [Source:MGI Symbol;Acc:MGI:2151055]	1	+	36524033	36524132	36521700	36521839	36525165	36528237	2.04195e-05	0.00155866	0.327	0	0	0.345
Aak1	AP2 associated kinase 1 [Source:MGI Symbol;Acc:MGI:1098687]	6	+	86970990	86971086	86967268	86967373	86995839	86996218	0.000100916	0.0064616	0.326	0	0	0.813
Rtn3	reticulon 3 [Source:MGI Symbol;Acc:MGI:1339970]	19	-	7456299	7458423	7434930	7435138	7467810	7467867	0.00100066	0.0460541	0.326	6.87636e-08	1.35908e-06	0.618
Kdm1a	lysine (K)-specific demethylase 1A [Source:MGI Symbol;Acc:MGI:1196256]	4	-	136563437	136563449	136561017	136561160	136568572	136568667	1.08802e-14	7.05681e-12	0.324	0	0	0.805
Kitl	kit ligand [Source:MGI Symbol;Acc:MGI:96974]	10	+	100080856	100080940	100079973	100080130	100087346	100087456	0.000488255	0.0252594	0.322	0	0	0.378
Exoc7	exocyst complex component 7 [Source:MGI Symbol;Acc:MGI:1859270]	11	-	116297570	116297663	116295543	116295689	116300265	116300433	1.03558e-07	1.42236e-05	0.321	0	0	0.887
Src	Rous sarcoma oncogene [Source:MGI Symbol;Acc:MGI:98397]	2	+	157458842	157458860	157458533	157458633	157462709	157462808	5.38169e-05	0.0037104	0.321	0	0	0.935
Socs7	suppressor of cytokine signaling 7 [Source:MGI Symbol;Acc:MGI:2651588]	11	+	97376996	97377098	97376436	97376541	97377935	97378066	0.000358983	0.019493	0.321	0	0	0.725
Meaf6	MYST/Esa1-associated factor 6 [Source:MGI Symbol;Acc:MGI:1917338]	4	+	125107651	125107709	125102838	125103031	125108322	125108356	0.000397547	0.0211928	0.318	0	0	0.524
Gyg	glycogenin [Source:MGI Symbol;Acc:MGI:1351614]	3	-	20123121	20123172	20122146	20122864	20125257	20125477	0	0	0.317	0	0	0.771
R3hdm2	R3H domain containing 2 [Source:MGI Symbol;Acc:MGI:1919000]	10	+	127481692	127481794	127476519	127476698	127483975	127484218	0.000221405	0.0128174	0.316	0	0	0.677
Map2	microtubule-associated protein 2 [Source:MGI Symbol;Acc:MGI:97175]	1	+	66416731	66416866	66401443	66401521	66420134	66420196	8.5858e-08	1.20767e-05	0.315	0	0	0.545
Apba2	amyloid beta (A4) precursor protein-binding, family A, member 2 [Source:MGI Symbol;Acc:MGI:1261791]	7	+	64734654	64734690	64733512	64733658	64736880	64736967	8.16345e-11	2.62309e-08	0.314	0	0	0.926
Dpf2	D4, zinc and double PHD fingers family 2 [Source:MGI Symbol;Acc:MGI:109529]	19	-	5903730	5903772	5902630	5902768	5904239	5904318	1.39009e-09	3.18625e-07	0.314	0	0	0.928
Dctn4	dynactin 4 [Source:MGI Symbol;Acc:MGI:1914915]	18	+	60545356	60545377	60544038	60544146	60545747	60545821	4.89741e-06	0.000433149	0.314	0	0	0.653
Tacc2	transforming, acidic coiled-coil containing protein 2 [Source:MGI Symbol;Acc:MGI:1928899]	7	+	130743543	130743684	130742129	130742301	130751189	130751333	2.25827e-09	4.83107e-07	0.313	0	0	0.65
Map4k4	mitogen-activated protein kinase kinase kinase kinase 4 [Source:MGI Symbol;Acc:MGI:1349394]	1	+	40001429	40001591	40000623	40000749	40003756	40003987	2.26605e-07	2.8144e-05	0.312	0	0	0.716
Syt7	synaptotagmin VII [Source:MGI Symbol;Acc:MGI:1859545]	19	+	10430337	10430460	10417962	10418042	10435549	10435685	0.000600907	0.030066	0.312	1	1	0.815
Thoc5	THO complex 5 [Source:MGI Symbol;Acc:MGI:1351333]	11	+	4911434	4911470	4910626	4910759	4912780	4912858	9.35605e-08	1.29781e-05	0.311	0	0	0.704
Mff	mitochondrial fission factor [Source:MGI Symbol;Acc:MGI:1922984]	1	+	82741817	82741976	82735469	82735507	82747082	82747142	8.84872e-07	9.47761e-05	0.309	0	0	0.69
Clasp1	CLIP associating protein 1 [Source:MGI Symbol;Acc:MGI:1923957]	1	+	118512704	118512728	118510205	118510376	118521826	118521934	2.62592e-05	0.00197361	0.309	0	0	0.759
Pbrm1	polybromo 1 [Source:MGI Symbol;Acc:MGI:1923998]	14	+	31023066	31023179	31022719	31022859	31025497	31025650	0.00057263	0.0288572	0.309	0	0	0.853
Snx14	sorting nexin 14 [Source:MGI Symbol;Acc:MGI:2155664]	9	-	88400722	88400749	88398238	88398371	88401919	88401978	1.17985e-07	1.59388e-05	0.307	0	0	0.83
Anks1b	ankyrin repeat and sterile alpha motif domain containing 1B [Source:MGI Symbol;Acc:MGI:1924781]	10	+	90914692	90914767	90897246	90897426	90921295	90921424	0.000178524	0.0106883	0.307	1.06297e-09	2.34475e-08	0.576
Kif3a	kinesin family member 3A [Source:MGI Symbol;Acc:MGI:107689]	11	+	53588688	53588760	53586834	53586930	53593373	53593530	1.78067e-07	2.24339e-05	0.306	0	0	0.801
Trim9	tripartite motif-containing 9 [Source:MGI Symbol;Acc:MGI:2137354]	12	-	70267233	70267266	70255037	70255226	70268061	70268200	0.000623625	0.0309375	0.306	4.17568e-10	9.45945e-09	0.702
Nf1	neurofibromin 1 [Source:MGI Symbol;Acc:MGI:97306]	11	+	79414240	79414270	79412683	79412758	79418551	79418683	2.84421e-06	0.000270257	0.305	1.0085e-11	2.50016e-10	0.645
Bak1	BCL2-antagonist/killer 1 [Source:MGI Symbol;Acc:MGI:1097161]	17	-	27021662	27021682	27021166	27021347	27022438	27022582	9.09131e-08	1.26858e-05	0.302	0	0	0.991
Cacnb1	calcium channel, voltage-dependent, beta 1 subunit [Source:MGI Symbol;Acc:MGI:102522]	11	-	98010626	98010646	98010295	98010376	98011865	98011942	1.87213e-06	0.000186277	0.302	0	0	0.89
Lrrfip2	leucine rich repeat (in FLII) interacting protein 2 [Source:MGI Symbol;Acc:MGI:1918518]	9	+	111213812	111213914	111205754	111205847	111214140	111214273	3.90601e-07	4.63743e-05	0.301	0	0	0.795
Fnbp1	formin binding protein 1 [Source:MGI Symbol;Acc:MGI:109606]	2	-	31044881	31044896	31040404	31040514	31052984	31053080	2.05157e-06	0.000201837	0.301	0	0	0.878
Synj1	synaptojanin 1 [Source:MGI Symbol;Acc:MGI:1354961]	16	-	90949698	90949737	90946791	90946862	90950350	90950485	9.87971e-06	0.000808475	0.3	0	0	0.838
Tenm3	teneurin transmembrane protein 3 [Source:MGI Symbol;Acc:MGI:1345183]	8	-	48313237	48313264	48310622	48310769	48335588	48335774	3.84758e-06	0.000349113	0.299	0	0	0.92
Magi3	membrane associated guanylate kinase, WW and PDZ domain containing 3 [Source:MGI Symbol;Acc:MGI:1923484]	3	-	104016601	104016692	104013258	104016068	104017500	104017639	7.54222e-06	0.000634997	0.299	0	0	0.478
Magi2	membrane associated guanylate kinase, WW and PDZ domain containing 2 [Source:MGI Symbol;Acc:MGI:1354953]	5	+	20661263	20661352	20651054	20651193	20702069	20702903	0.000810179	0.0386064	0.299	0	0	0.797
Cstf2	cleavage stimulation factor, 3' pre-RNA subunit 2 [Source:MGI Symbol;Acc:MGI:1343054]	X	+	134072414	134072474	134069844	134069907	134073135	134073277	1.62818e-08	2.7416e-06	0.298	0	0	0.934
Madd	MAP-kinase activating death domain [Source:MGI Symbol;Acc:MGI:2444672]	2	-	91155012	91155075	91154644	91154765	91155545	91155648	6.34869e-05	0.0043009	0.298	0	0	0.862
Dbn1	drebrin 1 [Source:MGI Symbol;Acc:MGI:1931838]	13	-	55476635	55476773	55476145	55476316	55477550	55477680	0	0	0.297	0	0	0.426
Clip2	CAP-GLY domain containing linker protein 2 [Source:MGI Symbol;Acc:MGI:1313136]	5	-	134504733	134504838	134502525	134503461	134510162	134510223	1.97073e-05	0.00151366	0.295	0	0	0.741
Add3	adducin 3 (gamma) [Source:MGI Symbol;Acc:MGI:1351615]	19	+	53244309	53244405	53242503	53242627	53244997	53247399	2.01505e-12	9.16562e-10	0.294	0	0	0.914
Ank3	ankyrin 3, epithelial [Source:MGI Symbol;Acc:MGI:88026]	10	+	69986082	69988632	69982115	69982197	69994371	69994446	2.99013e-06	0.000281522	0.292	9.6212e-09	2.00657e-07	0.656
Adgrl2	adhesion G protein-coupled receptor L2 [Source:MGI Symbol;Acc:MGI:2139714]	3	-	148849765	148849804	148846848	148847032	148850835	148851021	3.40451e-05	0.00244845	0.292	0	0	0.77
Dclk2	doublecortin-like kinase 2 [Source:MGI Symbol;Acc:MGI:1918012]	3	-	86830823	86830871	86824635	86824730	86831732	86831834	5.60147e-11	1.86844e-08	0.29	0	0	0.745
Ints10	integrator complex subunit 10 [Source:MGI Symbol;Acc:MGI:1918135]	8	+	68825051	68825129	68822156	68822250	68827276	68827501	0.000398804	0.0212275	0.289	0	0	0.895
Carmil1	capping protein regulator and myosin 1 linker 1 [Source:MGI Symbol;Acc:MGI:1915982]	13	-	24049642	24049660	24045015	24045082	24064576	24064726	0.000209928	0.0122542	0.288	0	0	0.653
Nfasc	neurofascin [Source:MGI Symbol;Acc:MGI:104753]	1	-	132593350	132593365	132576285	132576417	132595483	132595657	9.58132e-06	0.000789591	0.285	0	0	0.871
Ppfia1	protein tyrosine phosphatase, receptor type, f polypeptide (PTPRF), interacting protein (liprin), alpha 1 [Source:MGI Symbol;Acc:MGI:1924750]	7	-	144502866	144502896	144500251	144500403	144504902	144505134	0.00104626	0.0480266	0.283	0	0	0.983
Sorbs1	sorbin and SH3 domain containing 1 [Source:MGI Symbol;Acc:MGI:700014]	19	-	40340044	40340146	40336985	40337035	40344355	40344439	0.000796296	0.0379966	0.282	0	0	0.761
Add1	adducin 1 (alpha) [Source:MGI Symbol;Acc:MGI:87918]	5	+	34629135	34629172	34628414	34628513	34630469	34632308	3.44604e-07	4.10524e-05	0.281	0	0	0.795
Evi5l	ecotropic viral integration site 5 like [Source:MGI Symbol;Acc:MGI:2442167]	8	+	4201933	4201966	4200867	4200921	4202935	4203076	2.94815e-07	3.53617e-05	0.279	0	0	0.887
Tpd52l2	tumor protein D52-like 2 [Source:MGI Symbol;Acc:MGI:1913564]	2	+	181510503	181510530	181508165	181508267	181511573	181511615	2.97622e-05	0.00218343	0.279	0	0	0.715
Actn4	actinin alpha 4 [Source:MGI Symbol;Acc:MGI:1890773]	7	-	28895120	28895180	28894500	28894659	28895431	28895512	1.0568e-07	1.4402e-05	0.278	0	0	0.922
Bpnt1	bisphosphate 3'-nucleotidase 1 [Source:MGI Symbol;Acc:MGI:1338800]	1	+	185349836	185349881	185348743	185348835	185352181	185352379	2.84733e-06	0.000270257	0.278	0	0	0.744
Cnnm2	cyclin M2 [Source:MGI Symbol;Acc:MGI:2151054]	19	+	46871655	46871721	46868537	46868631	46877207	46877392	4.15314e-06	0.000372974	0.278	3.30911e-05	0.000529107	0.257
Col4a1	collagen, type IV, alpha 1 [Source:MGI Symbol;Acc:MGI:88454]	8	-	11204535	11204552	11202893	11203008	11206225	11206403	2.5272e-09	5.30015e-07	0.277	0	0	0.904
Dvl1	dishevelled segment polarity protein 1 [Source:MGI Symbol;Acc:MGI:94941]	4	+	155857495	155857534	155856613	155856820	155857992	155859303	3.10994e-06	0.000291236	0.277	0	0	0.739
Pclo	piccolo (presynaptic cytomatrix protein) [Source:MGI Symbol;Acc:MGI:1349390]	5	+	14778538	14778565	14775319	14775444	14788397	14788491	0.000208543	0.0121937	0.277	7.74451e-10	1.72341e-08	0.919
Bin1	bridging integrator 1 [Source:MGI Symbol;Acc:MGI:108092]	18	+	32426223	32426352	32424819	32424967	32431982	32432093	0.000286883	0.0158984	0.276	0	0	0.334
Acsl6	acyl-CoA synthetase long-chain family member 6 [Source:MGI Symbol;Acc:MGI:894291]	11	+	54336935	54337013	54335051	54335125	54338411	54338546	0.000741739	0.0358822	0.276	0.00326942	0.0402491	0.425
Cacna2d3	calcium channel, voltage-dependent, alpha2/delta subunit 3 [Source:MGI Symbol;Acc:MGI:1338890]	14	-	29124665	29124683	29104953	29105025	29170503	29170637	0.00039272	0.0210315	0.275	0	0	0.847
R3hdm2	R3H domain containing 2 [Source:MGI Symbol;Acc:MGI:1919000]	10	+	127465130	127465184	127464981	127465013	127471767	127472000	1.05582e-13	6.16319e-11	0.274	0	0	0.556
Phldb1	pleckstrin homology like domain, family B, member 1 [Source:MGI Symbol;Acc:MGI:2143230]	9	-	44708393	44708522	44707884	44708040	44710922	44711060	1.74741e-10	5.18654e-08	0.274	0	0	0.918
Pcnx	pecanex homolog (Drosophila) [Source:MGI Symbol;Acc:MGI:1891924]	12	+	81933530	81933715	81917664	81919380	81946930	81947021	0.000591875	0.0296564	0.273	7.63867e-12	1.90498e-10	0.576
Ppfibp1	PTPRF interacting protein, binding protein 1 (liprin beta 1) [Source:MGI Symbol;Acc:MGI:1914783]	6	+	146999661	146999694	146998166	146998281	147000940	147001002	0.000868046	0.0408086	0.273	0.0191082	0.204842	0.192
Cadm1	cell adhesion molecule 1 [Source:MGI Symbol;Acc:MGI:1889272]	9	+	47836716	47836770	47829376	47829409	47848166	47848298	1.53811e-11	5.79257e-09	0.271	0	0	0.571
Ank3	ankyrin 3, epithelial [Source:MGI Symbol;Acc:MGI:88026]	10	+	69986088	69993762	69982115	69982197	69994371	69994446	3.22152e-06	0.000298494	0.268	1.43364e-09	3.13265e-08	0.691
Kif3a	kinesin family member 3A [Source:MGI Symbol;Acc:MGI:107689]	11	+	53590716	53590725	53586834	53586930	53593373	53593530	4.23781e-07	4.96405e-05	0.267	0	0	0.84
Clasp2	CLIP associating protein 2 [Source:MGI Symbol;Acc:MGI:1923749]	9	+	113858580	113858604	113854172	113854346	113860119	113860137	1.85239e-05	0.00143536	0.267	0	0	0.635
Depdc5	DEP domain containing 5 [Source:MGI Symbol;Acc:MGI:2141101]	5	+	32959280	32959346	32955852	32955958	32964631	32964783	3.59247e-05	0.00256258	0.267	0	0	0.814
Osbpl8	oxysterol binding protein-like 8 [Source:MGI Symbol;Acc:MGI:2443807]	10	+	111224671	111224708	111204734	111204840	111233552	111233690	1.84769e-06	0.000184369	0.266	1.62093e-14	4.52721e-13	0.631
Arvcf	armadillo repeat gene deleted in velocardiofacial syndrome [Source:MGI Symbol;Acc:MGI:109620]	16	+	18400780	18400798	18400084	18400253	18401566	18401638	1.29473e-08	2.22287e-06	0.264	0	0	0.916
H13	histocompatibility 13 [Source:MGI Symbol;Acc:MGI:95886]	2	+	152703994	152704194	152700182	152700268	152704621	152705036	0.000371103	0.020027	0.264	0	0	0.713
Ptpro	protein tyrosine phosphatase, receptor type, O [Source:MGI Symbol;Acc:MGI:1097152]	6	+	137420323	137420407	137418208	137418277	137426764	137426800	0.000950825	0.0442253	0.259	1	1	0.451
Arhgap21	Rho GTPase activating protein 21 [Source:MGI Symbol;Acc:MGI:1918685]	2	-	20853957	20854232	20853037	20853069	20854934	20855040	1.54718e-07	1.99957e-05	0.257	0	0	0.606
Chchd3	coiled-coil-helix-coiled-coil-helix domain containing 3 [Source:MGI Symbol;Acc:MGI:1913325]	6	-	32893391	32893406	32892291	32892375	32968200	32968318	1.24879e-08	2.15455e-06	0.255	0	0	0.959
Mbnl2	muscleblind like splicing factor 2 [Source:MGI Symbol;Acc:MGI:2145597]	14	+	120395711	120395765	120388899	120389163	120396450	120396604	6.67274e-05	0.00447713	0.255	0	0	0.8
Scrib	scribbled planar cell polarity [Source:MGI Symbol;Acc:MGI:2145950]	15	-	76047921	76047996	76047620	76047672	76048114	76048152	0.000149308	0.00906302	0.255	0	0	0.863
Fmnl2	formin-like 2 [Source:MGI Symbol;Acc:MGI:1918659]	2	+	53128716	53128842	53126852	53126976	53131839	53132203	3.6454e-08	5.59985e-06	0.254	0	0	0.849
Dlg1	discs, large homolog 1 (Drosophila) [Source:MGI Symbol;Acc:MGI:107231]	16	+	31854667	31854688	31853842	31853884	31856440	31856491	1.75447e-09	3.91391e-07	0.253	0	0	0.955
Macf1	microtubule-actin crosslinking factor 1 [Source:MGI Symbol;Acc:MGI:108559]	4	-	123364056	123364074	123360909	123361027	123365272	123365347	6.81183e-10	1.75425e-07	0.252	0	0	0.574
Ppp3ca	protein phosphatase 3, catalytic subunit, alpha isoform [Source:MGI Symbol;Acc:MGI:107164]	3	+	136932010	136932040	136928521	136928619	136935028	136935779	3.75544e-06	0.000341638	0.244	0	0	0.692
Map4k4	mitogen-activated protein kinase kinase kinase kinase 4 [Source:MGI Symbol;Acc:MGI:1349394]	1	+	40001429	40001591	40000623	40000749	40004806	40004913	2.57896e-07	3.15824e-05	0.242	0	0	0.935
Ablim1	actin-binding LIM protein 1 [Source:MGI Symbol;Acc:MGI:1194500]	19	-	57051129	57051234	57049461	57049509	57061252	57061382	0.000367418	0.0198587	0.238	0	0	0.695
Clasp2	CLIP associating protein 2 [Source:MGI Symbol;Acc:MGI:1923749]	9	+	113860119	113860137	113854172	113854346	113862185	113862287	0.000436818	0.0228686	0.236	0	0	0.717
Nrcam	neuronal cell adhesion molecule [Source:MGI Symbol;Acc:MGI:104750]	12	+	44584834	44584987	44576603	44576780	44590107	44590239	0.000707749	0.0346204	0.235	0	0	0.806
Bptf	bromodomain PHD finger transcription factor [Source:MGI Symbol;Acc:MGI:2444008]	11	-	107044491	107044665	107043632	107043825	107046999	107047343	0.000307018	0.0169072	0.232	0	0	0.593
Wnk2	WNK lysine deficient protein kinase 2 [Source:MGI Symbol;Acc:MGI:1922857]	13	-	49050483	49050582	49044373	49044418	49051356	49051527	0.000927054	0.0432796	0.232	2.83822e-06	5.03647e-05	0.591
Clip1	CAP-GLY domain containing linker protein 1 [Source:MGI Symbol;Acc:MGI:1928401]	5	-	123586333	123586354	123583520	123583638	123590792	123590845	1.48033e-05	0.00117567	0.231	0	0	0.455
Ppp6r3	protein phosphatase 6, regulatory subunit 3 [Source:MGI Symbol;Acc:MGI:1921807]	19	-	3459746	3459764	3459360	3459480	3464544	3464695	2.64976e-07	3.2224e-05	0.23	0	0	0.742
Ptprs	protein tyrosine phosphatase, receptor type, S [Source:MGI Symbol;Acc:MGI:97815]	17	-	56427790	56427817	56426386	56426504	56427938	56428132	5.69084e-09	1.06586e-06	0.229	0	0	0.969
Sorbs1	sorbin and SH3 domain containing 1 [Source:MGI Symbol;Acc:MGI:700014]	19	-	40340044	40340146	40336985	40337035	40349898	40350013	1.61349e-12	7.53477e-10	0.227	0	0	0.851
Epb41l1	erythrocyte membrane protein band 4.1 like 1 [Source:MGI Symbol;Acc:MGI:103010]	2	+	156524880	156525288	156514027	156514210	156526888	156526993	1.05702e-09	2.55318e-07	0.225	0	0	0.544
Kif21a	kinesin family member 21A [Source:MGI Symbol;Acc:MGI:109188]	15	-	90964974	90964995	90959687	90959748	90965466	90965632	0.000222725	0.0128613	0.223	0	0	0.282
Psap	prosaposin [Source:MGI Symbol;Acc:MGI:97783]	10	+	60297536	60297545	60295945	60296002	60299097	60299229	8.59812e-12	3.46139e-09	0.222	0	0	0.827
Tcf20	transcription factor 20 [Source:MGI Symbol;Acc:MGI:108399]	15	-	82814480	82814603	82808628	82809787	82815610	82815660	0.000568571	0.028694	0.221	0	0	0.682
Cask	calcium/calmodulin-dependent serine protein kinase (MAGUK family) [Source:MGI Symbol;Acc:MGI:1309489]	X	-	13552372	13552441	13550946	13550982	13554877	13554946	0.000530157	0.0270673	0.22	0	0	0.731
Kcnab2	potassium voltage-gated channel, shaker-related subfamily, beta member 2 [Source:MGI Symbol;Acc:MGI:109239]	4	-	152434781	152434823	152412816	152412860	152435804	152435937	9.41837e-05	0.00609739	0.219	5.77316e-15	1.6459e-13	0.706
Micu1	mitochondrial calcium uptake 1 [Source:MGI Symbol;Acc:MGI:2384909]	10	+	59767083	59767089	59750503	59750547	59768137	59768252	2.50991e-08	3.99578e-06	0.218	0	0	0.717
Sh3glb1	SH3-domain GRB2-like B1 (endophilin) [Source:MGI Symbol;Acc:MGI:1859730]	3	-	144699853	144699877	144697377	144697467	144705512	144705605	6.14045e-08	8.99845e-06	0.218	0	0	0.959
Nrxn1	neurexin I [Source:MGI Symbol;Acc:MGI:1096391]	17	-	90701987	90702011	90700743	90700905	90704065	90704367	9.44553e-05	0.0061037	0.218	1.32045e-11	3.25748e-10	0.392
Sptan1	spectrin alpha, non-erythrocytic 1 [Source:MGI Symbol;Acc:MGI:98386]	2	+	30001099	30001159	29999913	30000062	30002230	30002429	4.7485e-06	0.00042211	0.217	0	0	0.416
Slit2	slit homolog 2 (Drosophila) [Source:MGI Symbol;Acc:MGI:1315205]	5	+	48263640	48263667	48259543	48259683	48275581	48275675	7.22382e-11	2.36455e-08	0.216	2.22045e-16	6.73038e-15	0.465
Smarcc2	SWI/SNF related, matrix associated, actin dependent regulator of chromatin, subfamily c, member 2 [Source:MGI Symbol;Acc:MGI:1915344]	10	+	128481681	128481774	128480850	128481004	128482082	128482202	5.06613e-06	0.000444702	0.216	0	0	0.626
Taf1	TATA-box binding protein associated factor 1 [Source:MGI Symbol;Acc:MGI:1336878]	X	+	101590733	101590739	101590472	101590589	101593939	101594065	0.000712046	0.0347231	0.216	0	0	0.632
Pbx1	pre B cell leukemia homeobox 1 [Source:MGI Symbol;Acc:MGI:97495]	1	-	168184955	168185068	168183529	168183619	168191277	168191437	4.0298e-06	0.000363762	0.211	0	0	0.701
Stim1	stromal interaction molecule 1 [Source:MGI Symbol;Acc:MGI:107476]	7	+	102433196	102433233	102430884	102430951	102435383	102435900	0.000391045	0.0209739	0.209	0	0	0.515
Srcap	Snf2-related CREBBP activator protein [Source:MGI Symbol;Acc:MGI:2444036]	7	+	127540250	127540433	127539756	127539921	127540655	127540922	0.000182775	0.0108869	0.208	0	0	0.83
Slc22a23	solute carrier family 22, member 23 [Source:MGI Symbol;Acc:MGI:1920352]	13	-	34193248	34193272	34192155	34192279	34193393	34193426	4.73783e-09	9.08346e-07	0.205	0	0	0.347
Agrn	agrin [Source:MGI Symbol;Acc:MGI:87961]	4	-	156169545	156169557	156169219	156169336	156169769	156169881	0.000245061	0.0138659	0.205	0	0	0.691
Nt5c3	5'-nucleotidase, cytosolic III [Source:MGI Symbol;Acc:MGI:1927186]	6	-	56897774	56897829	56892789	56892888	56923671	56923819	0.000345511	0.0188492	0.205	9.35604e-09	1.95262e-07	0.321
Spag9	sperm associated antigen 9 [Source:MGI Symbol;Acc:MGI:1918084]	11	+	94079198	94079210	94071564	94071686	94081339	94081397	1.69206e-07	2.1472e-05	0.204	0	0	0.447
Dnm1l	dynamin 1-like [Source:MGI Symbol;Acc:MGI:1921256]	16	-	16318444	16318477	16316601	16316778	16319451	16319508	8.65297e-05	0.00567531	0.204	0	0	0.523
Clta	clathrin, light polypeptide (Lca) [Source:MGI Symbol;Acc:MGI:894297]	4	+	44031399	44031435	44025448	44025560	44032400	44032846	3.33067e-16	2.71287e-13	0.203	0	0	0.896
Sorbs1	sorbin and SH3 domain containing 1 [Source:MGI Symbol;Acc:MGI:700014]	19	-	40382755	40382782	40382520	40382633	40393387	40393516	5.2224e-07	5.88133e-05	0.203	0	0	0.553
Cdc42bpa	CDC42 binding protein kinase alpha [Source:MGI Symbol;Acc:MGI:2441841]	1	+	180123923	180123962	180117666	180117743	180134296	180134380	4.42144e-06	0.000395042	0.202	0	0	0.333
Nrxn2	neurexin II [Source:MGI Symbol;Acc:MGI:1096362]	19	+	6463823	6463868	6454978	6455280	6472257	6472419	5.4779e-10	1.44254e-07	0.2	0.003007	0.0372271	0.487
Wnk1	WNK lysine deficient protein kinase 1 [Source:MGI Symbol;Acc:MGI:2442092]	6	-	119929825	119929867	119927124	119927234	119934255	119934450	1.24888e-09	2.93563e-07	0.196	0	0	0.881
Ift20	intraflagellar transport 20 [Source:MGI Symbol;Acc:MGI:1915585]	11	+	78538509	78538738	78536444	78536576	78538833	78538962	1.316e-06	0.000135166	0.196	0	0	0.299
Slc4a7	solute carrier family 4, sodium bicarbonate cotransporter, member 7 [Source:MGI Symbol;Acc:MGI:2443878]	14	+	14793949	14794057	14791066	14791164	14796076	14796574	0.00105838	0.0483927	0.196	5.78495e-06	9.98407e-05	0.273
Lcorl	ligand dependent nuclear receptor corepressor-like [Source:MGI Symbol;Acc:MGI:2651932]	5	-	45775391	45775521	45747055	45747307	45795292	45795358	0.000638527	0.0315872	0.195	1	1	0.066
Dnm1l	dynamin 1-like [Source:MGI Symbol;Acc:MGI:1921256]	16	-	16342696	16342735	16341421	16341468	16345997	16346145	1.36022e-09	3.15498e-07	0.194	0	0	0.456
Fhl1	four and a half LIM domains 1 [Source:MGI Symbol;Acc:MGI:1298387]	X	+	56791238	56791438	56790463	56790650	56791843	56793338	2.29448e-07	2.83964e-05	0.193	0	0	0.645
Magi1	membrane associated guanylate kinase, WW and PDZ domain containing 1 [Source:MGI Symbol;Acc:MGI:1203522]	6	-	93694007	93694208	93686781	93686875	93697193	93697487	0.000715219	0.0347915	0.192	0	0	0.57
Sorbs1	sorbin and SH3 domain containing 1 [Source:MGI Symbol;Acc:MGI:700014]	19	-	40325470	40326937	40324746	40324832	40327449	40327622	0	0	0.191	0	0	0.691
Fam92a	family with sequence similarity 92, member A [Source:MGI Symbol;Acc:MGI:1915349]	4	-	12169957	12169978	12168964	12169033	12170983	12171168	6.32971e-12	2.70356e-09	0.188	0	0	0.301
Oscp1	organic solute carrier partner 1 [Source:MGI Symbol;Acc:MGI:1916308]	4	+	126064949	126064979	126058603	126058792	126073804	126073959	1.29881e-07	1.72964e-05	0.188	0	0	0.365
Adgrl2	adhesion G protein-coupled receptor L2 [Source:MGI Symbol;Acc:MGI:2139714]	3	-	148827540	148827585	148826364	148826533	148828476	148828568	0.000137201	0.00840519	0.186	0	0	0.378
Camk2g	calcium/calmodulin-dependent protein kinase II gamma [Source:MGI Symbol;Acc:MGI:88259]	14	-	20757665	20757728	20755658	20755702	20760143	20760186	2.90597e-09	5.98698e-07	0.185	0	0	0.349
Banp	BTG3 associated nuclear protein [Source:MGI Symbol;Acc:MGI:1889023]	8	+	121989954	121990071	121978554	121978754	121991527	121991703	0.000587623	0.0294855	0.185	1	1	0.268
Edem3	ER degradation enhancer, mannosidase alpha-like 3 [Source:MGI Symbol;Acc:MGI:1914217]	1	+	151812753	151812768	151811518	151811704	151818309	151818979	2.65434e-06	0.000254004	0.182	4.2401e-08	8.51401e-07	0.213
Mprip	myosin phosphatase Rho interacting protein [Source:MGI Symbol;Acc:MGI:1349438]	11	+	59757523	59761327	59754992	59755109	59764379	59764527	0.000255715	0.0143909	0.181	0	0	0.342
Cldnd1	claudin domain containing 1 [Source:MGI Symbol;Acc:MGI:2447860]	16	+	58729172	58729223	58727924	58728084	58729437	58729747	2.42265e-10	7.01246e-08	0.178	0	0	0.452
Cpeb2	cytoplasmic polyadenylation element binding protein 2 [Source:MGI Symbol;Acc:MGI:2442640]	5	+	43268868	43268892	43261733	43261784	43277430	43277601	0.000988604	0.0456839	0.177	9.97391e-08	1.9471e-06	0.367
Snap91	synaptosomal-associated protein 91 [Source:MGI Symbol;Acc:MGI:109132]	9	-	86798829	86798844	86798537	86798699	86804454	86804567	0.000403173	0.0213627	0.176	1.2044e-06	2.20187e-05	0.69
Kif21b	kinesin family member 21B [Source:MGI Symbol;Acc:MGI:109234]	1	+	136167161	136167200	136165017	136165131	136169186	136169323	0.000405456	0.0214512	0.175	0	0	0.69
Brsk2	BR serine/threonine kinase 2 [Source:MGI Symbol;Acc:MGI:1923020]	7	+	141987421	141987453	141985885	141986032	141987750	141987915	1.14991e-05	0.000932275	0.172	7.3909e-07	1.36858e-05	0.495
Arhgef11	Rho guanine nucleotide exchange factor (GEF) 11 [Source:MGI Symbol;Acc:MGI:2441869]	3	+	87681859	87681892	87618760	87618792	87683485	87683577	0.000609226	0.0303954	0.172	1.44662e-13	3.86533e-12	0.331
Edem3	ER degradation enhancer, mannosidase alpha-like 3 [Source:MGI Symbol;Acc:MGI:1914217]	1	+	151812753	151812801	151811518	151811704	151818309	151818935	0.000191462	0.0112891	0.169	1.44787e-05	0.000239621	0.169
Nrxn1	neurexin I [Source:MGI Symbol;Acc:MGI:1096391]	17	-	90561801	90561828	90560740	90560860	90565304	90565478	0.0002229	0.0128613	0.165	0	0	0.367
Cers5	ceramide synthase 5 [Source:MGI Symbol;Acc:MGI:1919199]	15	-	99737546	99737653	99734880	99736436	99738664	99738821	0.000120008	0.00753254	0.163	0	0	0.833
Ewsr1	Ewing sarcoma breakpoint region 1 [Source:MGI Symbol;Acc:MGI:99960]	11	-	5091459	5091477	5087959	5088146	5091858	5091982	1.84691e-08	3.08029e-06	0.159	0	0	0.532
Mff	mitochondrial fission factor [Source:MGI Symbol;Acc:MGI:1922984]	1	+	82745523	82745556	82735418	82735507	82747082	82747142	0.000314398	0.0172865	0.159	0	0	0.569
Snap91	synaptosomal-associated protein 91 [Source:MGI Symbol;Acc:MGI:109132]	9	-	86790055	86790139	86783299	86783434	86791484	86791568	1.92048e-06	0.000190546	0.157	0	0	0.796
Atp5c1	ATP synthase, H+ transporting, mitochondrial F1 complex, gamma polypeptide 1 [Source:MGI Symbol;Acc:MGI:1261437]	2	-	10056769	10056806	10056029	10056161	10058995	10059092	2.81671e-05	0.00208127	0.153	0	0	0.514
Fat1	FAT atypical cadherin 1 [Source:MGI Symbol;Acc:MGI:109168]	8	+	45012018	45012087	45010400	45010611	45012963	45013103	7.92541e-06	0.000665658	0.152	0	0	0.952
Rnf14	ring finger protein 14 [Source:MGI Symbol;Acc:MGI:1929668]	18	+	38301655	38301807	38300428	38300590	38307864	38308395	0.00039333	0.021032	0.148	0	0	0.218
Cldnd1	claudin domain containing 1 [Source:MGI Symbol;Acc:MGI:2447860]	16	+	58729157	58729223	58728047	58728084	58729437	58729747	7.83672e-08	1.12489e-05	0.146	0	0	0.438
Cldnd1	claudin domain containing 1 [Source:MGI Symbol;Acc:MGI:2447860]	16	+	58729179	58729223	58728038	58728084	58729437	58729747	3.98153e-07	4.69525e-05	0.142	0	0	0.436
Clasp1	CLIP associating protein 1 [Source:MGI Symbol;Acc:MGI:1923957]	1	+	118531977	118532085	118525296	118525455	118539265	118539369	0.0010913	0.0495741	0.138	0	0	0.372
Sh3glb1	SH3-domain GRB2-like B1 (endophilin) [Source:MGI Symbol;Acc:MGI:1859730]	3	-	144701759	144701846	144697377	144697467	144705512	144705605	6.70217e-07	7.45196e-05	0.135	0	0	0.945
Adcyap1r1	adenylate cyclase activating polypeptide 1 receptor 1 [Source:MGI Symbol;Acc:MGI:108449]	6	+	55491226	55491310	55484941	55485033	55494076	55494206	7.00168e-05	0.00467099	0.129	0	0	0.863
Mark3	MAP/microtubule affinity regulating kinase 3 [Source:MGI Symbol;Acc:MGI:1341865]	12	+	111646689	111646848	111639936	111640040	111647470	111647728	7.36784e-08	1.06633e-05	0.128	0	0	0.289
Immt	inner membrane protein, mitochondrial [Source:MGI Symbol;Acc:MGI:1923864]	6	+	71866725	71866740	71863140	71863270	71868579	71868803	0.000214196	0.0124618	0.123	0	0	0.421
Add1	adducin 1 (alpha) [Source:MGI Symbol;Acc:MGI:87918]	5	+	34629138	34629172	34628414	34628513	34630469	34630816	0.000473162	0.0245148	0.113	0	0	0.71
Eif4a2	eukaryotic translation initiation factor 4A2 [Source:MGI Symbol;Acc:MGI:106906]	16	+	23109119	23109259	23108718	23108851	23109984	23110153	2.80756e-05	0.0020789	0.106	1	1	0.039
Nptn	neuroplastin [Source:MGI Symbol;Acc:MGI:108077]	9	+	58618662	58619010	58582239	58582526	58623686	58623855	2.9374e-05	0.00216133	0.096	0	0	0.221
Srsf9	serine/arginine-rich splicing factor 9 [Source:MGI Symbol;Acc:MGI:104896]	5	+	115328346	115328704	115327394	115327499	115330497	115330658	1.12977e-06	0.000118826	0.095	0	0	0.48
Cttn	cortactin [Source:MGI Symbol;Acc:MGI:99695]	7	-	144452026	144452137	144449559	144449615	144452547	144452587	0.000536929	0.0273732	-0.088	0.159563	1	-0.074
Palm	paralemmin [Source:MGI Symbol;Acc:MGI:1261814]	10	+	79816791	79816923	79815184	79815241	79819040	79820896	0.000357562	0.019446	-0.113	0	0	-0.432
Ddr1	discoidin domain receptor family, member 1 [Source:MGI Symbol;Acc:MGI:99216]	17	-	35686480	35686591	35685305	35685550	35687144	35687310	0.000909599	0.0425906	-0.121	0	0	-0.747
Gripap1	GRIP1 associated protein 1 [Source:MGI Symbol;Acc:MGI:1859616]	X	+	7794259	7794286	7792275	7792337	7794991	7795099	0.00108863	0.049517	-0.122	4.66877e-05	0.000736379	-0.145
Ubl4a	ubiquitin-like 4A [Source:MGI Symbol;Acc:MGI:95049]	X	-	74368152	74368258	74367700	74367909	74368415	74368673	9.75637e-06	0.000800251	-0.125	6.09351e-06	0.000104807	-0.134
Dync1li2	dynein, cytoplasmic 1 light intermediate chain 2 [Source:MGI Symbol;Acc:MGI:107738]	8	-	104423585	104423627	104423112	104423230	104425438	104425498	0.000332275	0.0181554	-0.126	0	0	-0.285
Dusp11	dual specificity phosphatase 11 (RNA/RNP complex 1-interacting) [Source:MGI Symbol;Acc:MGI:1919352]	6	-	85950513	85950560	85950017	85950093	85952304	85952365	0.000117541	0.0074176	-0.129	1.10813e-08	2.29841e-07	-0.33
Tecr	trans-2,3-enoyl-CoA reductase [Source:MGI Symbol;Acc:MGI:1915408]	8	-	83573410	83573455	83573219	83573323	83574477	83574528	3.173e-06	0.000296189	-0.134	0.769967	1	-0.07
Supt5	suppressor of Ty 5 [Source:MGI Symbol;Acc:MGI:1202400]	7	-	28330017	28330029	28329582	28329652	28330579	28330645	4.96552e-06	0.000436966	-0.137	0	0	-0.258
Nkain4	Na+/K+ transporting ATPase interacting 4 [Source:MGI Symbol;Acc:MGI:1915372]	2	-	180935942	180936027	180934771	180935029	180937150	180937211	6.60127e-06	0.000568066	-0.14	0	0	-0.891
Lmtk3	lemur tyrosine kinase 3 [Source:MGI Symbol;Acc:MGI:3039582]	7	+	45787645	45787754	45787393	45787470	45787903	45788022	0.00032172	0.0176337	-0.14	0	0	-0.625
Kidins220	kinase D-interacting substrate 220 [Source:MGI Symbol;Acc:MGI:1924730]	12	+	25047893	25047926	25038323	25038550	25051094	25051364	0.00100405	0.0461495	-0.14	0	0	-0.682
Macf1	microtubule-actin crosslinking factor 1 [Source:MGI Symbol;Acc:MGI:108559]	4	-	123386548	123386557	123385454	123385686	123387227	123387431	2.58071e-05	0.0019438	-0.144	0	0	-0.288
Ubap2l	ubiquitin-associated protein 2-like [Source:MGI Symbol;Acc:MGI:1921633]	3	-	90031295	90031370	90028324	90028377	90034064	90034177	0.000812133	0.0386469	-0.147	8.46605e-10	1.87569e-08	-0.246
Pdlim7	PDZ and LIM domain 7 [Source:MGI Symbol;Acc:MGI:1914649]	13	-	55508207	55508326	55507863	55507880	55508779	55508810	0.00030319	0.0167227	-0.15	0	0	-0.23
Ppil2	peptidylprolyl isomerase (cyclophilin)-like 2 [Source:MGI Symbol;Acc:MGI:2447857]	16	-	17109644	17109694	17107178	17107224	17111142	17111215	0.00093509	0.0435513	-0.152	3.74135e-06	6.55062e-05	-0.129
Ablim1	actin-binding LIM protein 1 [Source:MGI Symbol;Acc:MGI:1194500]	19	-	57046924	57047065	57044880	57044972	57049461	57049509	0.000418959	0.0220656	-0.158	0	0	-0.191
Dnajc5	DnaJ heat shock protein family (Hsp40) member C5 [Source:MGI Symbol;Acc:MGI:892995]	2	+	181548925	181549000	181548669	181548841	181549272	181552249	7.52832e-10	1.89692e-07	-0.162	0	0	-0.248
Cacul1	CDK2 associated, cullin domain 1 [Source:MGI Symbol;Acc:MGI:1926082]	19	-	60537413	60537503	60534135	60534274	60543009	60543112	0.000215011	0.0124885	-0.169	1.45006e-09	3.16624e-08	-0.285
Pigq	phosphatidylinositol glycan anchor biosynthesis, class Q [Source:MGI Symbol;Acc:MGI:1333114]	17	-	25931461	25931673	25930957	25931038	25934757	25934801	0.000673907	0.0331037	-0.169	1.42696e-09	3.12031e-08	-0.199
4833439L19Rik	RIKEN cDNA 4833439L19 gene [Source:MGI Symbol;Acc:MGI:1921162]	13	-	54564509	54564621	54564184	54564272	54565181	54565325	0.000912784	0.0426827	-0.172	0	0	-0.551
Nnat	neuronatin [Source:MGI Symbol;Acc:MGI:104716]	2	+	157561212	157561239	157560115	157560260	157561541	157562504	9.37492e-08	1.29781e-05	-0.175	0	0	-0.599
Bag6	BCL2-associated athanogene 6 [Source:MGI Symbol;Acc:MGI:1919439]	17	+	35142497	35142605	35142306	35142384	35142726	35142839	5.71987e-05	0.00392809	-0.176	0	0	-0.431
Ubap2l	ubiquitin-associated protein 2-like [Source:MGI Symbol;Acc:MGI:1921633]	3	-	90031310	90031370	90028324	90028377	90034064	90034177	7.67384e-05	0.00509031	-0.178	5.66214e-15	1.61577e-13	-0.301
Traf3	TNF receptor-associated factor 3 [Source:MGI Symbol;Acc:MGI:108041]	12	+	111251129	111251204	111248482	111248646	111252663	111252756	1.28961e-05	0.00103833	-0.181	0.00274045	0.034123	-0.204
Dpf1	D4, zinc and double PHD fingers family 1 [Source:MGI Symbol;Acc:MGI:1352748]	7	+	29311606	29311696	29311264	29311392	29312847	29312926	2.9799e-05	0.00218343	-0.182	0.0369537	0.370149	-0.13
Pitpnm2	phosphatidylinositol transfer protein, membrane-associated 2 [Source:MGI Symbol;Acc:MGI:1336192]	5	-	124124797	124124959	124123938	124124087	124125298	124125463	0.000720417	0.0349472	-0.182	4.52669e-10	1.02393e-08	-0.23
Sorbs1	sorbin and SH3 domain containing 1 [Source:MGI Symbol;Acc:MGI:700014]	19	-	40395678	40395768	40393387	40393516	40398541	40398610	0.000994432	0.0458276	-0.182	0	0	-0.494
Eef2k	eukaryotic elongation factor-2 kinase [Source:MGI Symbol;Acc:MGI:1195261]	7	+	120891595	120891730	120889688	120889751	120891864	120892053	8.26022e-06	0.000688221	-0.184	9.11048e-09	1.90532e-07	-0.235
Slc45a4	solute carrier family 45, member 4 [Source:MGI Symbol;Acc:MGI:2146236]	15	-	73587544	73587724	73586893	73587085	73589385	73589574	4.0081e-05	0.00283023	-0.185	1	1	-0.062
Sdccag3	serologically defined colon cancer antigen 3 [Source:MGI Symbol;Acc:MGI:1915362]	2	-	26385082	26385145	26384681	26384821	26385497	26386063	5.89694e-05	0.00402601	-0.185	0.122737	1	-0.073
Smarce1	SWI/SNF related, matrix associated, actin dependent regulator of chromatin, subfamily e, member 1 [Source:MGI Symbol;Acc:MGI:1927347]	11	-	99225037	99225142	99220654	99220735	99228274	99228318	9.03387e-05	0.00589203	-0.185	0	0	-0.705
Ntan1	N-terminal Asn amidase [Source:MGI Symbol;Acc:MGI:108471]	16	+	13834680	13834794	13832336	13832434	13835134	13835448	0.00046988	0.0243809	-0.185	0	0	-0.253
Arfrp1	ADP-ribosylation factor related protein 1 [Source:MGI Symbol;Acc:MGI:1923938]	2	-	181361000	181361071	181359638	181359739	181361390	181361472	0.000183534	0.0109135	-0.188	1.44329e-15	4.2182e-14	-0.277
Nnat	neuronatin [Source:MGI Symbol;Acc:MGI:104716]	2	+	157561212	157561288	157560106	157560260	157561541	157562238	3.10716e-09	6.36404e-07	-0.189	0	0	-0.586
Mpzl1	myelin protein zero-like 1 [Source:MGI Symbol;Acc:MGI:1915731]	1	-	165601749	165601855	165593367	165593677	165604609	165604742	2.37807e-06	0.000229448	-0.192	0	0	-0.675
Rnf114	ring finger protein 114 [Source:MGI Symbol;Acc:MGI:1933159]	2	+	167507046	167507197	167503436	167503601	167510875	167510982	1.59766e-05	0.00126028	-0.194	0	0	-0.493
Adgrb1	adhesion G protein-coupled receptor B1 [Source:MGI Symbol;Acc:MGI:1933736]	15	+	74577394	74577493	74575838	74575924	74580564	74580736	7.87037e-13	3.8285e-10	-0.199	0	0	-0.37
Dennd5a	DENN/MADD domain containing 5A [Source:MGI Symbol;Acc:MGI:1201681]	7	-	109935481	109935553	109934692	109934802	109960073	109960470	6.52467e-05	0.00441158	-0.199	0	0	-0.896
Sdccag3	serologically defined colon cancer antigen 3 [Source:MGI Symbol;Acc:MGI:1915362]	2	-	26385082	26385145	26384681	26384821	26385540	26385609	0.000234815	0.0134163	-0.202	0.626086	1	-0.072
Rab3ip	RAB3A interacting protein [Source:MGI Symbol;Acc:MGI:105933]	10	-	116928188	116928284	116919573	116919651	116937396	116937655	0.000255983	0.0143909	-0.203	2.96862e-08	6.01688e-07	-0.246
Ntng2	netrin G2 [Source:MGI Symbol;Acc:MGI:2159341]	2	-	29198813	29198915	29196981	29197149	29204897	29204924	1.09666e-05	0.000893241	-0.204	0	0	-0.359
Vldlr	very low density lipoprotein receptor [Source:MGI Symbol;Acc:MGI:98935]	19	+	27246592	27246676	27245534	27245681	27247009	27247090	0.000125073	0.00778076	-0.205	0	0	-0.784
Scarb1	scavenger receptor class B, member 1 [Source:MGI Symbol;Acc:MGI:893578]	5	-	125281104	125281233	125277786	125277865	125283898	125284159	3.37641e-07	4.03602e-05	-0.206	0	0	-0.643
Gria2	glutamate receptor, ionotropic, AMPA2 (alpha 2) [Source:MGI Symbol;Acc:MGI:95809]	3	-	80691319	80691434	80690403	80690518	80692284	80692532	3.06543e-05	0.00223674	-0.208	0.000448689	0.00630083	-0.168
4833439L19Rik	RIKEN cDNA 4833439L19 gene [Source:MGI Symbol;Acc:MGI:1921162]	13	-	54564514	54564621	54556526	54556651	54565181	54565435	0.000211748	0.0123399	-0.208	2.53249e-09	5.44711e-08	-0.38
Tnrc18	trinucleotide repeat containing 18 [Source:MGI Symbol;Acc:MGI:3648294]	5	-	142764768	142764897	142762989	142763161	142765050	142765187	1.36941e-07	1.79633e-05	-0.21	0	0	-0.417
AC149090.1	NA	JH584304.1	-	56985	57151	55111	55701	58563	59690	0.000279919	0.0155617	-0.21	1	1	-0.042
Erc1	ELKS/RAB6-interacting/CAST family member 1 [Source:MGI Symbol;Acc:MGI:2151013]	6	-	119825680	119825819	119824385	119825209	119847876	119848150	0.00106956	0.0487762	-0.211	1.62351e-08	3.3353e-07	-0.388
Ntm	neurotrimin [Source:MGI Symbol;Acc:MGI:2446259]	9	-	29000704	29000737	28996230	28996634	29009225	29009377	3.94026e-06	0.000356599	-0.213	0	0	-0.585
Wbp2	WW domain binding protein 2 [Source:MGI Symbol;Acc:MGI:104709]	11	-	116080545	116080680	116080221	116080344	116081231	116081324	2.08722e-13	1.16036e-10	-0.216	0	0	-0.241
Atxn2	ataxin 2 [Source:MGI Symbol;Acc:MGI:1277223]	5	+	121781332	121781542	121779417	121779596	121783856	121784039	3.57555e-08	5.51674e-06	-0.217	0	0	-0.479
Ktn1	kinectin 1 [Source:MGI Symbol;Acc:MGI:109153]	14	+	47725928	47726000	47724877	47724970	47726225	47726309	0.00010555	0.00674593	-0.217	0.000196088	0.00289127	-0.279
Phactr1	phosphatase and actin regulator 1 [Source:MGI Symbol;Acc:MGI:2659021]	13	+	43059570	43059777	43057178	43057346	43077654	43077976	0.000989088	0.0456839	-0.217	0	0	-0.657
Nnat	neuronatin [Source:MGI Symbol;Acc:MGI:104716]	2	+	157561212	157561293	157560109	157560260	157561541	157562522	2.56452e-09	5.34641e-07	-0.219	0	0	-0.559
Myo18a	myosin XVIIIA [Source:MGI Symbol;Acc:MGI:2667185]	11	+	77854677	77854722	77853751	77853891	77857722	77857845	8.29114e-10	2.07421e-07	-0.22	0	0	-0.666
Peli3	pellino 3 [Source:MGI Symbol;Acc:MGI:1924963]	19	-	4936117	4936219	4935015	4935097	4938048	4938178	5.33071e-05	0.0036825	-0.221	1	1	0.042
Pomgnt2	protein O-linked mannose beta 1,4-N-acetylglucosaminyltransferase 2 [Source:MGI Symbol;Acc:MGI:2143424]	9	-	121984099	121984156	121981605	121983823	121995875	121996013	3.09384e-06	0.000290506	-0.222	0.889625	1	-0.061
Dmd	dystrophin, muscular dystrophy [Source:MGI Symbol;Acc:MGI:94909]	X	+	85144910	85144949	85144028	85144165	85149129	85149195	0.000451063	0.023509	-0.223	0	0	-0.789
4833439L19Rik	RIKEN cDNA 4833439L19 gene [Source:MGI Symbol;Acc:MGI:1921162]	13	-	54564509	54564621	54561707	54561871	54565181	54565325	2.71481e-08	4.30243e-06	-0.225	9.72356e-12	2.41253e-10	-0.325
Cltc	clathrin, heavy polypeptide (Hc) [Source:MGI Symbol;Acc:MGI:2388633]	11	-	86701060	86701081	86697264	86697340	86702208	86702430	2.022e-05	0.00154964	-0.225	0	0	-0.29
Nrxn2	neurexin II [Source:MGI Symbol;Acc:MGI:1096362]	19	+	6513715	6513805	6509777	6509949	6516922	6517248	3.81899e-09	7.64001e-07	-0.227	2.55351e-14	7.09909e-13	-0.241
Abi1	abl-interactor 1 [Source:MGI Symbol;Acc:MGI:104913]	2	-	22950183	22950270	22946575	22946761	22953434	22953611	8.67471e-07	9.31973e-05	-0.227	0	0	-0.566
Jag2	jagged 2 [Source:MGI Symbol;Acc:MGI:1098270]	12	-	112915604	112915718	112915470	112915517	112915879	112915993	5.86655e-05	0.00401309	-0.228	0.0925742	0.830886	-0.01
Chtop	chromatin target of PRMT1 [Source:MGI Symbol;Acc:MGI:1913761]	3	-	90502115	90502253	90498955	90500107	90503095	90503282	0.000207397	0.0121469	-0.23	0	0	-0.487
4833439L19Rik	RIKEN cDNA 4833439L19 gene [Source:MGI Symbol;Acc:MGI:1921162]	13	-	54564514	54564621	54561692	54561871	54565181	54565435	1.05427e-08	1.86489e-06	-0.233	2.91678e-10	6.67767e-09	-0.316
Cadps	Ca2+-dependent secretion activator [Source:MGI Symbol;Acc:MGI:1350922]	14	-	12503249	12503408	12491761	12491863	12505783	12505971	5.77705e-12	2.49797e-09	-0.234	2.02427e-12	5.14928e-11	-0.219
Mprip	myosin phosphatase Rho interacting protein [Source:MGI Symbol;Acc:MGI:1349438]	11	+	59741990	59742098	59741119	59741261	59743770	59743827	1.2795e-11	4.92452e-09	-0.234	0	0	-0.459
Clstn1	calsyntenin 1 [Source:MGI Symbol;Acc:MGI:1929895]	4	+	149626086	149626116	149614049	149614172	149627211	149627407	6.2166e-06	0.000538936	-0.238	0	0	-0.289
Camk2a	calcium/calmodulin-dependent protein kinase II alpha [Source:MGI Symbol;Acc:MGI:88256]	18	+	60969010	60969043	60963922	60963963	60969993	60970042	8.40505e-05	0.00553343	-0.241	1.1622e-07	2.25574e-06	-0.334
Emc10	ER membrane protein complex subunit 10 [Source:MGI Symbol;Acc:MGI:1916933]	7	-	44491162	44491249	44490110	44490970	44491954	44492048	4.37114e-06	0.000391547	-0.242	0	0	-0.493
Bnip2	BCL2/adenovirus E1B interacting protein 2 [Source:MGI Symbol;Acc:MGI:109327]	9	+	70004305	70004341	70003568	70003667	70007063	70008317	0.000435118	0.0228479	-0.244	0	0	-0.953
Igsf3	immunoglobulin superfamily, member 3 [Source:MGI Symbol;Acc:MGI:1926158]	3	+	101432914	101432974	101431203	101431593	101435330	101435732	1.77518e-05	0.00138472	-0.246	2.10609e-13	5.54892e-12	-0.511
Ino80e	INO80 complex subunit E [Source:MGI Symbol;Acc:MGI:2141881]	7	-	126857225	126857342	126851584	126852991	126857675	126857730	0.000241344	0.0137222	-0.246	0	0	-0.479
Smad2	SMAD family member 2 [Source:MGI Symbol;Acc:MGI:108051]	18	+	76286859	76286949	76262439	76262727	76287927	76288121	2.02919e-06	0.000200198	-0.247	5.55112e-16	1.65276e-14	-0.318
Slc38a10	solute carrier family 38, member 10 [Source:MGI Symbol;Acc:MGI:1919305]	11	-	120147720	120147838	120141599	120141645	120150979	120151346	0.000229272	0.013164	-0.249	0	0	-0.327
Mpv17	MpV17 mitochondrial inner membrane protein [Source:MGI Symbol;Acc:MGI:97138]	5	-	31145239	31145278	31144699	31144752	31145494	31145590	0.000964137	0.0447257	-0.25	0	0	-0.554
Tex9	testis expressed gene 9 [Source:MGI Symbol;Acc:MGI:1201610]	9	-	72482446	72482529	72480596	72480775	72484068	72484114	0.000167679	0.0100907	-0.251	1.62456e-06	2.93274e-05	-0.364
Luc7l	Luc7-like [Source:MGI Symbol;Acc:MGI:1914228]	17	+	26253973	26254044	26252998	26253091	26255030	26255125	2.06643e-07	2.58481e-05	-0.252	0.0649625	0.610112	-0.172
Pitpnc1	phosphatidylinositol transfer protein, cytoplasmic 1 [Source:MGI Symbol;Acc:MGI:1919045]	11	-	107216677	107216796	107207891	107212658	107226230	107226294	8.24395e-07	8.91161e-05	-0.252	0	0	-0.552
Eml4	echinoderm microtubule associated protein like 4 [Source:MGI Symbol;Acc:MGI:1926048]	17	+	83428215	83428248	83427999	83428025	83440030	83440154	0.00024016	0.013677	-0.253	0	0	-0.467
Kcnd3	potassium voltage-gated channel, Shal-related family, member 3 [Source:MGI Symbol;Acc:MGI:1928743]	3	+	105666961	105667018	105665456	105665546	105668079	105668327	0.000842497	0.0397677	-0.253	0	0	-0.732
Myo5a	myosin VA [Source:MGI Symbol;Acc:MGI:105976]	9	+	75192383	75192464	75189899	75190000	75193938	75194137	3.7659e-11	1.30591e-08	-0.254	0	0	-0.795
Slit2	slit homolog 2 (Drosophila) [Source:MGI Symbol;Acc:MGI:1315205]	5	+	48220966	48220990	48219916	48220080	48224652	48224803	0.000751581	0.0362581	-0.255	1.18603e-09	2.61429e-08	-0.624
Ift88	intraflagellar transport 88 [Source:MGI Symbol;Acc:MGI:98715]	14	+	57516980	57517091	57507204	57507271	57517336	57517936	0.000520068	0.0266689	-0.256	0.000232646	0.00339805	-0.245
Zfp711	zinc finger protein 711 [Source:MGI Symbol;Acc:MGI:3045342]	X	+	112627169	112627304	112624738	112624876	112628103	112628148	0.000990009	0.0456839	-0.256	1	1	-0.077
Cyfip1	cytoplasmic FMR1 interacting protein 1 [Source:MGI Symbol;Acc:MGI:1338801]	7	+	55898237	55898391	55897818	55897972	55899914	55900071	9.01676e-07	9.62814e-05	-0.258	0	0	-0.671
Pbrm1	polybromo 1 [Source:MGI Symbol;Acc:MGI:1923998]	14	+	31110414	31110579	31107108	31107310	31117012	31117083	6.89819e-05	0.00461955	-0.26	3.33067e-16	1.00452e-14	-0.485
Ythdc1	YTH domain containing 1 [Source:MGI Symbol;Acc:MGI:2443713]	5	+	86820632	86820686	86820085	86820175	86821251	86821346	3.17973e-06	0.000296189	-0.262	0	0	-0.468
Evl	Ena-vasodilator stimulated phosphoprotein [Source:MGI Symbol;Acc:MGI:1194884]	12	+	108683347	108683410	108683194	108683261	108686049	108686116	6.13144e-05	0.00416178	-0.262	0	0	-0.367
Sik3	SIK family kinase 3 [Source:MGI Symbol;Acc:MGI:2446296]	9	+	46204205	46204349	46201999	46202070	46207921	46208072	0.000269282	0.015042	-0.263	0	0	-0.467
Slc8a1	solute carrier family 8 (sodium/calcium exchanger), member 1 [Source:MGI Symbol;Acc:MGI:107956]	17	-	81441651	81441666	81432643	81432774	81441772	81441790	4.59478e-07	5.25907e-05	-0.268	4.32987e-15	1.24499e-13	-0.488
Ncdn	neurochondrin [Source:MGI Symbol;Acc:MGI:1347351]	4	-	126752970	126753040	126751940	126752081	126753324	126753427	0.000123118	0.00767277	-0.269	0	0	-0.634
Dock7	dedicator of cytokinesis 7 [Source:MGI Symbol;Acc:MGI:1914549]	4	-	98992368	98992458	98991363	98991459	98993646	98993736	0.000242554	0.0137686	-0.27	0	0	-0.617
Ap1ar	adaptor-related protein complex 1 associated regulatory protein [Source:MGI Symbol;Acc:MGI:2384822]	3	-	127815595	127815694	127813239	127813295	127816909	127817006	4.42085e-09	8.60199e-07	-0.271	0	0	-0.765
Git2	G protein-coupled receptor kinase-interactor 2 [Source:MGI Symbol;Acc:MGI:1347053]	5	-	114737347	114737437	114733860	114733943	114739032	114739281	0.000580107	0.0291921	-0.271	0	0	-0.886
Synrg	synergin, gamma [Source:MGI Symbol;Acc:MGI:1354742]	11	+	83985248	83985551	83982295	83982307	83987912	83987990	3.8392e-09	7.64001e-07	-0.272	0	0	-0.821
Dlg1	discs, large homolog 1 (Drosophila) [Source:MGI Symbol;Acc:MGI:107231]	16	+	31846836	31846933	31842769	31842839	31847635	31847669	7.9509e-06	0.000666202	-0.276	0	0	-0.602
Cspp1	centrosome and spindle pole associated protein 1 [Source:MGI Symbol;Acc:MGI:2681832]	1	+	10104211	10104364	10095865	10096013	10108368	10108481	0.000565485	0.0285794	-0.276	0	0	-0.773
Grip1	glutamate receptor interacting protein 1 [Source:MGI Symbol;Acc:MGI:1921303]	10	+	119897714	119897795	119453829	119454422	119929900	119930036	0.000955446	0.0443813	-0.276	3.20166e-06	5.63179e-05	-0.345
Nr2c2ap	nuclear receptor 2C2-associated protein [Source:MGI Symbol;Acc:MGI:1922942]	8	+	70132411	70132517	70131917	70132008	70132586	70132654	2.87508e-07	3.47231e-05	-0.278	1.36557e-13	3.652e-12	-0.342
Dock3	dedicator of cyto-kinesis 3 [Source:MGI Symbol;Acc:MGI:2429763]	9	-	106897334	106897457	106896775	106896818	106900706	106900794	0.000169929	0.0102086	-0.285	0	0	-0.781
Fgfr1op2	FGFR1 oncogene partner 2 [Source:MGI Symbol;Acc:MGI:1914779]	6	+	146592633	146592747	146589893	146590036	146595175	146595289	0.000230856	0.0132332	-0.285	0	0	-0.782
Meg3	maternally expressed 3 [Source:MGI Symbol;Acc:MGI:1202886]	12	+	109549290	109549371	109546429	109546542	109549478	109549552	0.000435974	0.0228586	-0.285	0	0	-0.777
Kifc3	kinesin family member C3 [Source:MGI Symbol;Acc:MGI:109202]	8	-	95126525	95126707	95110693	95110759	95134716	95134859	0.000439967	0.0229649	-0.286	3.58833e-10	8.17793e-09	-0.317
Erc1	ELKS/RAB6-interacting/CAST family member 1 [Source:MGI Symbol;Acc:MGI:2151013]	6	-	119777987	119778071	119773733	119773901	119779476	119779632	4.42263e-07	5.14612e-05	-0.287	0	0	-0.441
Alcam	activated leukocyte cell adhesion molecule [Source:MGI Symbol;Acc:MGI:1313266]	16	-	52268789	52268828	52268160	52268499	52270646	52270779	1.58016e-05	0.00124929	-0.287	1.13243e-14	3.19831e-13	-0.411
Kidins220	kinase D-interacting substrate 220 [Source:MGI Symbol;Acc:MGI:1924730]	12	+	25040455	25040569	25038323	25038550	25051094	25051226	3.00759e-13	1.57221e-10	-0.293	0	0	-0.91
Kifc3	kinesin family member C3 [Source:MGI Symbol;Acc:MGI:109202]	8	-	95100646	95100673	95100213	95100452	95101408	95101517	2.30036e-05	0.00174768	-0.293	0	0	-0.455
Prpf40a	pre-mRNA processing factor 40A [Source:MGI Symbol;Acc:MGI:1860512]	2	-	53159262	53159316	53157892	53157917	53159557	53159678	5.02288e-10	1.35324e-07	-0.295	0	0	-0.474
Pex11a	peroxisomal biogenesis factor 11 alpha [Source:MGI Symbol;Acc:MGI:1338788]	7	-	79740164	79740280	79735956	79737910	79742909	79743080	0.000185306	0.0109816	-0.295	0	0	-0.647
Nup214	nucleoporin 214 [Source:MGI Symbol;Acc:MGI:1095411]	2	+	31990234	31990361	31989072	31989139	31991263	31991425	0.00109339	0.049605	-0.298	0.0590645	0.562006	-0.132
Dlgap4	discs, large homolog-associated protein 4 (Drosophila) [Source:MGI Symbol;Acc:MGI:2138865]	2	+	156748331	156748420	156745834	156746196	156748943	156749356	3.61977e-12	1.58474e-09	-0.299	0	0	-0.534
Tnk2	tyrosine kinase, non-receptor, 2 [Source:MGI Symbol;Acc:MGI:1858308]	16	+	32680899	32680995	32679458	32680807	32681151	32681279	1.66995e-05	0.00131435	-0.299	0	0	-0.522
Clip1	CAP-GLY domain containing linker protein 1 [Source:MGI Symbol;Acc:MGI:1928401]	5	-	123638955	123638988	123635173	123635278	123640493	123640554	0.000493905	0.0254765	-0.299	0	0	-0.885
2310035C23Rik	RIKEN cDNA 2310035C23 gene [Source:MGI Symbol;Acc:MGI:1922832]	1	+	105686948	105687020	105678162	105678252	105687129	105687141	0.000139282	0.00848384	-0.3	0	0	-0.752
Shisa7	shisa family member 7 [Source:MGI Symbol;Acc:MGI:3605641]	7	-	4831672	4831723	4830758	4830908	4834229	4834384	0.00026067	0.0146309	-0.302	1	1	-0.341
Mllt1	myeloid/lymphoid or mixed-lineage leukemia; translocated to, 1 [Source:MGI Symbol;Acc:MGI:1927238]	17	-	56902562	56902688	56899768	56900296	56905711	56905855	7.20402e-06	0.000609453	-0.305	0	0	-0.736
Slmap	sarcolemma associated protein [Source:MGI Symbol;Acc:MGI:1933549]	14	-	26416202	26416292	26414729	26414988	26418112	26418247	4.49775e-05	0.00312558	-0.306	0	0	-0.47
Tmem200a	transmembrane protein 200A [Source:MGI Symbol;Acc:MGI:1924470]	10	-	26037627	26037696	25994292	25994385	26078137	26078207	0.000378737	0.0203762	-0.306	1.59997e-06	2.89008e-05	-0.649
Arfgef2	ADP-ribosylation factor guanine nucleotide-exchange factor 2 (brefeldin A-inhibited) [Source:MGI Symbol;Acc:MGI:2139354]	2	+	166842684	166842753	166836201	166836457	166845449	166845601	0.000126696	0.00786774	-0.307	0	0	-0.638
Lrrc49	leucine rich repeat containing 49 [Source:MGI Symbol;Acc:MGI:2442689]	9	-	60680504	60680702	60680068	60680171	60685034	60685122	2.55012e-06	0.000244699	-0.308	0	0	-0.746
Sh2b1	SH2B adaptor protein 1 [Source:MGI Symbol;Acc:MGI:1201407]	7	-	126467949	126468049	126466995	126467773	126468472	126468641	6.54413e-05	0.00441621	-0.308	0	0	-0.793
Abca3	ATP-binding cassette, sub-family A (ABC1), member 3 [Source:MGI Symbol;Acc:MGI:1351617]	17	+	24357918	24357991	24352096	24352251	24360887	24361089	7.7565e-07	8.46305e-05	-0.309	4.93694e-08	9.85431e-07	-0.31
Camk2g	calcium/calmodulin-dependent protein kinase II gamma [Source:MGI Symbol;Acc:MGI:88259]	14	-	20745791	20745860	20744603	20744648	20747818	20747851	0.000106647	0.00679127	-0.309	0	0	-0.678
Nmt2	N-myristoyltransferase 2 [Source:MGI Symbol;Acc:MGI:1202298]	2	+	3305396	3305439	3304811	3304947	3309466	3309611	1.61393e-07	2.07818e-05	-0.313	0	0	-0.671
Tom1l2	target of myb1-like 2 (chicken) [Source:MGI Symbol;Acc:MGI:2443306]	11	-	60232897	60232957	60231100	60231137	60241817	60241893	1.02164e-10	3.2529e-08	-0.315	0	0	-0.593
St3gal3	ST3 beta-galactoside alpha-2,3-sialyltransferase 3 [Source:MGI Symbol;Acc:MGI:1316659]	4	-	118054649	118054697	118031839	118031882	118107548	118107693	3.18269e-05	0.00229836	-0.316	0	0	-0.572
Tecr	trans-2,3-enoyl-CoA reductase [Source:MGI Symbol;Acc:MGI:1915408]	8	-	83573410	83573455	83573219	83573323	83573870	83573922	1.31767e-07	1.74151e-05	-0.317	0	0	-0.687
Gphn	gephyrin [Source:MGI Symbol;Acc:MGI:109602]	12	+	78493949	78494057	78492037	78492310	78504616	78504751	2.08879e-06	0.000204924	-0.318	0	0	-0.854
Map2	microtubule-associated protein 2 [Source:MGI Symbol;Acc:MGI:97175]	1	+	66431526	66431619	66425196	66425528	66433513	66433595	0.000528796	0.0270373	-0.323	0	0	-0.899
Wdfy3	WD repeat and FYVE domain containing 3 [Source:MGI Symbol;Acc:MGI:1096875]	5	-	101878005	101878059	101875840	101876009	101882422	101882650	9.0157e-08	1.26306e-05	-0.325	0	0	-0.858
Slc45a4	solute carrier family 45, member 4 [Source:MGI Symbol;Acc:MGI:2146236]	15	-	73587520	73587724	73586018	73587085	73589385	73589574	1.28487e-07	1.71761e-05	-0.325	1	1	-0.083
Dtnb	dystrobrevin, beta [Source:MGI Symbol;Acc:MGI:1203728]	12	+	3773550	3773640	3772586	3772746	3779618	3779654	0.000120592	0.00755568	-0.325	0	0	-0.658
Pitpnb	phosphatidylinositol transfer protein, beta [Source:MGI Symbol;Acc:MGI:1927542]	5	+	111385519	111385604	111382987	111383110	111386502	111388359	1.18322e-07	1.59388e-05	-0.328	0	0	-0.311
Ptprf	protein tyrosine phosphatase, receptor type, F [Source:MGI Symbol;Acc:MGI:102695]	4	-	118225798	118226377	118225028	118225126	118226453	118226571	5.31298e-10	1.42047e-07	-0.329	0	0	-0.871
Ddhd1	DDHD domain containing 1 [Source:MGI Symbol;Acc:MGI:2150302]	14	-	45599101	45599185	45594721	45595664	45601564	45601756	9.5241e-05	0.00614313	-0.333	0	0	-0.609
Ptprs	protein tyrosine phosphatase, receptor type, S [Source:MGI Symbol;Acc:MGI:97815]	17	-	56429098	56429157	56424879	56424977	56434452	56434597	1.07907e-08	1.88966e-06	-0.334	0	0	-0.79
Stim1	stromal interaction molecule 1 [Source:MGI Symbol;Acc:MGI:107476]	7	+	102428773	102428866	102427081	102427317	102430884	102430928	0.000654599	0.0322457	-0.335	0	0	-0.386
Clasp2	CLIP associating protein 2 [Source:MGI Symbol;Acc:MGI:1923749]	9	+	113887044	113887047	113881687	113881751	113889957	113890121	0.000604285	0.0301919	-0.336	0	0	-0.808
Med15	mediator complex subunit 15 [Source:MGI Symbol;Acc:MGI:2137379]	16	-	17663376	17663496	17655677	17655805	17671544	17671673	6.97249e-05	0.00466039	-0.338	4.67515e-13	1.21482e-11	-0.419
Agfg1	ArfGAP with FG repeats 1 [Source:MGI Symbol;Acc:MGI:1333754]	1	+	82880007	82880127	82876170	82876324	82882227	82882437	1.55431e-14	9.79055e-12	-0.339	0	0	-0.801
Nrxn1	neurexin I [Source:MGI Symbol;Acc:MGI:1096391]	17	-	90163791	90163881	90162113	90162433	90208322	90208494	2.1528e-08	3.50696e-06	-0.339	0	0	-0.598
Sec16a	SEC16 homolog A, endoplasmic reticulum export factor [Source:MGI Symbol;Acc:MGI:2139207]	2	-	26413678	26413738	26412835	26412913	26414370	26414445	1.95943e-06	0.000193862	-0.34	0	0	-0.543
Rbms1	RNA binding motif, single stranded interacting protein 1 [Source:MGI Symbol;Acc:MGI:1861774]	2	-	60759758	60759806	60758803	60758854	60762052	60762146	3.55065e-05	0.00253904	-0.34	0	0	-0.599
Limch1	LIM and calponin homology domains 1 [Source:MGI Symbol;Acc:MGI:1924819]	5	+	66993142	66993178	66974409	66974662	66997119	66997246	9.83811e-05	0.00632238	-0.341	0	0	-0.871
Ddhd1	DDHD domain containing 1 [Source:MGI Symbol;Acc:MGI:2150302]	14	-	45622840	45622942	45620711	45620840	45628853	45628874	3.98532e-05	0.00281984	-0.346	1.22125e-15	3.58659e-14	-0.623
Spata13	spermatogenesis associated 13 [Source:MGI Symbol;Acc:MGI:104838]	14	+	60706713	60707079	60690853	60692548	60709424	60709569	0.000175255	0.0105105	-0.346	0	0	-0.974
Capzb	capping protein (actin filament) muscle Z-line, beta [Source:MGI Symbol;Acc:MGI:104652]	4	+	139288860	139288973	139287755	139287832	139291002	139291814	1.15935e-11	4.56237e-09	-0.348	0	0	-0.667
Ctsa	cathepsin A [Source:MGI Symbol;Acc:MGI:97748]	2	+	164833807	164833850	164832925	164833196	164834029	164834208	2.55628e-10	7.33861e-08	-0.349	0	0	-0.447
Sorbs1	sorbin and SH3 domain containing 1 [Source:MGI Symbol;Acc:MGI:700014]	19	-	40344355	40344439	40340044	40340146	40349898	40350013	9.34491e-06	0.000773749	-0.351	0	0	-0.606
Lrch2	leucine-rich repeats and calponin homology (CH) domain containing 2 [Source:MGI Symbol;Acc:MGI:2147870]	X	-	147484753	147484804	147481614	147481672	147488233	147488278	1.68898e-05	0.00132634	-0.354	0	0	-0.93
Spag9	sperm associated antigen 9 [Source:MGI Symbol;Acc:MGI:1918084]	11	+	94113262	94113301	94112032	94112146	94114172	94114349	3.97331e-09	7.86222e-07	-0.358	0	0	-0.932
Ppp1r9a	protein phosphatase 1, regulatory (inhibitor) subunit 9A [Source:MGI Symbol;Acc:MGI:2442401]	6	+	5083040	5083106	5077479	5077615	5100431	5100587	4.05297e-06	0.000364913	-0.359	0	0	-0.862
Epn1	epsin 1 [Source:MGI Symbol;Acc:MGI:1333763]	7	+	5093311	5093386	5092840	5092965	5093898	5093982	6.9622e-06	0.000591855	-0.36	0	0	-0.925
Dock4	dedicator of cytokinesis 4 [Source:MGI Symbol;Acc:MGI:1918006]	12	+	40838440	40838554	40836629	40836702	40841236	40841298	6.05901e-05	0.00412109	-0.36	0	0	-0.802
Neo1	neogenin [Source:MGI Symbol;Acc:MGI:1097159]	9	-	58884469	58884628	58880591	58880855	58888400	58888493	4.44371e-10	1.20649e-07	-0.361	0	0	-0.664
Ctsa	cathepsin A [Source:MGI Symbol;Acc:MGI:97748]	2	+	164833772	164833850	164832908	164833196	164834029	164834062	6.91559e-10	1.76797e-07	-0.362	0	0	-0.455
Slc12a2	solute carrier family 12, member 2 [Source:MGI Symbol;Acc:MGI:101924]	18	+	57934950	57934998	57932479	57932605	57936307	57936430	2.39915e-07	2.95872e-05	-0.362	0	0	-0.679
Mark3	MAP/microtubule affinity regulating kinase 3 [Source:MGI Symbol;Acc:MGI:1341865]	12	+	111651957	111651984	111647470	111647728	111653389	111653434	7.20166e-06	0.000609453	-0.363	0	0	-0.971
Map4	microtubule-associated protein 4 [Source:MGI Symbol;Acc:MGI:97178]	9	+	110081420	110081610	110079780	110079893	110081840	110083947	4.10783e-15	2.87745e-12	-0.368	0	0	-0.738
Plpp1	phospholipid phosphatase 1 [Source:MGI Symbol;Acc:MGI:108412]	13	+	112851402	112851554	112800862	112801266	112856745	112857026	4.7461e-09	9.08346e-07	-0.368	0	0	-0.625
Abi2	abl-interactor 2 [Source:MGI Symbol;Acc:MGI:106913]	1	+	60447259	60447406	60443984	60444082	60448077	60448202	1.04252e-07	1.4263e-05	-0.368	0	0	-0.585
Ildr2	immunoglobulin-like domain containing receptor 2 [Source:MGI Symbol;Acc:MGI:1196370]	1	+	166295751	166295928	166294590	166294737	166303501	166303615	1.48362e-11	5.64809e-09	-0.372	2.75335e-14	7.64764e-13	-0.707
Apc	adenomatosis polyposis coli [Source:MGI Symbol;Acc:MGI:88039]	18	+	34261004	34261157	34247697	34247734	34268297	34268379	6.08488e-06	0.000528826	-0.372	6.05478e-05	0.00094366	-0.398
Pbrm1	polybromo 1 [Source:MGI Symbol;Acc:MGI:1923998]	14	+	31113848	31114004	31107108	31107310	31117012	31117083	2.75777e-06	0.000263183	-0.373	0	0	-0.758
Dst	dystonin [Source:MGI Symbol;Acc:MGI:104627]	1	+	34249803	34250130	34249478	34249638	34250609	34250694	0	0	-0.374	0	0	-0.955
Itga3	integrin alpha 3 [Source:MGI Symbol;Acc:MGI:96602]	11	-	95046448	95046590	95044473	95045763	95046920	95047046	2.26215e-09	4.83107e-07	-0.376	0	0	-0.713
Ctsa	cathepsin A [Source:MGI Symbol;Acc:MGI:97748]	2	+	164833723	164833850	164832872	164833196	164834029	164834208	1.49141e-09	3.3919e-07	-0.377	0	0	-0.467
Clip1	CAP-GLY domain containing linker protein 1 [Source:MGI Symbol;Acc:MGI:1928401]	5	-	123627293	123627410	123623212	123623270	123630452	123631169	1.51379e-07	1.96367e-05	-0.378	0	0	-0.948
Sema6a	sema domain, transmembrane domain (TM), and cytoplasmic domain, (semaphorin) 6A [Source:MGI Symbol;Acc:MGI:1203727]	18	-	47270608	47270773	47245253	47249584	47276585	47276606	2.67325e-11	9.80354e-09	-0.38	0	0	-0.767
Eml4	echinoderm microtubule associated protein like 4 [Source:MGI Symbol;Acc:MGI:1926048]	17	+	83425257	83425431	83421605	83421735	83427222	83427351	4.6761e-07	5.3174e-05	-0.382	0	0	-0.893
Synrg	synergin, gamma [Source:MGI Symbol;Acc:MGI:1354742]	11	+	83986813	83987047	83982195	83982307	83987912	83987990	6.27634e-07	7.00072e-05	-0.383	0	0	-0.927
Ddhd1	DDHD domain containing 1 [Source:MGI Symbol;Acc:MGI:2150302]	14	-	45622840	45622893	45620711	45620840	45628853	45628874	1.45543e-05	0.00116116	-0.386	2.48912e-13	6.53529e-12	-0.664
Baz2b	bromodomain adjacent to zinc finger domain, 2B [Source:MGI Symbol;Acc:MGI:2442782]	2	-	59935214	59935280	59933670	59933715	59936685	59936751	9.17153e-05	0.00595963	-0.39	1.01641e-08	2.11687e-07	-0.498
Gpm6b	glycoprotein m6b [Source:MGI Symbol;Acc:MGI:107672]	X	+	166385390	166385481	166383934	166384000	166386951	166388988	2.90393e-07	3.49509e-05	-0.397	0	0	-0.891
Map4	microtubule-associated protein 4 [Source:MGI Symbol;Acc:MGI:97178]	9	+	110064227	110064449	110063016	110063123	110067484	110067668	3.72683e-11	1.30528e-08	-0.403	0	0	-0.832
Slc8a1	solute carrier family 8 (sodium/calcium exchanger), member 1 [Source:MGI Symbol;Acc:MGI:107956]	17	-	81442202	81442223	81441772	81441790	81445486	81445593	4.49212e-07	5.17007e-05	-0.404	0	0	-0.544
Myl6	myosin, light polypeptide 6, alkali, smooth muscle and non-muscle [Source:MGI Symbol;Acc:MGI:109318]	10	-	128491719	128491764	128490860	128491033	128492058	128492136	0	0	-0.406	0	0	-0.707
Tpm3	tropomyosin 3, gamma [Source:MGI Symbol;Acc:MGI:1890149]	3	+	90091012	90091091	90090009	90090079	90098374	90098783	5.00579e-07	5.65557e-05	-0.407	0	0	-0.588
Sh2b1	SH2B adaptor protein 1 [Source:MGI Symbol;Acc:MGI:1201407]	7	-	126467949	126468049	126466995	126467773	126468419	126468641	0.000219854	0.0127486	-0.408	0	0	-0.834
Cadm1	cell adhesion molecule 1 [Source:MGI Symbol;Acc:MGI:1889272]	9	+	47818733	47818817	47813772	47813945	47848166	47848298	1.11022e-16	9.48401e-14	-0.409	0	0	-0.718
Nfasc	neurofascin [Source:MGI Symbol;Acc:MGI:104753]	1	-	132627871	132627922	132621511	132621623	132631684	132631855	8.27264e-06	0.000688221	-0.409	4.53964e-07	8.53522e-06	-0.142
Apc	adenomatosis polyposis coli [Source:MGI Symbol;Acc:MGI:88039]	18	+	34261004	34261157	34221012	34221276	34268297	34268379	1.37083e-05	0.00109616	-0.412	4.23923e-05	0.000671785	-0.327
Macf1	microtubule-actin crosslinking factor 1 [Source:MGI Symbol;Acc:MGI:108559]	4	-	123397093	123397420	123395912	123395997	123397747	123397907	2.68713e-11	9.80354e-09	-0.413	0	0	-0.98
Morf4l2	mortality factor 4 like 2 [Source:MGI Symbol;Acc:MGI:1927167]	X	-	136735545	136735622	136732941	136734501	136739804	136739894	0	0	-0.414	0	0	-0.755
Map4	microtubule-associated protein 4 [Source:MGI Symbol;Acc:MGI:97178]	9	+	110071025	110071139	110068692	110068985	110072612	110072705	1.11022e-16	9.48401e-14	-0.419	0	0	-0.775
Pdzd4	PDZ domain containing 4 [Source:MGI Symbol;Acc:MGI:2443483]	X	-	73798757	73798848	73798193	73798292	73824281	73824969	0.00105238	0.0481813	-0.421	0	0	-0.766
Cadm1	cell adhesion molecule 1 [Source:MGI Symbol;Acc:MGI:1889272]	9	+	47818733	47818817	47813772	47813945	47829376	47829409	0	0	-0.423	0	0	-0.883
Sema6a	sema domain, transmembrane domain (TM), and cytoplasmic domain, (semaphorin) 6A [Source:MGI Symbol;Acc:MGI:1203727]	18	-	47276418	47276469	47247439	47249584	47276585	47276606	5.73616e-05	0.00393157	-0.425	0	0	-0.886
Cadps2	Ca2+-dependent activator protein for secretion 2 [Source:MGI Symbol;Acc:MGI:2443963]	6	-	23320932	23320947	23314132	23314207	23321705	23321853	2.17892e-06	0.000211984	-0.428	1.04499e-09	2.30676e-08	-0.841
Dtnb	dystrobrevin, beta [Source:MGI Symbol;Acc:MGI:1203728]	12	+	3732617	3732707	3718411	3718489	3734938	3735026	7.89043e-08	1.12798e-05	-0.433	0	0	-0.87
Dlgap4	discs, large homolog-associated protein 4 (Drosophila) [Source:MGI Symbol;Acc:MGI:2138865]	2	+	156748331	156748403	156745834	156746196	156748943	156749356	1.15583e-06	0.000120841	-0.443	0	0	-0.659
Pdzd4	PDZ domain containing 4 [Source:MGI Symbol;Acc:MGI:2443483]	X	-	73799833	73800087	73798193	73798292	73824281	73824969	7.45969e-05	0.00496707	-0.443	0	0	-0.765
Dtnb	dystrobrevin, beta [Source:MGI Symbol;Acc:MGI:1203728]	12	+	3773550	3773640	3772586	3772746	3774569	3774610	4.52439e-11	1.53847e-08	-0.446	1	1	-0.668
Mycbp2	MYC binding protein 2 [Source:MGI Symbol;Acc:MGI:2179432]	14	-	103269357	103269465	103262701	103262821	103275788	103275890	1.23065e-10	3.74804e-08	-0.449	0	0	-0.863
Lrrc7	leucine rich repeat containing 7 [Source:MGI Symbol;Acc:MGI:2676665]	3	-	158156787	158156928	158148579	158148699	158160232	158161913	0.00077743	0.0372996	-0.449	1	1	-0.824
Ptprf	protein tyrosine phosphatase, receptor type, F [Source:MGI Symbol;Acc:MGI:102695]	4	-	118231485	118231791	118230694	118230888	118234958	118235103	7.77156e-16	6.04869e-13	-0.45	0	0	-0.959
Atp6v1h	ATPase, H+ transporting, lysosomal V1 subunit H [Source:MGI Symbol;Acc:MGI:1914864]	1	+	5101069	5101123	5098028	5098133	5117389	5117487	3.55835e-11	1.27171e-08	-0.452	0	0	-0.741
Afdn	afadin, adherens junction formation factor [Source:MGI Symbol;Acc:MGI:1314653]	17	+	13848354	13848375	13846433	13846639	13849107	13849253	0.000833754	0.0394614	-0.456	0	0	-0.946
Ank2	ankyrin 2, brain [Source:MGI Symbol;Acc:MGI:88025]	3	-	126928664	126928847	126921613	126923971	126929721	126929812	5.47339e-10	1.44254e-07	-0.464	0	0	-0.889
Stx4a	syntaxin 4A (placental) [Source:MGI Symbol;Acc:MGI:893577]	7	+	127848568	127848667	127848387	127848498	127848750	127849019	2.18852e-09	4.73152e-07	-0.464	0	0	-0.929
Crim1	cysteine rich transmembrane BMP regulator 1 (chordin like) [Source:MGI Symbol;Acc:MGI:1354756]	17	+	78279972	78280215	78237741	78237915	78281245	78281366	0	0	-0.465	0	0	-0.697
Dmxl2	Dmx-like 2 [Source:MGI Symbol;Acc:MGI:2444630]	9	-	54379774	54379837	54378916	54379003	54380907	54381025	2.34134e-08	3.76366e-06	-0.467	0	0	-0.96
Rasa2	RAS p21 protein activator 2 [Source:MGI Symbol;Acc:MGI:2149960]	9	-	96566015	96568487	96560697	96560781	96569019	96569094	1.34208e-05	0.00107563	-0.472	1.1154e-05	0.000187263	-0.571
Slc8a1	solute carrier family 8 (sodium/calcium exchanger), member 1 [Source:MGI Symbol;Acc:MGI:107956]	17	-	81441651	81441666	81437744	81437813	81441772	81441790	7.98104e-09	1.45588e-06	-0.497	4.44089e-16	1.32744e-14	-0.722
Dst	dystonin [Source:MGI Symbol;Acc:MGI:104627]	1	+	34303420	34303531	34302829	34303032	34306527	34306651	0	0	-0.522	0	0	-0.964
Sbf1	SET binding factor 1 [Source:MGI Symbol;Acc:MGI:1925230]	15	-	89295951	89296029	89295394	89295576	89299482	89299620	0	0	-0.547	0	0	-0.893
Erc1	ELKS/RAB6-interacting/CAST family member 1 [Source:MGI Symbol;Acc:MGI:2151013]	6	-	119713679	119713811	119694570	119694731	119722172	119722308	4.45821e-09	8.62676e-07	-0.557	0	0	-0.911
Arhgap39	Rho GTPase activating protein 39 [Source:MGI Symbol;Acc:MGI:107858]	15	-	76730363	76730456	76727402	76727476	76734876	76735438	1.51109e-06	0.00015385	-0.56	0	0	-0.937
L3mbtl3	l(3)mbt-like 3 (Drosophila) [Source:MGI Symbol;Acc:MGI:2143628]	10	-	26344176	26344251	26342507	26342667	26344611	26344723	3.58e-09	7.24774e-07	-0.579	0	0	-0.968
